# Supplementary material
Source: publisher site journal article supplement (https://www.spandidos-publications.com/5537/downloadSupplementary)
Supplement: Supplementary file 1 [file downloadSupplementary]

## Sheet: Summary
Group_1	Group_1 Samples	Group_2	Group_2 Samples	Up	Down
LPS	LPS_1,LPS_2,LPS_3	control	Control_1,Control_2,Control_3	594	938

## Sheet: LPS_vs_control
Table SIII. All long non-coding RNAs detected by RNA sequencing
ID	LPS_1	LPS_2	LPS_3	Control_1	Control_2	Control_3	baseMeanA	baseMeanB	baseMean	log2FoldChange	lfcSE	stat	pvalue	padj	type
NONMMUG070370.1	1.90688	9.08268	3.00217	1.76534	0.940519	0	4.66391	0.901954	2.78293	2.35513	2.2844	1.03096	0.302559	NA	Not DEG
NONMMUG026659.2	55.2995	35.1954	56.0405	28.2455	29.1561	29.032	48.8451	28.8112	38.8282	0.763114	0.646085	1.18114	0.237549	0.999731	Not DEG
NONMMUG066160.1	3.81376	1.13534	0	0	15.0483	0	1.6497	5.0161	3.3329	-1.5982	2.69265	-0.593541	0.552819	NA	Not DEG
NONMMUG026098.2	0	0	0	0	1.88104	0.967735	0	0.949591	0.474795	-2.32687	3.99295	-0.582745	0.560065	NA	Not DEG
NONMMUG055362.1	0	0	4.00289	0	0	0	1.3343	0	0.667149	2.96686	3.97454	0.746468	0.455385	NA	Not DEG
NONMMUG077280.1	0	0	2.00145	0	1.88104	0	0.667149	0.627013	0.647081	0.0968916	3.99651	0.0242441	0.980658	NA	Not DEG
NONMMUG012557.2	5.72063	23.842	23.0166	13.2401	21.6319	11.6128	17.5264	15.4949	16.5107	0.174711	0.995501	0.1755	0.860687	0.999731	Not DEG
NONMMUG031430.2	99.1577	111.263	264.191	305.404	220.081	183.87	158.204	236.452	197.328	-0.579643	0.481474	-1.20389	0.228631	0.999731	Not DEG
NONMMUG092899.1	2.86032	6.81201	5.00361	6.1787	5.64312	5.80641	4.89198	5.87607	5.38403	-0.268945	1.49712	-0.179642	0.857434	0.999731	Not DEG
NONMMUG017074.3	89.6233	64.7141	162.117	74.1444	147.662	115.16	105.485	112.322	108.903	-0.0891577	0.527613	-0.168983	0.86581	0.999731	Not DEG
NONMMUG033106.2	1034.48	731.156	947.684	762.628	894.434	886.445	904.441	847.836	876.138	0.0935565	0.306499	0.305243	0.760181	0.999731	Not DEG
NONMMUG061237.1	0	0	0	0	0	0.967735	0	0.322578	0.161289	-0.818059	4.08047	-0.200481	0.841104	NA	Not DEG
NONMMUG082933.1	0.953439	0	0	0	0	0	0.317813	0	0.158907	1.10549	4.08047	0.270923	0.78645	NA	Not DEG
NONMMUG038212.2	0.953439	0	7.00506	7.06137	5.64312	3.87094	2.65283	5.52514	4.08899	-1.05279	1.94949	-0.540033	0.589174	NA	Not DEG
NONMMUG033637.3	0	0	6.00434	2.64801	18.8104	2.9032	2.00145	8.12053	5.06099	-2.01382	2.0557	-0.979627	0.32727	NA	Not DEG
NONMMUG015385.2	18.1153	26.1127	28.0202	18.5361	37.6208	57.0963	24.0828	37.7511	30.9169	-0.648242	0.762114	-0.850584	0.395	0.999731	Not DEG
NONMMUG063039.1	0	0	0	3.53069	2.82156	1.93547	0	2.76257	1.38129	-3.87072	3.49327	-1.10805	0.267839	NA	Not DEG
NONMMUG018452.2	0	3.40601	8.00578	1.76534	0	7.74188	3.80393	3.16907	3.4865	0.264864	2.32206	0.114064	0.909187	NA	Not DEG
NONMMUG067206.1	0	0	0	0	1.88104	0.967735	0	0.949591	0.474795	-2.32687	3.99295	-0.582745	0.560065	NA	Not DEG
NONMMUG061999.1	0	0	0	9.70939	18.8104	0	0	9.50659	4.75329	-5.65351	2.53961	-2.22613	0.0260054	NA	Down
NONMMUG019917.2	0	0	0	0	0	3.87094	0	1.29031	0.645156	-2.76799	3.97043	-0.697153	0.485707	NA	Not DEG
NONMMUG006896.2	95.3439	69.2555	40.0289	47.6643	51.7286	37.7416	68.2094	45.7115	56.9605	0.577592	0.594873	0.970951	0.331573	0.999731	Not DEG
NONMMUG031059.2	7.62751	13.624	11.008	18.5361	15.9888	16.4515	10.7532	16.9921	13.8727	-0.663401	0.991709	-0.668948	0.503529	0.999731	Not DEG
NONMMUG038883.3	29.5566	64.7141	148.107	146.523	141.078	205.16	80.7926	164.254	122.523	-1.02355	0.578957	-1.76793	0.0770731	0.999731	Not DEG
NONMMUG074828.1	0	2.27067	0	0	0.940519	0	0.75689	0.313506	0.535198	1.16641	4.02714	0.289636	0.772094	NA	Not DEG
NONMMUG056528.1	0	0	2.00145	0	0	0	0.667149	0	0.333574	1.9693	4.04091	0.487342	0.626016	NA	Not DEG
NONMMUG066858.1	0	0	3.00217	0	0	0	1.00072	0	0.500361	2.55269	3.99681	0.638681	0.52303	NA	Not DEG
NONMMUG077797.1	30.5101	22.7067	37.0267	38.8375	39.5018	78.3865	30.0812	52.2419	41.1616	-0.7939	0.669064	-1.18658	0.235392	0.999731	Not DEG
NONMMUG068105.1	28.6032	12.4887	4.00289	2.64801	30.0966	23.2256	15.0316	18.6568	16.8442	-0.307941	1.14441	-0.269082	0.787866	0.999731	Not DEG
NONMMUG030399.2	0	0	1.00072	0	0	0	0.333574	0	0.166787	1.10549	4.08047	0.270923	0.78645	NA	Not DEG
NONMMUG033285.2	29.5566	22.7067	24.0173	41.4856	66.7769	90.967	25.4269	66.4098	45.9184	-1.38286	0.638099	-2.16716	0.0302229	0.841236	Down
NONMMUG067491.1	0	23.842	0	12.3574	6.58363	5.80641	7.94735	8.24915	8.09825	-0.0628295	1.80794	-0.034752	0.972278	0.999731	Not DEG
NONMMUG077527.1	0	0	0	0	0	2.9032	0	0.967735	0.483867	-2.35177	3.99149	-0.589196	0.55573	NA	Not DEG
NONMMUG022669.2	50.5323	97.6388	22.0159	16.7708	36.6802	86.1284	56.729	46.5265	51.6277	0.285463	0.771946	0.369797	0.711534	0.999731	Not DEG
NONMMUG009554.2	0	0	0	0	0	29.032	0	9.67735	4.83867	-5.6777	2.90584	-1.95389	0.0507137	NA	Not DEG
NONMMUG088099.1	0	0	0	0	2.82156	0	0	0.940519	0.47026	-2.31429	3.9937	-0.579485	0.562262	NA	Not DEG
NONMMUG082850.1	1.90688	0	0	0	4.7026	0.967735	0.635626	1.89011	1.26287	-1.55497	3.74001	-0.415766	0.677582	NA	Not DEG
NONMMUG069886.1	0.953439	0	2.00145	9.70939	0	4.83867	0.984962	4.84935	2.91716	-2.28816	2.49028	-0.918837	0.358181	NA	Not DEG
NONMMUG064245.1	0	0	0	0	1.88104	3.87094	0	1.91733	0.958663	-3.34122	3.94967	-0.84595	0.397581	NA	Not DEG
NONMMUG042309.2	27.6497	12.4887	19.0137	13.2401	12.2267	11.6128	19.7174	12.3599	16.0386	0.676099	0.942661	0.717225	0.473236	0.999731	Not DEG
NONMMUG023779.2	40.9979	19.3007	27.0195	39.7202	40.4423	8.70961	29.106	29.624	29.365	-0.0245964	0.833633	-0.029505	0.976462	0.999731	Not DEG
NONMMUG045056.2	0	0	0	0	0	3.87094	0	1.29031	0.645156	-2.76799	3.97043	-0.697153	0.485707	NA	Not DEG
NONMMUG034411.2	15.255	34.0601	8.00578	37.9549	33.8587	8.70961	19.107	26.8411	22.974	-0.495995	0.942071	-0.526494	0.598545	0.999731	Not DEG
NONMMUG067038.1	0	3.40601	0	1.76534	0	0	1.13534	0.588448	0.861891	0.925704	3.94951	0.234384	0.814687	NA	Not DEG
NONMMUG073090.1	35.2772	12.4887	19.0137	14.1227	18.8104	0	22.2599	10.9777	16.6188	1.01989	1.21451	0.839757	0.401045	0.999731	Not DEG
NONMMUG012067.2	58.1598	18.1654	4.00289	20.3014	40.4423	45.4835	26.776	35.4091	31.0926	-0.399633	0.927929	-0.430672	0.666707	0.999731	Not DEG
NONMMUG023940.2	0	0	0	1.76534	0	0	0	0.588448	0.294224	-1.64922	4.04373	-0.407847	0.683386	NA	Not DEG
NONMMUG087579.1	184.014	127.158	174.126	187.126	141.078	132.58	161.766	153.595	157.68	0.0752103	0.413538	0.18187	0.855684	0.999731	Not DEG
NONMMUG083357.1	0	0	0	0	2.82156	0	0	0.940519	0.47026	-2.31429	3.9937	-0.579485	0.562262	NA	Not DEG
NONMMUG093397.1	2.86032	0	2.00145	8.82671	11.2862	2.9032	1.62059	7.67205	4.64632	-2.2255	1.83908	-1.21012	0.226234	NA	Not DEG
NONMMUG012548.2	147.783	196.413	153.111	169.473	170.234	131.612	165.769	157.106	161.438	0.0764468	0.400981	0.190649	0.8488	0.999731	Not DEG
NONMMUG007750.2	21.9291	4.54134	15.0108	252.444	33.8587	9.67735	13.8271	98.66	56.2436	-2.83008	0.968081	-2.92339	0.00346239	0.351982	Down
NONMMUG006469.2	8.58095	48.8194	11.008	2.64801	8.46467	15.4838	22.8028	8.86548	15.8341	1.36209	1.13106	1.20426	0.228489	0.999731	Not DEG
NONMMUG070908.1	0	0	0	0	0	1.93547	0	0.645156	0.322578	-1.76457	4.03337	-0.437493	0.661754	NA	Not DEG
NONMMUG049595.1	0	0	0	0	2.82156	0	0	0.940519	0.47026	-2.31429	3.9937	-0.579485	0.562262	NA	Not DEG
NONMMUG023271.2	10.4878	19.3007	0	0	12.2267	0	9.92951	4.07558	7.00255	1.28391	2.10341	0.610395	0.5416	0.999731	Not DEG
NONMMUG025415.2	48.6254	86.2855	201.145	110.334	117.565	139.354	112.019	122.418	117.218	-0.127828	0.558971	-0.228684	0.819114	0.999731	Not DEG
NONMMUG093659.1	21.9291	9.08268	12.0087	7.94404	11.2862	6.77414	14.3402	8.66814	11.5041	0.72911	1.09987	0.662907	0.50739	0.999731	Not DEG
NONMMUG076254.1	21.9291	6.81201	5.00361	8.82671	20.6914	4.83867	11.2482	11.4523	11.3503	-0.0220519	1.20424	-0.0183119	0.98539	0.999731	Not DEG
NONMMUG063743.1	12.3947	15.8947	17.0123	16.7708	13.1673	25.1611	15.1006	18.3664	16.7335	-0.282609	0.920756	-0.306931	0.758896	0.999731	Not DEG
NONMMUG012693.2	41.9513	20.436	21.0152	28.2455	24.4535	34.8384	27.8008	29.1791	28.49	-0.0670308	0.75542	-0.0887331	0.929294	0.999731	Not DEG
NONMMUG013524.2	0	2.27067	2.00145	6.1787	2.82156	0	1.42404	3.00009	2.21206	-1.08574	2.69885	-0.402299	0.687464	NA	Not DEG
NONMMUG010333.2	7.62751	13.624	10.0072	36.1895	20.6914	2.9032	10.4196	19.9281	15.1738	-0.940163	1.11397	-0.843979	0.398681	0.999731	Not DEG
NONMMUG044949.2	0	0	0	0	0	6.77414	0	2.25805	1.12902	-3.57695	3.94323	-0.907111	0.364348	NA	Not DEG
NONMMUG053398.1	0	2.27067	0	6.1787	8.46467	0	0.75689	4.88112	2.81901	-2.72349	2.7695	-0.983386	0.325418	NA	Not DEG
NONMMUG026301.2	94.3905	127.158	68.0492	81.2058	66.7769	90.967	96.5324	79.6499	88.0911	0.276218	0.498991	0.553553	0.579885	0.999731	Not DEG
NONMMUG026653.2	42.9048	39.7367	22.0159	16.7708	5.64312	7.74188	34.8858	10.0519	22.4689	1.79131	0.879343	2.03711	0.0416393	0.918937	Up
NONMMUG049562.1	20.9757	9.08268	14.0101	0	4.7026	9.67735	14.6895	4.79331	9.7414	1.62323	1.40495	1.15537	0.24794	0.999731	Not DEG
NONMMUG088223.1	0	0	4.00289	0	0	0	1.3343	0	0.667149	2.96686	3.97454	0.746468	0.455385	NA	Not DEG
NONMMUG064031.1	0	0	0	0	11.2862	0	0	3.76208	1.88104	-4.3153	3.92866	-1.09841	0.272023	NA	Not DEG
NONMMUG007196.2	0	20.436	6.00434	0	0	0	8.81346	0	4.40673	5.68456	2.61762	2.17165	0.0298822	NA	Up
NONMMUG006260.2	62.927	28.3834	37.0267	42.3682	22.5725	15.4838	42.779	26.8081	34.7936	0.674159	0.744021	0.906102	0.364882	0.999731	Not DEG
NONMMUG004968.2	16.2085	0	0	0	0	0	5.40282	0	2.70141	4.98423	3.47037	1.43622	0.150939	NA	Not DEG
NONMMUG007877.2	0	0	0	0	0	5.80641	0	1.93547	0.967735	-3.35419	3.94929	-0.849316	0.395705	NA	Not DEG
NONMMUG094842.1	2.86032	3.40601	1.00072	0	0	0.967735	2.42235	0.322578	1.37246	2.86122	3.25684	0.878526	0.379658	NA	Not DEG
NONMMUG091241.1	0	2.27067	4.00289	2.64801	0	0	2.09119	0.882671	1.48693	1.23411	3.4728	0.355366	0.722315	NA	Not DEG
NONMMUG020373.2	45.7651	35.1954	40.0289	33.5415	65.8363	46.4513	40.3298	48.6097	44.4697	-0.26783	0.62725	-0.426991	0.669386	0.999731	Not DEG
NONMMUG048967.1	0	0	0	0	0	23.2256	0	7.74188	3.87094	-5.35569	3.10209	-1.72648	0.0842609	NA	Not DEG
NONMMUG065011.1	0	4.54134	2.00145	6.1787	0	5.80641	2.18093	3.99504	3.08798	-0.88395	2.39	-0.369853	0.711492	NA	Not DEG
NONMMUG083926.1	0	0	0	0	0	7.74188	0	2.58063	1.29031	-3.76987	3.93869	-0.957138	0.338498	NA	Not DEG
NONMMUG008248.2	0	0	0	3.53069	0	0	0	1.1769	0.588448	-2.64457	3.97606	-0.665123	0.505972	NA	Not DEG
NONMMUG080460.1	0	0	0	2.64801	0	0	0	0.882671	0.441336	-2.23116	3.99879	-0.557959	0.576872	NA	Not DEG
NONMMUG044848.2	20.0222	49.9548	43.0311	129.753	86.5278	77.4188	37.6694	97.8997	67.7845	-1.38173	0.584278	-2.36486	0.0180371	0.673774	Down
NONMMUG060722.1	9.53439	3.40601	2.00145	0	2.82156	0	4.98061	0.940519	2.96057	2.41039	2.42998	0.991939	0.321227	NA	Not DEG
NONMMUG081626.2	0	0	0	0	0	11.6128	0	3.87094	1.93547	-4.35547	3.91835	-1.11156	0.266329	NA	Not DEG
NONMMUG029947.2	0	0	0	0	5.64312	0	0	1.88104	0.940519	-3.31496	3.95045	-0.839134	0.401394	NA	Not DEG
NONMMUG065300.1	0	0	0	0	0	3.87094	0	1.29031	0.645156	-2.76799	3.97043	-0.697153	0.485707	NA	Not DEG
NONMMUG069603.1	3.81376	0	10.0072	2.64801	0	0	4.60699	0.882671	2.74483	2.37348	2.77608	0.854973	0.392566	NA	Not DEG
NONMMUG006286.2	0	15.8947	6.00434	12.3574	6.58363	12.5805	7.29968	10.5072	8.90344	-0.534185	1.47317	-0.362611	0.716896	0.999731	Not DEG
NONMMUG009601.2	79.1354	102.18	151.109	107.686	156.126	116.128	110.808	126.647	118.728	-0.192675	0.468129	-0.411585	0.680644	0.999731	Not DEG
NONMMUG054153.1	0	2.27067	0	10.5921	0	0	0.75689	3.53069	2.14379	-2.24669	3.43914	-0.653272	0.513581	NA	Not DEG
NONMMUG056782.2	4.7672	0	0	15.0054	0	0	1.58907	5.0018	3.29543	-1.64602	2.95989	-0.556108	0.578137	NA	Not DEG
NONMMUG003297.2	23.836	30.6541	16.0116	34.4242	71.4795	41.6126	23.5005	49.1721	36.3363	-1.06698	0.704914	-1.51363	0.13012	0.999731	Not DEG
NONMMUG012160.2	3.81376	1.13534	11.008	3.53069	0.940519	0	5.31901	1.4904	3.40471	1.82848	2.14786	0.851303	0.394601	NA	Not DEG
NONMMUG046109.2	20.0222	13.624	8.00578	9.70939	7.52415	106.451	13.884	41.2281	27.5561	-1.56788	1.05024	-1.49288	0.135468	0.999731	Not DEG
NONMMUG070403.1	193.548	160.082	150.108	191.54	155.186	248.708	167.913	198.478	183.195	-0.240742	0.400292	-0.601416	0.547563	0.999731	Not DEG
NONMMUG077449.1	0	0	1.00072	0	0	0.967735	0.333574	0.322578	0.328076	0.143722	4.08047	0.0352219	0.971903	NA	Not DEG
NONMMUG092046.1	5.72063	35.1954	0	0	15.0483	10.6451	13.6387	8.56446	11.1016	0.668862	1.68886	0.396043	0.692074	0.999731	Not DEG
NONMMUG083366.1	0	0	0	3.53069	0	0	0	1.1769	0.588448	-2.64457	3.97606	-0.665123	0.505972	NA	Not DEG
NONMMUG053041.1	0	17.03	3.00217	2.64801	5.64312	7.74188	6.6774	5.34434	6.01087	0.314486	1.74481	0.180241	0.856964	0.999731	Not DEG
NONMMUG018828.2	267.916	29.5187	178.129	155.35	11.2862	389.029	158.521	185.222	171.872	-0.224153	1.32898	-0.168666	0.86606	0.999731	Not DEG
NONMMUG020517.2	0	0	4.00289	15.8881	0	19.3547	1.3343	11.7476	6.54094	-3.1297	2.09926	-1.49086	0.135999	0.999731	Not DEG
NONMMUG026381.2	0	0	0	5.29603	9.40519	10.6451	0	8.44877	4.22438	-5.48237	2.29392	-2.38996	0.0168502	NA	Down
NONMMUG051505.1	0	0	0	0.882671	0	2.9032	0	1.26196	0.630979	-2.73798	3.97176	-0.689363	0.490595	NA	Not DEG
NONMMUG004585.2	0	4.54134	5.00361	3.53069	3.76208	3.87094	3.18165	3.72123	3.45144	-0.231168	2.0206	-0.114406	0.908916	NA	Not DEG
NONMMUG093192.1	10.4878	12.4887	4.00289	9.70939	15.0483	2.9032	8.99314	9.2203	9.10672	-0.0389468	1.2769	-0.0305011	0.975667	0.999731	Not DEG
NONMMUG035964.2	0	23.842	0	0	0	0	7.94735	0	3.97367	5.53511	3.07179	1.80192	0.0715584	NA	Not DEG
NONMMUG089697.1	0	0	0	77.6751	0	0	0	25.8917	12.9458	-7.09878	3.90995	-1.81557	NA	NA	Not DEG
NONMMUG054049.1	0	0	0	0	0	11.6128	0	3.87094	1.93547	-4.35547	3.91835	-1.11156	0.266329	NA	Not DEG
NONMMUG075853.1	0	4.54134	0	0	0	0	1.51378	0	0.75689	3.13659	3.96707	0.790655	0.429145	NA	Not DEG
NONMMUG003132.2	0	0	0	0	0	5.80641	0	1.93547	0.967735	-3.35419	3.94929	-0.849316	0.395705	NA	Not DEG
NONMMUG039139.2	5.72063	265.668	27.0195	11.4747	19.7509	275.804	99.4695	102.343	100.906	-0.0414759	1.72025	-0.0241104	0.980765	0.999731	Not DEG
NONMMUG078314.1	0	0	3.00217	0	0	0	1.00072	0	0.500361	2.55269	3.99681	0.638681	0.52303	NA	Not DEG
NONMMUG057757.1	0	0	0	0	0	8.70961	0	2.9032	1.4516	-3.94001	3.93515	-1.00123	0.316713	NA	Not DEG
NONMMUG043115.2	0	0	8.00578	0	11.2862	0	2.66859	3.76208	3.21534	-0.49243	2.98859	-0.16477	0.869125	NA	Not DEG
NONMMUG027958.3	3.81376	5.67668	9.00651	13.2401	42.3234	15.4838	6.16565	23.6824	14.924	-1.94175	1.06184	-1.82866	0.0674503	0.999731	Not DEG
NONMMUG002859.2	26.6963	22.7067	14.0101	48.5469	16.9293	37.7416	21.1377	34.406	27.7718	-0.703374	0.795381	-0.884324	0.376521	0.999731	Not DEG
NONMMUG041038.2	0	0	2.00145	0	0	0	0.667149	0	0.333574	1.9693	4.04091	0.487342	0.626016	NA	Not DEG
NONMMUG015065.2	85.8095	155.541	225.163	168.59	169.293	136.451	155.504	158.111	156.808	-0.0245546	0.465503	-0.0527485	0.957932	0.999731	Not DEG
NONMMUG044483.2	2.86032	12.4887	3.00217	6.1787	22.5725	1.93547	6.11706	10.2289	8.17297	-0.75016	1.44438	-0.519366	0.603505	0.999731	Not DEG
NONMMUG042106.2	0	0	0	0	4.7026	0	0	1.56753	0.783766	-3.05179	3.95914	-0.770821	0.440813	NA	Not DEG
NONMMUG019569.2	0	0	4.00289	0	0	0	1.3343	0	0.667149	2.96686	3.97454	0.746468	0.455385	NA	Not DEG
NONMMUG068402.1	7.62751	1.13534	4.00289	7.94404	7.52415	9.67735	4.25525	8.38185	6.31855	-0.968332	1.46574	-0.660643	0.508841	0.999731	Not DEG
NONMMUG015651.2	75.3217	52.2254	114.082	116.513	100.636	63.8705	80.5432	93.6729	87.108	-0.21717	0.533238	-0.407267	0.683812	0.999731	Not DEG
NONMMUG019118.2	65.7873	73.7968	101.073	163.294	127.911	83.2252	80.219	124.81	102.515	-0.638247	0.491703	-1.29803	0.194276	0.999731	Not DEG
NONMMUG043643.2	0	9.08268	23.0166	25.5975	34.7992	13.5483	10.6998	24.6483	17.674	-1.20533	1.20548	-0.999873	0.317372	0.999731	Not DEG
NONMMUG031625.2	48.6254	66.9848	174.126	86.5018	131.673	137.418	96.5786	118.531	107.555	-0.294763	0.568374	-0.518608	0.604034	0.999731	Not DEG
NONMMUG005597.2	0	0	0	0	0	11.6128	0	3.87094	1.93547	-4.35547	3.91835	-1.11156	0.266329	NA	Not DEG
NONMMUG011466.2	0	0	17.0123	0	3.76208	0.967735	5.67076	1.5766	3.62368	1.85108	2.62348	0.705582	0.480448	NA	Not DEG
NONMMUG038765.2	87.7164	84.0148	34.0246	40.6029	22.5725	88.0638	68.5853	50.4131	59.4992	0.444639	0.6824	0.651582	0.514671	0.999731	Not DEG
NONMMUG053134.1	12.3947	35.1954	16.0116	9.70939	19.7509	12.5805	21.2006	14.0136	17.6071	0.59421	0.948433	0.626518	0.530975	0.999731	Not DEG
NONMMUG011441.2	13.3481	0	0	13.2401	9.40519	0	4.44938	7.54842	5.9989	-0.756861	2.18654	-0.346145	0.729233	0.999731	Not DEG
NONMMUG005419.2	96.2974	71.5261	79.0571	184.478	82.7657	93.8702	82.2935	120.371	101.332	-0.548648	0.509153	-1.07757	0.281226	0.999731	Not DEG
NONMMUG089653.1	3.81376	9.08268	0	0	0.940519	0	4.29881	0.313506	2.30616	3.68698	2.99961	1.22915	0.219015	NA	Not DEG
NONMMUG088814.1	0	0	3.00217	0	0	2.9032	1.00072	0.967735	0.984229	0.0572032	3.90592	0.0146452	0.988315	NA	Not DEG
NONMMUG023479.2	656.92	641.464	529.382	1313.42	1357.17	530.319	609.255	1066.97	838.112	-0.80853	0.393036	-2.05714	0.0396729	0.917494	Down
NONMMUG039686.2	11.4413	0	3.00217	0	0	4.83867	4.81448	1.61289	3.21369	1.58826	2.64439	0.600614	0.548097	NA	Not DEG
NONMMUG088909.1	0	0	0	0	0	2.9032	0	0.967735	0.483867	-2.35177	3.99149	-0.589196	0.55573	NA	Not DEG
NONMMUG021417.2	47.672	145.323	79.0571	121.809	79.0036	63.8705	90.684	88.2276	89.4558	0.0365813	0.569344	0.0642516	0.94877	0.999731	Not DEG
NONMMUG011872.2	39.091	17.03	80.0578	48.5469	25.394	27.0966	45.393	33.6792	39.5361	0.431539	0.756971	0.570087	0.568619	0.999731	Not DEG
NONMMUG028299.2	4.7672	0	0	0	0	0	1.58907	0	0.794533	3.22255	3.96361	0.813035	0.416198	NA	Not DEG
NONMMUG063580.1	4.7672	0	0	0	2.82156	23.2256	1.58907	8.6824	5.13573	-2.43181	2.31625	-1.04989	0.293769	0.999731	Not DEG
NONMMUG011923.2	0	10.218	0	1.76534	0	2.9032	3.40601	1.55618	2.48109	1.12334	2.91946	0.384776	0.700403	NA	Not DEG
NONMMUG071866.1	3.81376	0	0	0	3.76208	0	1.27125	1.25403	1.26264	0.0287447	3.86639	0.00743451	0.994068	NA	Not DEG
NONMMUG043096.2	1.90688	3.40601	3.00217	1.76534	2.82156	2.9032	2.77168	2.4967	2.63419	0.14947	2.02981	0.0736374	0.941299	NA	Not DEG
NONMMUG025823.2	122.994	168.03	9.00651	133.283	7.52415	112.257	100.01	84.3549	92.1824	0.244707	0.904631	0.270505	0.786772	0.999731	Not DEG
NONMMUG020422.2	558.715	249.774	425.307	215.372	476.843	327.094	411.265	339.77	375.518	0.276337	0.43064	0.64169	0.521075	0.999731	Not DEG
NONMMUG084365.1	0	0	0	0	0	19.3547	0	6.45156	3.22578	-5.09259	3.28401	-1.55072	0.120968	NA	Not DEG
NONMMUG021872.2	245.034	267.939	309.223	203.897	279.334	242.901	274.065	242.044	258.055	0.179409	0.358964	0.499798	0.617218	0.999731	Not DEG
NONMMUG010929.2	134.435	82.8795	74.0535	113.865	132.613	111.289	97.1226	119.256	108.189	-0.294987	0.469301	-0.628565	0.529634	0.999731	Not DEG
NONMMUG085955.1	0	0	0	0	9.40519	7.74188	0	5.71569	2.85784	-4.91809	2.99508	-1.64206	0.100578	NA	Not DEG
NONMMUG013787.2	7.62751	0	0	0	0	0	2.5425	0	1.27125	3.89829	3.94245	0.988799	0.322761	NA	Not DEG
NONMMUG020563.2	239.313	283.834	222.16	297.46	254.881	159.676	248.436	237.339	242.887	0.0651335	0.393261	0.165624	0.868453	0.999731	Not DEG
NONMMUG015679.2	0	1.13534	0	0	0	14.516	0.378445	4.83867	2.60856	-3.71534	3.25231	-1.14237	0.253301	NA	Not DEG
NONMMUG082600.1	0	0	0	0	0	3.87094	0	1.29031	0.645156	-2.76799	3.97043	-0.697153	0.485707	NA	Not DEG
NONMMUG079123.1	2.86032	0	0	0	0	0	0.953439	0	0.47672	2.48945	4.0008	0.62224	0.533784	NA	Not DEG
NONMMUG043337.2	0	0	2.00145	0	4.7026	0	0.667149	1.56753	1.11734	-1.22619	3.91834	-0.312937	0.754329	NA	Not DEG
NONMMUG019130.3	0	40.8721	5.00361	0	0	0	15.2919	0	7.64595	6.47957	2.28828	2.83163	0.00463115	0.4074	Up
NONMMUG014139.2	0	0	2.00145	0	0	3.87094	0.667149	1.29031	0.978731	-0.942403	3.92975	-0.239812	0.810476	NA	Not DEG
NONMMUG031715.2	0	7.94735	0	0.882671	0	1.93547	2.64912	0.93938	1.79425	1.49008	3.29828	0.451775	0.651431	NA	Not DEG
NONMMUG008396.2	7.62751	7.94735	9.00651	7.94404	11.2862	10.6451	8.19379	9.95845	9.07612	-0.280683	1.18116	-0.237633	0.812166	0.999731	Not DEG
NONMMUG039044.2	21.9291	2.27067	4.00289	0	3.76208	6.77414	9.40089	3.51207	6.45648	1.42975	1.71965	0.83142	0.405737	0.999731	Not DEG
NONMMUG016403.2	32.4169	35.1954	18.013	53.843	28.2156	50.3222	28.5418	44.1269	36.3343	-0.630025	0.698285	-0.902246	0.366926	0.999731	Not DEG
NONMMUG079100.1	0	4.54134	0	0	0	0	1.51378	0	0.75689	3.13659	3.96707	0.790655	0.429145	NA	Not DEG
NONMMUG013947.2	23.836	4.54134	13.0094	48.5469	20.6914	9.67735	13.7956	26.3052	20.0504	-0.927096	1.00716	-0.920506	0.357308	0.999731	Not DEG
NONMMUG019388.2	0	3.40601	0	0	0	4.83867	1.13534	1.61289	1.37411	-0.515735	3.86144	-0.13356	0.89375	NA	Not DEG
NONMMUG026598.2	108.692	120.346	125.09	169.473	81.8252	122.902	118.043	124.733	121.388	-0.0802404	0.462117	-0.173636	0.862151	0.999731	Not DEG
NONMMUG015430.2	7.62751	9.08268	23.0166	45.0162	30.0966	8.70961	13.2423	27.9408	20.5915	-1.07751	0.972884	-1.10755	0.268058	0.999731	Not DEG
NONMMUG034204.3	22.8825	57.9021	44.0318	26.4801	15.0483	7.74188	41.6055	16.4234	29.0145	1.33623	0.815412	1.63872	0.101272	0.999731	Not DEG
NONMMUG092383.1	0	0	0	0	3.76208	0	0	1.25403	0.627013	-2.72965	3.97213	-0.687202	0.491955	NA	Not DEG
NONMMUG059036.1	0	4.54134	0	0	0	0	1.51378	0	0.75689	3.13659	3.96707	0.790655	0.429145	NA	Not DEG
NONMMUG043135.2	61.9735	104.451	116.084	122.691	127.911	74.5156	94.1694	108.372	101.271	-0.203942	0.49929	-0.408463	0.682934	0.999731	Not DEG
NONMMUG027896.2	0	0	0	0	0	7.74188	0	2.58063	1.29031	-3.76987	3.93869	-0.957138	0.338498	NA	Not DEG
NONMMUG090017.1	6.67407	3.40601	41.0296	0	9.40519	7.74188	17.0366	5.71569	11.3761	1.58069	1.46583	1.07836	0.280875	0.999731	Not DEG
NONMMUG067081.1	0.953439	1.13534	1.00072	12.3574	12.2267	5.80641	1.02983	10.1302	5.58001	-3.3021	1.67985	-1.96571	0.0493318	0.969385	Down
NONMMUG067706.1	17.1619	12.4887	0	1.76534	10.3457	13.5483	9.88353	8.55311	9.21832	0.210647	1.52589	0.138048	0.890202	0.999731	Not DEG
NONMMUG089506.1	0	0	3.00217	0	1.88104	0	1.00072	0.627013	0.813868	0.680273	3.95191	0.172138	0.863329	NA	Not DEG
NONMMUG074332.2	3.81376	13.624	13.0094	4.41336	32.9182	7.74188	10.1491	15.0245	12.5868	-0.568482	1.20105	-0.473323	0.635983	0.999731	Not DEG
NONMMUG079934.1	15.255	5.67668	2.00145	4.41336	3.76208	7.74188	7.64438	5.30577	6.47508	0.531436	1.4735	0.360663	0.718352	0.999731	Not DEG
NONMMUG031570.2	108.692	166.894	130.094	105.038	182.461	178.063	135.227	155.187	145.207	-0.199145	0.443594	-0.448936	0.653478	0.999731	Not DEG
NONMMUG065198.1	0	0	0	0	0	3.87094	0	1.29031	0.645156	-2.76799	3.97043	-0.697153	0.485707	NA	Not DEG
NONMMUG073672.1	0	3.40601	2.00145	2.64801	0	0	1.80248	0.882671	1.34258	1.01712	3.61219	0.281579	0.778266	NA	Not DEG
NONMMUG062277.1	0	3.40601	0	0	0	0	1.13534	0	0.567668	2.71864	3.98713	0.681855	0.495331	NA	Not DEG
NONMMUG031459.2	41.9513	51.0901	63.0455	54.7256	68.6579	56.1286	52.029	59.8374	55.9332	-0.20189	0.559698	-0.360712	0.718315	0.999731	Not DEG
NONMMUG076823.1	148.737	203.225	97.0701	195.953	163.65	137.418	149.677	165.674	157.676	-0.147894	0.443589	-0.333404	0.73883	0.999731	Not DEG
NONMMUG025258.2	0	6.81201	10.0072	10.5921	10.3457	21.2902	5.60641	14.076	9.84119	-1.33187	1.39494	-0.95479	0.339684	0.999731	Not DEG
NONMMUG038557.2	0	9.08268	0	0	0	0	3.02756	0	1.51378	4.14117	3.93694	1.05187	0.292857	NA	Not DEG
NONMMUG091481.1	1.90688	0	5.00361	2.64801	2.82156	1.93547	2.3035	2.46835	2.38592	-0.0937036	2.34252	-0.0400012	0.968092	NA	Not DEG
NONMMUG040768.2	24.7894	9.08268	9.00651	15.8881	50.788	0	14.2929	22.2254	18.2591	-0.634758	1.28133	-0.495391	0.620324	0.999731	Not DEG
NONMMUG048517.1	3.81376	19.3007	41.0296	7.06137	3.76208	29.032	21.3814	13.2852	17.3333	0.688141	1.15371	0.596458	0.550869	0.999731	Not DEG
NONMMUG053804.1	3.81376	2.27067	7.00506	0.882671	2.82156	10.6451	4.36316	4.7831	4.57313	-0.125876	1.73525	-0.0725409	0.942171	NA	Not DEG
NONMMUG011075.2	213.57	195.278	168.121	221.551	277.453	122.902	192.323	207.302	199.813	-0.108405	0.428511	-0.252981	0.800283	0.999731	Not DEG
NONMMUG065235.1	5.72063	1.13534	13.0094	22.0668	0	0	6.62179	7.3556	6.98869	-0.152273	1.96638	-0.0774383	0.938275	0.999731	Not DEG
NONMMUG021562.2	11.4413	0	0	0	0	18.387	3.81376	6.12899	4.97137	-0.676976	2.63727	-0.256695	0.797414	NA	Not DEG
NONMMUG057545.2	107.739	95.3682	101.073	89.1498	126.97	65.8059	101.393	93.9753	97.6843	0.109761	0.48187	0.227782	0.819816	0.999731	Not DEG
NONMMUG051631.1	0	0	0	0	0	5.80641	0	1.93547	0.967735	-3.35419	3.94929	-0.849316	0.395705	NA	Not DEG
NONMMUG002335.2	126.807	29.5187	11.008	30.0108	25.394	17.4192	55.778	24.2747	40.0264	1.20147	0.868347	1.38363	0.166471	0.999731	Not DEG
NONMMUG041932.2	0	0	20.0145	7.06137	10.3457	6.77414	6.67149	8.06041	7.36595	-0.270201	1.82514	-0.148044	0.882308	0.999731	Not DEG
NONMMUG029810.2	39.091	38.6014	50.0361	15.0054	22.5725	21.2902	42.5762	19.6227	31.0994	1.11885	0.708221	1.57981	0.114151	0.999731	Not DEG
NONMMUG016910.2	0	0	0	0	0	3.87094	0	1.29031	0.645156	-2.76799	3.97043	-0.697153	0.485707	NA	Not DEG
NONMMUG004051.2	1519.78	967.306	3111.25	1514.66	3468.63	969.67	1866.11	1984.32	1925.22	-0.0885285	0.494229	-0.179124	0.85784	0.999731	Not DEG
NONMMUG053349.1	0	4.54134	0	0	0	0	1.51378	0	0.75689	3.13659	3.96707	0.790655	0.429145	NA	Not DEG
NONMMUG075545.1	0	0	0	3.53069	0	11.6128	0	5.04783	2.52392	-4.73904	3.14482	-1.50693	0.131828	NA	Not DEG
NONMMUG017778.2	143.969	84.0148	166.12	124.457	63.9553	147.096	131.368	111.836	121.602	0.233332	0.50538	0.461696	0.644299	0.999731	Not DEG
NONMMUG075646.1	10.4878	24.9774	0	0	4.7026	0	11.8217	1.56753	6.69463	2.91551	2.09547	1.39134	0.164122	0.999731	Not DEG
NONMMUG059103.1	5.72063	0	3.00217	3.53069	0	2.9032	2.9076	2.14463	2.52612	0.444162	2.54488	0.174532	0.861448	NA	Not DEG
NONMMUG070761.1	11.4413	23.842	8.00578	17.6534	7.52415	1.93547	14.4297	9.03768	11.7337	0.668053	1.20613	0.55388	0.579661	0.999731	Not DEG
NONMMUG004072.3	17.1619	9.08268	15.0108	27.3628	15.0483	20.3224	13.7518	20.9112	17.3315	-0.602175	0.918154	-0.655854	0.511918	0.999731	Not DEG
NONMMUG047514.1	0	13.624	0	0	2.82156	0.967735	4.54134	1.2631	2.90222	1.84328	2.81313	0.655242	0.512312	NA	Not DEG
NONMMUG047026.1	0	9.08268	0	1.76534	2.82156	0	3.02756	1.52897	2.27826	0.975924	2.9999	0.325319	0.74494	NA	Not DEG
NONMMUG013949.2	1.90688	2.27067	1.00072	2.64801	5.64312	0.967735	1.72609	3.08629	2.40619	-0.841722	2.18429	-0.385352	0.699976	NA	Not DEG
NONMMUG050527.1	0	22.7067	12.0087	18.5361	6.58363	25.1611	11.5718	16.7603	14.166	-0.540163	1.30718	-0.413228	0.67944	0.999731	Not DEG
NONMMUG069043.1	2.86032	3.40601	0	0	0	0.967735	2.08877	0.322578	1.20568	2.64716	3.77877	0.700537	0.483592	NA	Not DEG
NONMMUG027424.2	0	0	0	0	0	3.87094	0	1.29031	0.645156	-2.76799	3.97043	-0.697153	0.485707	NA	Not DEG
NONMMUG039411.2	38.1376	40.8721	51.0369	52.0776	44.2044	21.2902	43.3488	39.1907	41.2698	0.144335	0.663955	0.217387	0.827907	0.999731	Not DEG
NONMMUG016673.2	82.9492	46.5487	27.0195	165.942	175.877	16.4515	52.1725	119.424	85.798	-1.19424	0.750414	-1.59144	0.111511	0.999731	Not DEG
NONMMUG000462.2	4.7672	9.08268	14.0101	5.29603	0	8.70961	9.28667	4.66855	6.97761	0.992464	1.57997	0.628154	0.529903	0.999731	Not DEG
NONMMUG029176.2	0.953439	1.13534	4.00289	6.1787	13.1673	0.967735	2.03056	6.77123	4.40089	-1.73513	1.83244	-0.946896	0.343692	NA	Not DEG
NONMMUG092686.1	0.953439	0	0	0	0	0	0.317813	0	0.158907	1.10549	4.08047	0.270923	0.78645	NA	Not DEG
NONMMUG015807.2	40.9979	53.3608	70.0506	33.5415	104.398	20.3224	54.8031	52.7539	53.7785	0.05489	0.712944	0.0769906	0.938631	0.999731	Not DEG
NONMMUG031471.2	3.81376	0	0	0	0	6.77414	1.27125	2.25805	1.76465	-0.817532	3.65673	-0.223569	0.823093	NA	Not DEG
NONMMUG019356.2	20.0222	39.7367	8.00578	24.7148	17.8699	14.516	22.5882	19.0336	20.8109	0.242289	0.920024	0.263351	0.79228	0.999731	Not DEG
NONMMUG013499.2	2.86032	6.81201	0	0	0	2.9032	3.22411	0.967735	2.09592	1.74055	3.06077	0.568663	0.569585	NA	Not DEG
NONMMUG028952.2	0	0	14.0101	6.1787	1.88104	0	4.67004	2.68658	3.67831	0.79577	2.57099	0.309519	0.756927	NA	Not DEG
NONMMUG040184.3	25.7429	56.7668	88.0636	62.6697	59.2527	95.8057	56.8577	72.576	64.7169	-0.352519	0.617132	-0.571222	0.567849	0.999731	Not DEG
NONMMUG023617.2	29.5566	37.4661	33.0239	30.8935	51.7286	16.4515	33.3488	33.0245	33.1867	0.0129228	0.735819	0.0175624	0.985988	0.999731	Not DEG
NONMMUG072141.1	0	0	1.00072	3.53069	8.46467	0	0.333574	3.99845	2.16601	-3.44226	3.06254	-1.12399	0.261018	NA	Not DEG
NONMMUG067114.1	0	3.40601	3.00217	5.29603	15.0483	3.87094	2.13606	8.07176	5.10391	-1.92945	1.78292	-1.08218	0.27917	0.999731	Not DEG
NONMMUG024413.2	5.72063	3.40601	4.00289	2.64801	1.88104	6.77414	4.37651	3.76773	4.07212	0.220712	1.71709	0.128538	0.897723	NA	Not DEG
NONMMUG095203.1	2.86032	2.27067	4.00289	0	0.940519	7.74188	3.04463	2.89413	2.96938	0.0793477	2.22742	0.0356232	0.971583	NA	Not DEG
NONMMUG095382.1	12.3947	3.40601	7.00506	14.1227	0	27.0966	7.60192	13.7398	10.6708	-0.849136	1.45476	-0.583693	0.559427	0.999731	Not DEG
NONMMUG089339.1	24.7894	0	8.00578	22.0668	4.7026	0	10.9317	8.92313	9.92743	0.294072	1.72546	0.170431	0.864671	0.999731	Not DEG
NONMMUG010502.2	40.9979	26.1127	53.0383	90.9152	49.8475	18.387	40.0496	53.0499	46.5498	-0.405491	0.725806	-0.558677	0.576382	0.999731	Not DEG
NONMMUG020684.2	475.766	370.119	157.113	437.805	268.988	357.094	334.333	354.629	344.481	-0.085095	0.445705	-0.190922	0.848586	0.999731	Not DEG
NONMMUG085408.1	10.4878	0	0	0	0	0	3.49594	0	1.74797	4.35662	3.93277	1.10777	0.267959	NA	Not DEG
NONMMUG018457.2	0	10.218	7.00506	19.4188	29.1561	13.5483	5.74103	20.7077	13.2244	-1.86158	1.25625	-1.48185	0.13838	0.999731	Not DEG
NONMMUG021602.3	361.353	594.916	399.288	494.296	458.033	411.287	451.853	454.539	453.196	-0.00928304	0.346681	-0.0267769	0.978638	0.999731	Not DEG
NONMMUG057733.1	0	4.54134	0	0	0	0	1.51378	0	0.75689	3.13659	3.96707	0.790655	0.429145	NA	Not DEG
NONMMUG082811.1	49.5788	102.18	74.0535	98.8592	76.1821	39.6771	75.2708	71.5728	73.4218	0.0700244	0.578136	0.121121	0.903595	0.999731	Not DEG
NONMMUG076148.1	0	29.5187	25.0181	10.5921	21.6319	20.3224	18.1789	17.5155	17.8472	0.0510942	1.21882	0.0419211	0.966562	0.999731	Not DEG
NONMMUG034346.2	174.479	38.6014	160.116	228.612	173.056	143.225	124.399	181.631	153.015	-0.544334	0.551374	-0.987232	0.323529	0.999731	Not DEG
NONMMUG094569.1	22.8825	7.94735	48.0347	32.6588	38.5613	29.9998	26.2882	33.74	30.0141	-0.356861	0.823482	-0.433356	0.664756	0.999731	Not DEG
NONMMUG057042.1	0	3.40601	3.00217	7.94404	7.52415	3.87094	2.13606	6.44638	4.29122	-1.60512	1.86457	-0.860854	0.389319	NA	Not DEG
NONMMUG047373.1	0	0	0	0	1.88104	0	0	0.627013	0.313506	-1.7287	4.03651	-0.428266	0.668458	NA	Not DEG
NONMMUG094683.1	0	0	0	0	0	2.9032	0	0.967735	0.483867	-2.35177	3.99149	-0.589196	0.55573	NA	Not DEG
NONMMUG004994.2	37.1841	2.27067	12.0087	2.64801	2.82156	9.67735	17.1545	5.04897	11.1017	1.77228	1.32596	1.3366	0.181354	0.999731	Not DEG
NONMMUG090162.1	21.9291	49.9548	32.0231	50.3123	31.0371	14.516	34.6357	31.9551	33.2954	0.11202	0.769811	0.145516	0.884304	0.999731	Not DEG
NONMMUG016104.2	326.076	339.465	206.149	290.399	240.773	288.385	290.563	273.186	281.875	0.0886557	0.371736	0.238491	0.8115	0.999731	Not DEG
NONMMUG031021.2	127.761	122.616	203.147	89.1498	93.1114	128.709	151.175	103.657	127.416	0.545248	0.453562	1.20215	0.229306	0.999731	Not DEG
NONMMUG087877.1	22307.6	30798.2	26574.2	27516.4	29326.3	28690.4	26560	28511.1	27535.5	-0.102274	0.274964	-0.371953	0.709928	0.999731	Not DEG
NONMMUG032478.2	33.3704	27.248	8.00578	4.41336	18.8104	0	22.8747	7.74125	15.308	1.56294	1.28972	1.21185	0.225572	0.999731	Not DEG
NONMMUG002341.2	113.459	73.7968	82.0593	105.038	141.078	83.2252	89.7718	109.78	99.776	-0.289241	0.482505	-0.599458	0.548867	0.999731	Not DEG
NONMMUG036165.2	65.7873	11.3534	31.0224	39.7202	53.6096	37.7416	36.0544	43.6905	39.8724	-0.272933	0.757775	-0.360177	0.718715	0.999731	Not DEG
NONMMUG065093.1	0	5.67668	5.00361	0	0	7.74188	3.5601	2.58063	3.07036	0.464868	2.68824	0.172927	0.862709	NA	Not DEG
NONMMUG051137.1	0	0	0	0	0	23.2256	0	7.74188	3.87094	-5.35569	3.10209	-1.72648	0.0842609	NA	Not DEG
NONMMUG088226.1	0	1.13534	0	2.64801	0	0	0.378445	0.882671	0.630558	-1.26938	3.99879	-0.317441	0.750909	NA	Not DEG
NONMMUG084591.1	0	3.40601	0	0	0	0	1.13534	0	0.567668	2.71864	3.98713	0.681855	0.495331	NA	Not DEG
NONMMUG050119.2	3.81376	0	0	0	0	10.6451	1.27125	3.54836	2.40981	-1.46817	3.28174	-0.447376	0.654604	NA	Not DEG
NONMMUG076193.1	39.091	18.1654	32.0231	33.5415	33.8587	28.0643	29.7598	31.8215	30.7907	-0.0940449	0.723354	-0.130012	0.896557	0.999731	Not DEG
NONMMUG080902.1	1.90688	0	0	0	0	0	0.635626	0	0.317813	1.90889	4.04654	0.471733	0.637118	NA	Not DEG
NONMMUG076756.1	0	0	0	0	0	2.9032	0	0.967735	0.483867	-2.35177	3.99149	-0.589196	0.55573	NA	Not DEG
NONMMUG074665.1	2.86032	0	1.00072	0.882671	0	0	1.28701	0.294224	0.790619	1.95676	3.97682	0.492042	0.62269	NA	Not DEG
NONMMUG033992.2	61.0201	56.7668	95.0687	98.8592	98.7545	51.2899	70.9518	82.9679	76.9599	-0.225665	0.543709	-0.415048	0.678106	0.999731	Not DEG
NONMMUG019752.2	0	0	10.0072	0	0	0	3.33574	0	1.66787	4.28711	3.93405	1.08974	0.275826	NA	Not DEG
NONMMUG021393.2	0	0	4.00289	19.4188	20.6914	8.70961	1.3343	16.2733	8.80378	-3.59579	1.6219	-2.21702	0.0266215	0.78764	Down
NONMMUG041315.2	11.4413	54.4961	42.0304	36.1895	6.58363	56.1286	35.9892	32.9673	34.4782	0.12452	0.894812	0.139158	0.889325	0.999731	Not DEG
NONMMUG072275.1	0	4.54134	0	0	0	0	1.51378	0	0.75689	3.13659	3.96707	0.790655	0.429145	NA	Not DEG
NONMMUG079641.1	7.62751	0	0	0	1.88104	7.74188	2.5425	3.20764	2.87507	-0.324882	2.76637	-0.11744	0.906512	NA	Not DEG
NONMMUG073225.1	0	0	0	2.64801	0	0	0	0.882671	0.441336	-2.23116	3.99879	-0.557959	0.576872	NA	Not DEG
NONMMUG029623.2	0	0	0	3.53069	0	12.5805	0	5.37041	2.68521	-4.82836	3.07991	-1.56769	0.116953	NA	Not DEG
NONMMUG048713.1	0	0	0	0	0	6.77414	0	2.25805	1.12902	-3.57695	3.94323	-0.907111	0.364348	NA	Not DEG
NONMMUG039840.2	3.81376	1.13534	2.00145	6.1787	1.88104	1.93547	2.31685	3.33174	2.82429	-0.520475	2.03372	-0.255923	0.79801	NA	Not DEG
NONMMUG035542.2	5.72063	1.13534	1.00072	1.76534	1.88104	7.74188	2.6189	3.79609	3.20749	-0.524713	1.99924	-0.262457	0.792969	NA	Not DEG
NONMMUG088105.1	0	0	0	0	2.82156	3.87094	0	2.23083	1.11542	-3.56014	3.94366	-0.902751	0.366658	NA	Not DEG
NONMMUG003580.2	0	0	0	0	0	0.967735	0	0.322578	0.161289	-0.818059	4.08047	-0.200481	0.841104	NA	Not DEG
NONMMUG032178.2	73.4148	35.1954	42.0304	28.2455	68.6579	536.125	50.2135	211.009	130.611	-2.06941	0.796981	-2.59657	0.00941605	0.532371	Down
NONMMUG029718.2	75.3217	90.8268	65.047	3.53069	62.0743	6.77414	77.0652	24.1264	50.5958	1.67622	0.887356	1.889	0.0588912	0.999731	Not DEG
NONMMUG035315.2	49.5788	0	0	0	0	0	16.5263	0	8.26314	6.59645	2.5224	2.61514	0.00891896	0.524399	Up
NONMMUG014085.2	143.016	334.924	442.319	391.906	237.011	433.545	306.753	354.154	330.454	-0.207686	0.459194	-0.452284	0.651064	0.999731	Not DEG
NONMMUG043996.2	2.86032	4.54134	2.00145	1.76534	9.40519	3.87094	3.13437	5.01382	4.0741	-0.68064	1.75123	-0.388665	0.697524	NA	Not DEG
NONMMUG045463.2	15.255	0	0	10.5921	0	19.3547	5.08501	9.98225	7.53363	-0.965869	2.06434	-0.467882	0.639869	0.999731	Not DEG
NONMMUG085555.1	0	0	2.00145	0	0	0	0.667149	0	0.333574	1.9693	4.04091	0.487342	0.626016	NA	Not DEG
NONMMUG014306.2	5.72063	3.40601	11.008	17.6534	5.64312	3.87094	6.71153	9.05583	7.88368	-0.431974	1.35962	-0.317716	0.7507	0.999731	Not DEG
NONMMUG000492.2	0	0	0	0	9.40519	0	0	3.13506	1.56753	-4.0522	3.93303	-1.0303	0.302869	NA	Not DEG
NONMMUG013670.2	0	0	0	2.64801	0	0	0	0.882671	0.441336	-2.23116	3.99879	-0.557959	0.576872	NA	Not DEG
NONMMUG028744.2	0	0	1.00072	0	0.940519	0	0.333574	0.313506	0.32354	0.143722	4.08047	0.0352219	0.971903	NA	Not DEG
NONMMUG030309.2	36.2307	27.248	52.0376	19.4188	61.1337	40.6448	38.5054	40.3991	39.4523	-0.0670277	0.711057	-0.0942648	0.924899	0.999731	Not DEG
NONMMUG016581.2	0	0	0	0	0	2.9032	0	0.967735	0.483867	-2.35177	3.99149	-0.589196	0.55573	NA	Not DEG
NONMMUG057223.1	0	0	3.00217	0	0	0	1.00072	0	0.500361	2.55269	3.99681	0.638681	0.52303	NA	Not DEG
NONMMUG024973.2	47.672	88.5562	120.087	42.3682	36.6802	47.419	85.4383	42.1558	63.7971	1.01868	0.580368	1.75523	0.0792197	0.999731	Not DEG
NONMMUG090533.1	38.1376	7.94735	8.00578	22.0668	0.940519	25.1611	18.0302	16.0561	17.0432	0.170402	1.19838	0.142194	0.886927	0.999731	Not DEG
NONMMUG073131.1	6.67407	1.13534	0	0	0	2.9032	2.60314	0.967735	1.78544	1.43822	3.28183	0.438238	0.661214	NA	Not DEG
NONMMUG082376.1	0	0	0	0	0	3.87094	0	1.29031	0.645156	-2.76799	3.97043	-0.697153	0.485707	NA	Not DEG
NONMMUG015210.2	25.7429	22.7067	41.0296	40.6029	33.8587	4.83867	29.8264	26.4334	28.1299	0.173248	0.887068	0.195305	0.845154	0.999731	Not DEG
NONMMUG009767.2	0	12.4887	5.00361	9.70939	19.7509	8.70961	5.83077	12.7233	9.27703	-1.13631	1.44454	-0.786621	0.431504	0.999731	Not DEG
NONMMUG063242.1	35.2772	15.8947	41.0296	35.3069	37.6208	29.032	30.7339	33.9866	32.3602	-0.142453	0.72661	-0.196051	0.84457	0.999731	Not DEG
NONMMUG020215.2	134.435	91.9622	132.095	107.686	125.089	119.031	119.497	117.269	118.383	0.0283901	0.436746	0.0650038	0.948171	0.999731	Not DEG
NONMMUG038189.2	0	13.624	0	0	37.6208	1.93547	4.54134	13.1854	8.86338	-1.54786	2.08222	-0.74337	0.457258	0.999731	Not DEG
NONMMUG028572.2	16.2085	12.4887	9.00651	3.53069	23.513	9.67735	12.5679	12.2403	12.4041	0.0402097	1.13715	0.0353601	0.971793	0.999731	Not DEG
NONMMUG006658.3	63.8804	151	30.0217	128.87	102.517	131.612	81.6339	121	101.317	-0.570623	0.595899	-0.957584	0.338273	0.999731	Not DEG
NONMMUG094803.1	0	0	0	0	0	3.87094	0	1.29031	0.645156	-2.76799	3.97043	-0.697153	0.485707	NA	Not DEG
NONMMUG039519.2	225.965	146.458	236.171	305.404	157.067	153.87	202.865	205.447	204.156	-0.0181124	0.441378	-0.0410361	0.967267	0.999731	Not DEG
NONMMUG038397.2	0	0	2.00145	0	0	0	0.667149	0	0.333574	1.9693	4.04091	0.487342	0.626016	NA	Not DEG
NONMMUG001758.3	44.8116	26.1127	34.0246	3.53069	23.513	8.70961	34.983	11.9178	23.4504	1.5568	0.918975	1.69406	0.0902531	0.999731	Not DEG
NONMMUG010940.2	146.83	102.18	190.137	110.334	60.1932	74.5156	146.382	81.6809	114.032	0.841691	0.486225	1.73107	0.0834391	0.999731	Not DEG
NONMMUG016788.2	0	0	0	7.06137	0	15.4838	0	7.51504	3.75752	-5.31351	2.73774	-1.94084	0.052278	NA	Not DEG
NONMMUG030911.2	15.255	18.1654	0	18.5361	0	0.967735	11.1401	6.50128	8.8207	0.771876	1.84022	0.419447	0.67489	0.999731	Not DEG
NONMMUG080877.1	0	0	1.00072	0	0	0	0.333574	0	0.166787	1.10549	4.08047	0.270923	0.78645	NA	Not DEG
NONMMUG092848.1	8.58095	0	26.0188	3.53069	0	0	11.5332	1.1769	6.35507	3.27845	2.12491	1.54286	0.122864	0.999731	Not DEG
NONMMUG094654.1	3.81376	0	0	0	0	0	1.27125	0	0.635626	2.90211	3.97762	0.729611	0.465628	NA	Not DEG
NONMMUG039877.2	0.953439	0	0	0	0	0	0.317813	0	0.158907	1.10549	4.08047	0.270923	0.78645	NA	Not DEG
NONMMUG064105.1	0	0	0	0	12.2267	0	0	4.07558	2.03779	-4.43079	3.84405	-1.15264	0.249059	NA	Not DEG
NONMMUG072620.1	7.62751	4.54134	9.00651	12.3574	8.46467	0	7.05845	6.94069	6.99957	0.0234364	1.58652	0.0147722	0.988214	0.999731	Not DEG
NONMMUG069646.1	1.90688	0	0	0	0	0	0.635626	0	0.317813	1.90889	4.04654	0.471733	0.637118	NA	Not DEG
NONMMUG080305.1	0	0	0	0.882671	0	0	0	0.294224	0.147112	-0.818059	4.08047	-0.200481	0.841104	NA	Not DEG
NONMMUG000567.2	0	34.0601	4.00289	8.82671	7.52415	11.6128	12.6877	9.32123	11.0044	0.43843	1.47158	0.297931	0.765756	0.999731	Not DEG
NONMMUG039226.2	21.9291	4.54134	4.00289	0	7.52415	13.5483	10.1578	7.02415	8.59096	0.538955	1.55699	0.346152	0.729229	0.999731	Not DEG
NONMMUG096350.1	7.62751	0	25.0181	0	8.46467	7.74188	10.8819	5.40218	8.14202	1.01537	1.77689	0.57143	0.567709	0.999731	Not DEG
NONMMUG089039.1	61.9735	7.94735	12.0087	22.9495	3.76208	12.5805	27.3099	13.0974	20.2036	1.06154	1.08104	0.981966	0.326117	0.999731	Not DEG
NONMMUG094671.1	0	17.03	0	0	0	9.67735	5.67668	3.22578	4.45123	0.813424	2.72247	0.298782	0.765107	NA	Not DEG
NONMMUG016351.2	15.255	13.624	4.00289	0	0	15.4838	10.9606	5.16125	8.06095	1.09075	1.78695	0.610398	0.541598	0.999731	Not DEG
NONMMUG018638.2	72.4614	49.9548	44.0318	42.3682	25.394	70.6446	55.4826	46.1356	50.8091	0.267651	0.640241	0.418047	0.675913	0.999731	Not DEG
NONMMUG019641.2	30.5101	49.9548	24.0173	95.3285	45.1449	66.7737	34.8274	69.0824	51.9549	-0.991681	0.629913	-1.57431	0.115415	0.999731	Not DEG
NONMMUG043769.2	28.6032	14.7594	9.00651	15.8881	13.1673	12.5805	17.4563	13.8786	15.6675	0.332393	0.977691	0.339977	0.733874	0.999731	Not DEG
NONMMUG011702.2	37.1841	46.5487	92.0665	61.787	24.4535	36.7739	58.5998	41.0048	49.8023	0.514206	0.669496	0.76805	0.442458	0.999731	Not DEG
NONMMUG037716.2	11.4413	27.248	15.0108	0	21.6319	27.0966	17.9001	16.2428	17.0714	0.140083	1.23924	0.11304	0.909999	0.999731	Not DEG
NONMMUG040803.2	1.90688	5.67668	12.0087	0	1.88104	0	6.53074	0.627013	3.57888	3.38573	2.31173	1.46458	0.143034	NA	Not DEG
NONMMUG071951.1	0	3.40601	0	0	3.76208	0	1.13534	1.25403	1.19468	-0.154732	3.87617	-0.0399188	0.968158	NA	Not DEG
NONMMUG069371.1	15.255	11.3534	8.00578	7.06137	1.88104	22.2579	11.5381	10.4001	10.9691	0.152537	1.23923	0.12309	0.902036	0.999731	Not DEG
NONMMUG006314.2	0	4.54134	5.00361	3.53069	0	2.9032	3.18165	2.14463	2.66314	0.564104	2.50107	0.225546	0.821555	NA	Not DEG
NONMMUG082114.1	0	0	0	0	3.76208	0	0	1.25403	0.627013	-2.72965	3.97213	-0.687202	0.491955	NA	Not DEG
NONMMUG045257.2	30.5101	49.9548	36.026	49.4296	62.0743	39.6771	38.8303	50.3937	44.612	-0.378347	0.622451	-0.607834	0.543298	0.999731	Not DEG
NONMMUG075088.1	6.67407	9.08268	3.00217	1.76534	0	0.967735	6.25297	0.911026	3.582	2.76934	2.06617	1.34033	0.180139	NA	Not DEG
NONMMUG057505.1	14.3016	0	0	5.29603	0	0	4.7672	1.76534	3.26627	1.43094	2.96337	0.482874	0.629185	NA	Not DEG
NONMMUG049748.1	0	0	7.00506	0	0	0	2.33502	0	1.16751	3.77304	3.94567	0.956248	0.338947	NA	Not DEG
NONMMUG022013.2	9.53439	12.4887	4.00289	2.64801	1.88104	0	8.67532	1.50968	5.0925	2.51227	1.77376	1.41636	0.156671	0.999731	Not DEG
NONMMUG037566.2	2.86032	9.08268	24.0173	7.94404	4.7026	15.4838	11.9868	9.3768	10.6818	0.355346	1.24849	0.28462	0.775936	0.999731	Not DEG
NONMMUG044942.2	0	1.13534	0	0	0.940519	4.83867	0.378445	1.9264	1.15242	-2.38585	3.88275	-0.614475	0.538901	NA	Not DEG
NONMMUG025738.2	7.62751	6.81201	7.00506	5.29603	5.64312	7.74188	7.14819	6.22701	6.6876	0.200428	1.34873	0.148605	0.881865	0.999731	Not DEG
NONMMUG066235.1	0	0	0	0	29.1561	3.87094	0	11.009	5.50451	-5.8643	2.4911	-2.3541	0.0185674	0.678578	Down
NONMMUG082352.1	0	0	9.00651	3.53069	11.2862	18.387	3.00217	11.068	7.03506	-1.87574	1.81205	-1.03515	0.3006	0.999731	Not DEG
NONMMUG064565.1	7.62751	9.08268	8.00578	14.1227	30.0966	17.4192	8.23866	20.5462	14.3924	-1.31922	1.00082	-1.31814	0.187456	0.999731	Not DEG
NONMMUG019016.2	0	0	0	0	0	4.83867	0	1.61289	0.806445	-3.09066	3.95775	-0.780912	0.434854	NA	Not DEG
NONMMUG092514.1	0	22.7067	0	0	0	0	7.5689	0	3.78445	5.46467	3.1178	1.75273	0.079648	NA	Not DEG
NONMMUG053849.1	35.2772	12.4887	7.00506	7.94404	9.40519	0	18.257	5.78308	12.02	1.65738	1.34728	1.23017	0.218635	0.999731	Not DEG
NONMMUG036284.2	99.1577	141.917	167.121	140.345	119.446	95.8057	136.065	118.532	127.299	0.198115	0.447127	0.443084	0.657705	0.999731	Not DEG
NONMMUG055276.2	3.81376	4.54134	1.00072	14.1227	5.64312	3.87094	3.11861	7.87893	5.49877	-1.34327	1.58377	-0.848145	0.396357	0.999731	Not DEG
NONMMUG022249.2	9.53439	42.0074	10.0072	249.796	3.76208	317.417	20.5163	190.325	105.421	-3.21952	0.941275	-3.42038	0.000625327	0.141299	Down
NONMMUG064828.1	2.86032	0	1.00072	1.76534	7.52415	0	1.28701	3.0965	2.19176	-1.2542	2.74479	-0.456936	0.647717	NA	Not DEG
NONMMUG033861.2	0	0	0	8.82671	0	3.87094	0	4.23255	2.11628	-4.48674	3.342	-1.34253	0.179424	NA	Not DEG
NONMMUG007901.2	41.9513	45.4134	63.0455	60.0217	76.1821	49.3545	50.1368	61.8527	55.9947	-0.302899	0.569896	-0.531499	0.595073	0.999731	Not DEG
NONMMUG017127.2	0	0	0	0	0	1.93547	0	0.645156	0.322578	-1.76457	4.03337	-0.437493	0.661754	NA	Not DEG
NONMMUG070783.1	17.1619	2.27067	14.0101	13.2401	13.1673	17.4192	11.1476	14.6089	12.8782	-0.383529	1.11838	-0.342933	0.731649	0.999731	Not DEG
NONMMUG070863.1	0	1.13534	0	0	0	0	0.378445	0	0.189223	1.10549	4.08047	0.270923	0.78645	NA	Not DEG
NONMMUG005502.2	2.86032	10.218	9.00651	2.64801	8.46467	7.74188	7.36161	6.28485	6.82323	0.226555	1.4107	0.160598	0.87241	0.999731	Not DEG
NONMMUG037318.2	0	0	0	0	0	3.87094	0	1.29031	0.645156	-2.76799	3.97043	-0.697153	0.485707	NA	Not DEG
NONMMUG010559.3	286.032	258.856	234.169	228.612	227.606	383.223	259.686	279.813	269.75	-0.107269	0.382823	-0.280206	0.77932	0.999731	Not DEG
NONMMUG078069.2	0	3.40601	1.00072	1.76534	0.940519	9.67735	1.46891	4.12774	2.79832	-1.50633	2.32855	-0.646896	0.517699	NA	Not DEG
NONMMUG013379.2	10.4878	0	12.0087	35.3069	45.1449	5.80641	7.49883	28.7527	18.1258	-1.93082	1.21253	-1.59238	0.111298	0.999731	Not DEG
NONMMUG005483.2	15.255	19.3007	24.0173	15.0054	15.0483	23.2256	19.5244	17.7598	18.6421	0.137115	0.876406	0.156452	0.875677	0.999731	Not DEG
NONMMUG027056.2	21.9291	0	28.0202	64.435	97.814	58.0641	16.6498	73.4377	45.0437	-2.13405	0.904267	-2.35997	0.0182762	0.675049	Down
NONMMUG057800.1	0	0	0	1.76534	0	12.5805	0	4.78196	2.39098	-4.66056	3.23708	-1.43974	0.149941	NA	Not DEG
NONMMUG068207.1	0	0	1.00072	0	0.940519	0	0.333574	0.313506	0.32354	0.143722	4.08047	0.0352219	0.971903	NA	Not DEG
NONMMUG035857.2	2.86032	84.0148	39.0282	25.5975	11.2862	90.967	41.9678	42.6169	42.2923	-0.0241388	1.0001	-0.0241364	0.980744	0.999731	Not DEG
NONMMUG047799.1	0	0	0	0	0	6.77414	0	2.25805	1.12902	-3.57695	3.94323	-0.907111	0.364348	NA	Not DEG
NONMMUG069006.1	6.67407	4.54134	0	4.41336	15.9888	6.77414	3.73847	9.05877	6.39862	-1.27562	1.63395	-0.780696	0.434981	0.999731	Not DEG
NONMMUG093225.1	2.86032	0	0	0	0	0	0.953439	0	0.47672	2.48945	4.0008	0.62224	0.533784	NA	Not DEG
NONMMUG042089.2	7.62751	1.13534	24.0173	7.94404	1.88104	19.3547	10.9267	9.72659	10.3267	0.172496	1.39357	0.123779	0.90149	0.999731	Not DEG
NONMMUG070958.1	23.836	40.8721	28.0202	24.7148	14.1078	28.0643	30.9094	22.2956	26.6025	0.469353	0.774298	0.606166	0.544405	0.999731	Not DEG
NONMMUG068956.1	0	0	6.00434	0	0	0	2.00145	0	1.00072	3.55091	3.95211	0.898486	0.368926	NA	Not DEG
NONMMUG048007.1	3.81376	2.27067	4.00289	10.5921	6.58363	3.87094	3.36244	7.01554	5.18899	-1.0589	1.55357	-0.68159	0.495499	0.999731	Not DEG
NONMMUG007486.2	125.854	49.9548	161.116	170.356	151.424	100.644	112.308	140.808	126.558	-0.324892	0.525167	-0.618645	0.536151	0.999731	Not DEG
NONMMUG046033.2	0	0	0	0	26.3345	0	0	8.77818	4.38909	-5.53779	2.98671	-1.85414	0.0637187	NA	Not DEG
NONMMUG020552.2	16.2085	30.6541	9.00651	16.7708	6.58363	18.387	18.623	13.9138	16.2684	0.417078	1.00223	0.416149	0.677301	0.999731	Not DEG
NONMMUG067208.1	0	0	0	7.06137	0	19.3547	0	8.80535	4.40268	-5.54196	2.61025	-2.12316	0.0337407	NA	Down
NONMMUG072402.1	11.4413	5.67668	12.0087	22.9495	1.88104	1.93547	9.70887	8.92199	9.31543	0.119877	1.38975	0.0862582	0.931261	0.999731	Not DEG
NONMMUG031958.2	44.8116	54.4961	52.0376	44.1336	48.907	58.0641	50.4484	50.3682	50.4083	0.00211181	0.573871	0.00367993	0.997064	0.999731	Not DEG
NONMMUG067939.1	0	0	5.00361	0	0	0	1.66787	0	0.833936	3.28825	3.9611	0.830137	0.406462	NA	Not DEG
NONMMUG004440.2	2.86032	17.03	5.00361	7.06137	11.2862	0	8.29799	6.11587	7.20693	0.433404	1.62324	0.267	0.789469	0.999731	Not DEG
NONMMUG037568.2	1.90688	2.27067	2.00145	7.94404	1.88104	2.9032	2.05966	4.24276	3.15121	-1.04661	1.93779	-0.540103	0.589126	NA	Not DEG
NONMMUG007301.2	264.103	189.601	180.13	234.791	170.234	243.869	211.278	216.298	213.788	-0.0333778	0.390466	-0.085482	0.931878	0.999731	Not DEG
NONMMUG090883.1	2.86032	4.54134	7.00506	2.64801	3.76208	0	4.80224	2.1367	3.46947	1.16489	2.02042	0.576556	0.564239	NA	Not DEG
NONMMUG016024.2	0	0	0	1.76534	0	0	0	0.588448	0.294224	-1.64922	4.04373	-0.407847	0.683386	NA	Not DEG
NONMMUG087019.1	0	10.218	0	6.1787	0	5.80641	3.40601	3.99504	3.70052	-0.240289	2.53232	-0.0948889	0.924403	NA	Not DEG
NONMMUG021238.2	9.53439	10.218	8.00578	10.5921	9.40519	9.67735	9.25273	9.89153	9.57213	-0.0972278	1.15037	-0.0845184	0.932644	0.999731	Not DEG
NONMMUG064625.1	11.4413	0	4.00289	6.1787	7.52415	0	5.14805	4.56762	4.85784	0.176841	2.04818	0.0863403	0.931196	NA	Not DEG
NONMMUG022247.2	0	0	0	0	2.82156	0	0	0.940519	0.47026	-2.31429	3.9937	-0.579485	0.562262	NA	Not DEG
NONMMUG056625.1	0	0	0	0	0	15.4838	0	5.16125	2.58063	-4.77059	3.53795	-1.34841	0.177527	NA	Not DEG
NONMMUG040668.2	0	2.27067	0	0	0	3.87094	0.75689	1.29031	1.0236	-0.783536	3.91559	-0.200107	0.841397	NA	Not DEG
NONMMUG090407.1	3.81376	6.81201	0	0	0	2.9032	3.54192	0.967735	2.25483	1.8775	2.97534	0.63102	0.528028	NA	Not DEG
NONMMUG096533.1	30.5101	35.1954	21.0152	9.70939	6.58363	2.9032	28.9069	6.39874	17.6528	2.1702	0.964384	2.25035	0.0244267	0.746592	Up
NONMMUG020443.2	39.091	19.3007	21.0152	45.8989	21.6319	82.2574	26.469	49.9294	38.1992	-0.912474	0.750167	-1.21636	0.223847	0.999731	Not DEG
NONMMUG075135.1	65.7873	71.5261	49.0354	0	73.3605	88.0638	62.1163	53.8081	57.9622	0.20791	0.989887	0.210034	0.833641	0.999731	Not DEG
NONMMUG044818.2	0	0	0	0	0	6.77414	0	2.25805	1.12902	-3.57695	3.94323	-0.907111	0.364348	NA	Not DEG
NONMMUG049905.1	0	6.81201	0	20.3014	18.8104	0	2.27067	13.0373	7.65397	-2.54403	2.01609	-1.26186	0.206999	0.999731	Not DEG
NONMMUG010121.2	24.7894	13.624	3.00217	7.06137	21.6319	2.9032	13.8052	10.5322	12.1687	0.391633	1.24499	0.314568	0.75309	0.999731	Not DEG
NONMMUG031060.3	149.69	158.947	120.087	142.993	136.375	0	142.908	93.1227	118.015	0.617723	1.69513	0.364411	0.715551	0.999731	Not DEG
NONMMUG021303.2	0	0	0	0	2.82156	3.87094	0	2.23083	1.11542	-3.56014	3.94366	-0.902751	0.366658	NA	Not DEG
NONMMUG052597.1	2.86032	18.1654	0	0	0	0	7.00856	0	3.50428	5.35362	2.83701	1.88706	0.059152	NA	Not DEG
NONMMUG014978.2	27.6497	37.4661	32.0231	27.3628	37.6208	60.9673	32.3796	41.9836	37.1816	-0.374834	0.682248	-0.54941	0.582724	0.999731	Not DEG
NONMMUG088982.1	267.916	378.067	256.185	263.036	213.498	232.256	300.723	236.263	268.493	0.347225	0.364751	0.95195	0.341123	0.999731	Not DEG
NONMMUG079811.1	0	2.27067	0	0	0	0	0.75689	0	0.378445	2.12818	4.02714	0.528459	0.597181	NA	Not DEG
NONMMUG050377.1	0	0	0	0	0	7.74188	0	2.58063	1.29031	-3.76987	3.93869	-0.957138	0.338498	NA	Not DEG
NONMMUG058769.1	2.86032	0	0	0	0	0	0.953439	0	0.47672	2.48945	4.0008	0.62224	0.533784	NA	Not DEG
NONMMUG078664.1	0	3.40601	0	0	0	0	1.13534	0	0.567668	2.71864	3.98713	0.681855	0.495331	NA	Not DEG
NONMMUG067641.1	0	0	1.00072	0	0	0	0.333574	0	0.166787	1.10549	4.08047	0.270923	0.78645	NA	Not DEG
NONMMUG050421.1	23.836	0	18.013	47.6643	15.9888	49.3545	13.9497	37.6692	25.8094	-1.42657	1.07521	-1.32679	0.18458	0.999731	Not DEG
NONMMUG023161.2	0	0	0	0	0	19.3547	0	6.45156	3.22578	-5.09259	3.28401	-1.55072	0.120968	NA	Not DEG
NONMMUG002640.2	21.9291	45.4134	87.0629	29.1282	41.3828	64.8382	51.4685	45.1164	48.2924	0.190705	0.703448	0.2711	0.786314	0.999731	Not DEG
NONMMUG064333.1	866.676	751.592	784.567	683.188	733.605	707.414	800.945	708.069	754.507	0.177955	0.291839	0.609771	0.542013	0.999731	Not DEG
NONMMUG010161.2	375.655	307.676	342.247	365.426	341.408	392.9	341.859	366.578	354.219	-0.100354	0.32784	-0.306106	0.759524	0.999731	Not DEG
NONMMUG071235.1	0	5.67668	0	0	0	0	1.89223	0	0.946113	3.46031	3.95503	0.874915	0.38162	NA	Not DEG
NONMMUG013407.2	14.3016	36.3307	21.0152	40.6029	8.46467	3.87094	23.8825	17.6462	20.7643	0.430873	1.03418	0.416633	0.676947	0.999731	Not DEG
NONMMUG068552.1	7.62751	10.218	10.0072	14.1227	0	0	9.28425	4.70758	6.99592	0.973355	1.82311	0.533899	0.593412	0.999731	Not DEG
NONMMUG047873.1	11.4413	0	0	17.6534	0	0	3.81376	5.88448	4.84912	-0.622404	2.65064	-0.234813	0.814354	NA	Not DEG
NONMMUG042256.2	18.1153	12.4887	17.0123	7.94404	9.40519	22.2579	15.8721	13.2024	14.5372	0.269233	1.00764	0.267192	0.789321	0.999731	Not DEG
NONMMUG060917.1	34.3238	1.13534	12.0087	18.5361	9.40519	16.4515	15.8226	14.7976	15.3101	0.101743	1.17109	0.0868792	0.930768	0.999731	Not DEG
NONMMUG026975.2	287.939	158.947	21.0152	411.325	417.591	374.513	155.967	401.143	278.555	-1.36248	0.621535	-2.19211	0.0283713	0.81915	Down
NONMMUG024328.2	48.6254	63.5788	63.0455	81.2058	53.6096	98.7089	58.4166	77.8414	68.129	-0.414786	0.539245	-0.769197	0.441776	0.999731	Not DEG
NONMMUG068273.1	0	0	0	0	0	1.93547	0	0.645156	0.322578	-1.76457	4.03337	-0.437493	0.661754	NA	Not DEG
NONMMUG009550.2	27.6497	12.4887	13.0094	10.5921	13.1673	25.1611	17.7159	16.3068	17.0114	0.12386	0.956847	0.129446	0.897005	0.999731	Not DEG
NONMMUG093122.1	23.836	20.436	32.0231	3.53069	15.0483	1.93547	25.4317	6.83815	16.1349	1.89622	1.07407	1.76545	0.0774878	0.999731	Not DEG
NONMMUG077767.1	2.86032	0	0	11.4747	0	4.83867	0.953439	5.4378	3.19562	-2.49242	2.64119	-0.943674	0.345336	NA	Not DEG
NONMMUG029666.2	94.3905	89.6915	57.0412	125.339	91.2304	141.289	80.3744	119.286	99.8304	-0.569823	0.482439	-1.18113	0.237551	0.999731	Not DEG
NONMMUG012513.2	6.67407	0	0	0	0	0	2.22469	0	1.11235	3.70621	3.9475	0.938875	0.347795	NA	Not DEG
NONMMUG023775.2	27.6497	20.436	25.0181	69.731	43.2639	35.8062	24.3679	49.6004	36.9842	-1.0247	0.679705	-1.50757	0.131665	0.999731	Not DEG
NONMMUG095008.1	0	0	0	0	0	6.77414	0	2.25805	1.12902	-3.57695	3.94323	-0.907111	0.364348	NA	Not DEG
NONMMUG031315.2	59.1132	73.7968	62.0448	73.2617	73.3605	62.9027	64.9849	69.8417	67.4133	-0.105053	0.513441	-0.204605	0.837881	0.999731	Not DEG
NONMMUG083067.1	0	0	3.00217	7.06137	0	0	1.00072	2.35379	1.67726	-1.23294	3.728	-0.330725	0.740852	NA	Not DEG
NONMMUG027804.2	4.7672	3.40601	4.00289	1.76534	10.3457	2.9032	4.0587	5.00475	4.53173	-0.299297	1.67562	-0.178618	0.858237	NA	Not DEG
NONMMUG014561.2	2.86032	0	6.00434	0	0	7.74188	2.95488	2.58063	2.76776	0.20298	2.78548	0.0728708	0.941909	NA	Not DEG
NONMMUG087563.1	3.81376	3.40601	4.00289	0	0	0.967735	3.74088	0.322578	2.03173	3.48987	2.78882	1.25138	0.210795	NA	Not DEG
NONMMUG022674.2	20.0222	24.9774	10.0072	15.0054	23.513	45.4835	18.3356	28.0006	23.1681	-0.611474	0.869666	-0.703113	0.481985	0.999731	Not DEG
NONMMUG041897.2	53.3926	31.7894	71.0513	60.0217	46.0854	69.6769	52.0778	58.5947	55.3362	-0.168077	0.596428	-0.281807	0.778092	0.999731	Not DEG
NONMMUG077319.1	0	0	6.00434	0	0	0	2.00145	0	1.00072	3.55091	3.95211	0.898486	0.368926	NA	Not DEG
NONMMUG089080.1	5.72063	9.08268	11.008	0	15.0483	12.5805	8.60376	9.20962	8.90669	-0.0967258	1.47756	-0.0654634	0.947805	0.999731	Not DEG
NONMMUG018236.2	2.86032	277.022	276.199	265.684	228.546	0	185.361	164.743	175.052	0.17	2.2472	0.0756499	0.939698	0.999731	Not DEG
NONMMUG089707.1	0	0	8.00578	0	0	0	2.66859	0	1.3343	3.96548	3.94083	1.00625	0.314294	NA	Not DEG
NONMMUG014495.2	6.67407	73.7968	65.047	80.3231	18.8104	24.1934	48.506	41.1089	44.8074	0.235355	0.881253	0.267068	0.789417	0.999731	Not DEG
NONMMUG056212.1	14.3016	22.7067	8.00578	8.82671	19.7509	18.387	15.0047	15.6549	15.3298	-0.063057	0.996618	-0.063271	0.949551	0.999731	Not DEG
NONMMUG048752.1	9.53439	19.3007	18.013	43.2509	38.5613	3.87094	15.616	28.561	22.0885	-0.874427	0.994247	-0.879487	0.379137	0.999731	Not DEG
NONMMUG074498.1	0	0	1.00072	0.882671	0	0	0.333574	0.294224	0.313899	0.143722	4.08047	0.0352219	0.971903	NA	Not DEG
NONMMUG023054.2	0	0	8.00578	15.0054	0	7.74188	2.66859	7.58243	5.12551	-1.50356	2.27409	-0.661172	0.508502	0.999731	Not DEG
NONMMUG022192.2	1938.34	2791.79	2267.64	2211.09	2476.39	2373.85	2332.59	2353.78	2343.18	-0.0131496	0.289741	-0.0453839	0.963801	0.999731	Not DEG
NONMMUG060369.1	14.3016	0	26.0188	7.94404	14.1078	23.2256	13.4401	15.0925	14.2663	-0.162072	1.28553	-0.126074	0.899673	0.999731	Not DEG
NONMMUG030542.3	2.86032	0	2.00145	5.29603	15.9888	25.1611	1.62059	15.482	8.55129	-3.22937	1.50881	-2.14034	0.0323274	0.856729	Down
NONMMUG080598.2	0	0	0	11.4747	0	0	0	3.82491	1.91245	-4.34133	3.92827	-1.10515	0.269094	NA	Not DEG
NONMMUG039382.2	24.7894	17.03	0	0.882671	0	0	13.9398	0.294224	7.11702	5.38739	2.16443	2.48906	0.0128083	0.606172	Up
NONMMUG057611.1	0	0	2.00145	2.64801	0	15.4838	0.667149	6.04392	3.35554	-3.16777	2.66278	-1.18965	0.234185	NA	Not DEG
NONMMUG074176.1	5.72063	4.54134	0	0	0	0	3.42066	0	1.71033	4.32198	3.61328	1.19614	0.231643	NA	Not DEG
NONMMUG012973.2	0	0	0	0	0	3.87094	0	1.29031	0.645156	-2.76799	3.97043	-0.697153	0.485707	NA	Not DEG
NONMMUG080679.2	0	0	0	0	0	8.70961	0	2.9032	1.4516	-3.94001	3.93515	-1.00123	0.316713	NA	Not DEG
NONMMUG095594.1	95.3439	66.9848	54.039	25.5975	28.2156	42.5803	72.1226	32.1311	52.1268	1.16827	0.603392	1.93618	0.0528458	0.999731	Not DEG
NONMMUG012989.3	12.3947	29.5187	21.0152	13.2401	33.8587	3.87094	20.9762	16.9899	18.9831	0.301467	1.01457	0.297137	0.766362	0.999731	Not DEG
NONMMUG048669.1	0	0	0	0	0	5.80641	0	1.93547	0.967735	-3.35419	3.94929	-0.849316	0.395705	NA	Not DEG
NONMMUG055064.1	0	0	0	4.41336	0	0	0	1.47112	0.73556	-2.96548	3.96234	-0.748416	0.454209	NA	Not DEG
NONMMUG040511.2	5.72063	15.8947	34.0246	12.3574	2.82156	24.1934	18.5466	13.1241	15.8354	0.499591	1.12696	0.443307	0.657544	0.999731	Not DEG
NONMMUG073599.1	3.81376	35.1954	12.0087	35.3069	15.9888	2.9032	17.0059	18.0663	17.5361	-0.0947159	1.1562	-0.0819199	0.93471	0.999731	Not DEG
NONMMUG018240.2	0	3.40601	2.00145	14.1227	9.40519	0	1.80248	7.84264	4.82256	-2.13635	2.07914	-1.02752	0.304176	NA	Not DEG
NONMMUG071544.1	0	0	0	7.94404	0	0	0	2.64801	1.32401	-3.81158	3.93778	-0.967952	0.333068	NA	Not DEG
NONMMUG027218.2	28.6032	0	0	14.1227	9.40519	0.967735	9.53439	8.16522	8.84981	0.226721	1.85738	0.122065	0.902847	0.999731	Not DEG
NONMMUG013409.2	93.437	84.0148	65.047	60.0217	27.2751	79.3542	80.8329	55.5503	68.1916	0.541444	0.583858	0.927356	0.353741	0.999731	Not DEG
NONMMUG074911.1	10.4878	5.67668	0	6.1787	18.8104	4.83867	5.38817	9.94259	7.66538	-0.88171	1.55991	-0.565232	0.571916	0.999731	Not DEG
NONMMUG016111.2	14.3016	22.7067	24.0173	11.4747	18.8104	9.67735	20.3419	13.3208	16.8313	0.60966	0.928916	0.656313	0.511622	0.999731	Not DEG
NONMMUG085166.1	0	1.13534	0	0	0	0	0.378445	0	0.189223	1.10549	4.08047	0.270923	0.78645	NA	Not DEG
NONMMUG075348.1	30.5101	36.3307	2.00145	29.1282	7.52415	0	22.9474	12.2174	17.5824	0.905266	1.35953	0.665869	0.505495	0.999731	Not DEG
NONMMUG018836.2	484.347	400.773	283.205	374.253	347.052	230.321	389.442	317.208	353.325	0.295808	0.379514	0.779438	0.435722	0.999731	Not DEG
NONMMUG033300.2	10.4878	27.248	16.0116	11.4747	20.6914	22.2579	17.9158	18.1413	18.0286	-0.0207508	0.924175	-0.0224533	0.982086	0.999731	Not DEG
NONMMUG004792.2	6.67407	9.08268	19.0137	6.1787	8.46467	43.5481	11.5902	19.3971	15.4937	-0.740489	1.11981	-0.661265	0.508442	0.999731	Not DEG
NONMMUG014040.2	18.1153	10.218	5.00361	24.7148	11.2862	34.8384	11.1123	23.6132	17.3627	-1.08472	0.991659	-1.09384	0.274023	0.999731	Not DEG
NONMMUG007054.2	349.912	313.353	6.00434	6.1787	372.446	5.80641	223.09	128.144	175.617	0.799891	1.92336	0.415883	0.677496	0.999731	Not DEG
NONMMUG089142.1	0	0	0	0	0	3.87094	0	1.29031	0.645156	-2.76799	3.97043	-0.697153	0.485707	NA	Not DEG
NONMMUG025499.2	42.9048	3.40601	62.0448	104.155	5.64312	20.3224	36.1185	43.3736	39.7461	-0.263236	1.04713	-0.251387	0.801515	0.999731	Not DEG
NONMMUG023401.2	0	0	0	0	4.7026	0	0	1.56753	0.783766	-3.05179	3.95914	-0.770821	0.440813	NA	Not DEG
NONMMUG087042.1	29.5566	43.1427	65.047	23.8321	33.8587	47.419	45.9154	35.0366	40.476	0.390995	0.678217	0.576504	0.564275	0.999731	Not DEG
NONMMUG057010.1	0	0	0	0	15.0483	0	0	5.0161	2.50805	-4.73037	3.57153	-1.32447	0.185347	NA	Not DEG
NONMMUG009373.2	7.62751	6.81201	27.0195	1.76534	47.9665	0	13.8197	16.5773	15.1985	-0.260984	1.47244	-0.177246	0.859315	0.999731	Not DEG
NONMMUG029727.2	75.3217	110.128	124.09	128.87	184.342	70.6446	103.18	127.952	115.566	-0.311242	0.509002	-0.611476	0.540885	0.999731	Not DEG
NONMMUG012632.2	42.9048	0	32.0231	14.1227	34.7992	10.6451	24.976	19.8557	22.4158	0.334326	1.17864	0.283655	0.776675	0.999731	Not DEG
NONMMUG092690.1	2.86032	1.13534	0	0.882671	3.76208	0	1.33188	1.54825	1.44007	-0.213663	3.2001	-0.0667677	0.946767	NA	Not DEG
NONMMUG089518.1	108.692	71.5261	65.047	128.87	99.695	147.096	81.7551	125.22	103.488	-0.613866	0.476239	-1.28899	0.197402	0.999731	Not DEG
NONMMUG079887.1	9.53439	10.218	2.00145	8.82671	8.46467	5.80641	7.25128	7.69926	7.47527	-0.0891789	1.35374	-0.0658761	0.947476	0.999731	Not DEG
NONMMUG020796.2	6.67407	11.3534	8.00578	31.7762	1.88104	2.9032	8.67774	12.1868	10.4323	-0.495526	1.35462	-0.365804	0.714511	0.999731	Not DEG
NONMMUG067967.1	0	1.13534	0	2.64801	0	0	0.378445	0.882671	0.630558	-1.26938	3.99879	-0.317441	0.750909	NA	Not DEG
NONMMUG048336.1	0	3.40601	0	0	0	0	1.13534	0	0.567668	2.71864	3.98713	0.681855	0.495331	NA	Not DEG
NONMMUG093574.1	12.3947	5.67668	31.0224	5.29603	7.52415	40.6448	16.3646	17.8217	17.0931	-0.118406	1.12884	-0.104892	0.916462	0.999731	Not DEG
NONMMUG007177.2	99.1577	108.992	189.137	147.406	166.472	144.192	132.429	152.69	142.559	-0.205079	0.444054	-0.461833	0.644201	0.999731	Not DEG
NONMMUG011979.2	0	13.624	13.0094	13.2401	0	2.9032	8.87781	5.38109	7.12945	0.716271	1.8638	0.384308	0.70075	0.999731	Not DEG
NONMMUG047930.1	19.0688	1.13534	0	11.4747	0	0	6.73471	3.82491	5.27981	0.815342	2.36863	0.344225	0.730677	0.999731	Not DEG
NONMMUG035573.2	21.9291	15.8947	16.0116	22.9495	21.6319	12.5805	17.9451	19.054	18.4996	-0.0862289	0.88268	-0.0976899	0.922179	0.999731	Not DEG
NONMMUG001880.2	0	15.8947	9.00651	0	0.940519	4.83867	8.3004	1.9264	5.1134	2.11145	2.07973	1.01525	0.309985	0.999731	Not DEG
NONMMUG029995.2	0	1.13534	0	0	0	0	0.378445	0	0.189223	1.10549	4.08047	0.270923	0.78645	NA	Not DEG
NONMMUG050189.1	0	0	2.00145	0	0	0	0.667149	0	0.333574	1.9693	4.04091	0.487342	0.626016	NA	Not DEG
NONMMUG050237.1	6.67407	5.67668	1.00072	35.3069	1.88104	0	4.45049	12.396	8.42323	-1.48096	1.726	-0.85803	0.390876	0.999731	Not DEG
NONMMUG041274.2	54.346	32.9247	32.0231	27.3628	63.0148	9.67735	39.7646	33.3516	36.5581	0.254516	0.800112	0.3181	0.750409	0.999731	Not DEG
NONMMUG057262.1	1.90688	0	0	5.29603	0	0	0.635626	1.76534	1.20048	-1.46264	3.91812	-0.373302	0.708924	NA	Not DEG
NONMMUG016292.2	77.2286	70.3908	85.0614	101.507	65.8363	115.16	77.5603	94.168	85.8641	-0.279449	0.494476	-0.565143	0.571977	0.999731	Not DEG
NONMMUG041155.2	78.182	129.428	116.084	101.507	94.0519	83.2252	107.898	92.9281	100.413	0.214083	0.467474	0.457958	0.646983	0.999731	Not DEG
NONMMUG040038.2	38.1376	27.248	49.0354	94.4458	44.2044	47.419	38.1403	62.0231	50.0817	-0.700864	0.634983	-1.10375	0.269701	0.999731	Not DEG
NONMMUG031228.2	10.4878	17.03	38.0275	14.1227	18.8104	27.0966	21.8484	20.0099	20.9292	0.128092	0.901514	0.142085	0.887013	0.999731	Not DEG
NONMMUG047693.1	0	0	1.00072	0	2.82156	0	0.333574	0.940519	0.637047	-1.35251	3.9937	-0.33866	0.734866	NA	Not DEG
NONMMUG014028.2	0	0	0	3.53069	0	0	0	1.1769	0.588448	-2.64457	3.97606	-0.665123	0.505972	NA	Not DEG
NONMMUG069982.1	0	0	0	0	0	19.3547	0	6.45156	3.22578	-5.09259	3.28401	-1.55072	0.120968	NA	Not DEG
NONMMUG078417.1	0	0	0	0	17.8699	4.83867	0	7.56951	3.78476	-5.32371	2.75101	-1.93518	0.0529678	NA	Not DEG
NONMMUG000522.2	20.0222	12.4887	21.0152	24.7148	5.64312	26.1288	17.842	18.8289	18.3355	-0.0761208	0.962426	-0.0790926	0.936959	0.999731	Not DEG
NONMMUG010019.2	33.3704	39.7367	28.0202	42.3682	59.2527	44.5158	33.7091	48.7122	41.2107	-0.532153	0.630075	-0.844586	0.398342	0.999731	Not DEG
NONMMUG038769.2	13.3481	14.7594	22.0159	4.41336	47.026	49.3545	16.7078	33.5979	25.1529	-1.00619	0.956698	-1.05173	0.292925	0.999731	Not DEG
NONMMUG036412.2	27.6497	15.8947	23.0166	20.3014	5.64312	14.516	22.187	13.4869	17.8369	0.71838	0.944749	0.760392	0.44702	0.999731	Not DEG
NONMMUG021903.2	0	0	0	0	0	5.80641	0	1.93547	0.967735	-3.35419	3.94929	-0.849316	0.395705	NA	Not DEG
NONMMUG042065.2	48.6254	48.8194	100.072	60.0217	94.9924	69.6769	65.839	74.897	70.368	-0.184992	0.564211	-0.327877	0.743005	0.999731	Not DEG
NONMMUG017305.2	622.596	589.239	575.416	653.177	582.181	523.544	595.75	586.301	591.025	0.022993	0.304126	0.0756037	0.939734	0.999731	Not DEG
NONMMUG007603.2	12.3947	29.5187	28.0202	19.4188	24.4535	46.4513	23.3112	30.1078	26.7095	-0.370397	0.811328	-0.456532	0.648008	0.999731	Not DEG
NONMMUG092908.1	61.9735	81.7441	32.0231	37.9549	58.3122	40.6448	58.5803	45.6373	52.1088	0.358978	0.624027	0.57526	0.565116	0.999731	Not DEG
NONMMUG039682.2	1927.85	168.03	1536.11	1479.36	1897.03	1612.25	1210.66	1662.88	1436.77	-0.457632	0.572536	-0.799306	0.424113	0.999731	Not DEG
NONMMUG076118.1	23.836	56.7668	56.0405	27.3628	29.1561	15.4838	45.5477	24.0009	34.7743	0.921806	0.727959	1.26629	0.20541	0.999731	Not DEG
NONMMUG000890.2	3.81376	0	0	0	0	8.70961	1.27125	2.9032	2.08723	-1.17938	3.44561	-0.342284	0.732137	NA	Not DEG
NONMMUG088683.1	0	0	7.00506	0	0	0	2.33502	0	1.16751	3.77304	3.94567	0.956248	0.338947	NA	Not DEG
NONMMUG043477.2	29.5566	48.8194	34.0246	21.1841	22.5725	2.9032	37.4669	15.5533	26.5101	1.26496	0.889856	1.42153	0.155161	0.999731	Not DEG
NONMMUG018932.2	1.90688	101.045	259.187	327.471	9.40519	222.579	120.713	186.485	153.599	-0.627562	1.69257	-0.370775	0.710805	0.999731	Not DEG
NONMMUG040939.2	0	0	0	2.64801	1.88104	0	0	1.50968	0.754842	-3.00055	3.96102	-0.757521	0.448738	NA	Not DEG
NONMMUG001644.2	11.4413	0	0	0	0	10.6451	3.81376	3.54836	3.68106	0.111486	2.86861	0.0388641	0.968999	NA	Not DEG
NONMMUG011439.2	2.86032	5.67668	47.034	24.7148	5.64312	19.3547	18.5237	16.5709	17.5473	0.161395	1.17956	0.136826	0.891168	0.999731	Not DEG
NONMMUG012466.2	139.202	112.398	107.077	195.953	134.494	112.257	119.559	147.568	133.564	-0.303802	0.44165	-0.687879	0.491529	0.999731	Not DEG
NONMMUG084866.2	25.7429	10.218	18.013	7.06137	31.9777	11.6128	17.9913	16.8839	17.4376	0.0955521	0.998982	0.0956495	0.923799	0.999731	Not DEG
NONMMUG021412.2	0	0	0	10.5921	0	15.4838	0	8.69194	4.34597	-5.52375	2.60746	-2.11844	0.0341378	NA	Down
NONMMUG055790.1	7.62751	11.3534	0	34.4242	15.0483	5.80641	6.32696	18.4263	12.3766	-1.54901	1.34644	-1.15045	0.24996	0.999731	Not DEG
NONMMUG073456.1	10.4878	28.3834	0	7.06137	18.8104	17.4192	12.9571	14.4303	13.6937	-0.159375	1.32372	-0.120399	0.904167	0.999731	Not DEG
NONMMUG086654.1	0.953439	0	0	0	0	0	0.317813	0	0.158907	1.10549	4.08047	0.270923	0.78645	NA	Not DEG
NONMMUG084361.1	0	0	3.00217	2.64801	0	0	1.00072	0.882671	0.941697	0.17781	3.91338	0.0454365	0.963759	NA	Not DEG
NONMMUG073535.1	0.953439	9.08268	0	3.53069	0	0	3.34537	1.1769	2.26113	1.4927	3.02876	0.492843	0.622124	NA	Not DEG
NONMMUG060783.1	0	3.40601	0	0	7.52415	0	1.13534	2.50805	1.82169	-1.15668	3.62459	-0.319121	0.749635	NA	Not DEG
NONMMUG010870.2	7.62751	20.436	19.0137	7.06137	3.76208	0	15.6924	3.60782	9.65012	2.1121	1.39984	1.50881	0.131348	0.999731	Not DEG
NONMMUG041390.2	0	0	4.00289	3.53069	4.7026	3.87094	1.3343	4.03474	2.68452	-1.58968	2.46752	-0.644241	0.519419	NA	Not DEG
NONMMUG010277.2	25.7429	54.4961	37.0267	36.1895	34.7992	13.5483	39.0886	28.179	33.6338	0.468702	0.746387	0.62796	0.53003	0.999731	Not DEG
NONMMUG017954.2	20.0222	23.842	30.0217	22.9495	47.9665	13.5483	24.6286	28.1547	26.3917	-0.193345	0.818236	-0.236294	0.813204	0.999731	Not DEG
NONMMUG046778.1	2.86032	0	0	0	0	15.4838	0.953439	5.16125	3.05734	-2.41886	3.04619	-0.79406	0.427161	NA	Not DEG
NONMMUG035711.2	0	1.13534	0	0.882671	0	0	0.378445	0.294224	0.336334	0.143722	4.08047	0.0352219	0.971903	NA	Not DEG
NONMMUG085595.1	2.86032	0	0	0	0	0	0.953439	0	0.47672	2.48945	4.0008	0.62224	0.533784	NA	Not DEG
NONMMUG020640.2	13.3481	14.7594	6.00434	41.4856	34.7992	21.2902	11.3706	32.525	21.9478	-1.51929	0.866588	-1.75318	0.0795707	0.999731	Not DEG
NONMMUG001472.2	0	0	0	0	0	3.87094	0	1.29031	0.645156	-2.76799	3.97043	-0.697153	0.485707	NA	Not DEG
NONMMUG034451.2	61.9735	28.3834	19.0137	44.1336	83.7062	89.0316	36.4569	72.2905	54.3737	-0.984447	0.664179	-1.4822	0.138287	0.999731	Not DEG
NONMMUG030140.2	58.1598	40.8721	36.026	42.3682	26.3345	56.1286	45.0193	41.6105	43.3149	0.114843	0.648334	0.177135	0.859402	0.999731	Not DEG
NONMMUG000188.2	5.72063	1.13534	0	0	0.940519	0	2.28532	0.313506	1.29941	2.78171	3.71002	0.749784	0.453385	NA	Not DEG
NONMMUG092886.1	22.8825	19.3007	33.0239	36.1895	31.9777	33.8707	25.069	34.0126	29.5408	-0.438976	0.721038	-0.608812	0.542649	0.999731	Not DEG
NONMMUG008116.2	1146.03	1455.5	1243.9	1103.34	1224.56	1192.25	1281.81	1173.38	1227.6	0.127392	0.287202	0.443561	0.65736	0.999731	Not DEG
NONMMUG088434.1	11.4413	0	22.0159	9.70939	0	0	11.1524	3.23646	7.19443	1.78015	2.06322	0.8628	0.388247	0.999731	Not DEG
NONMMUG019203.2	9.53439	4.54134	23.0166	37.9549	2.82156	40.6448	12.3641	27.1404	19.7523	-1.13131	1.10307	-1.0256	0.305078	0.999731	Not DEG
NONMMUG088597.1	4.7672	0	21.0152	7.06137	2.82156	17.4192	8.59412	9.10072	8.84742	-0.0778828	1.55466	-0.0500963	0.960046	0.999731	Not DEG
NONMMUG092614.1	23.836	2.27067	4.00289	0	1.88104	0	10.0365	0.627013	5.33176	4.0103	2.09411	1.91504	0.0554872	0.999731	Not DEG
NONMMUG072961.1	0	0	0	0	0	30.9675	0	10.3225	5.16125	-5.77083	2.8542	-2.02187	0.0431894	0.918937	Down
NONMMUG045952.2	0	3.40601	0	2.64801	13.1673	0	1.13534	5.27176	3.20355	-2.23992	2.66705	-0.839852	0.400991	NA	Not DEG
NONMMUG012019.2	119.18	63.5788	60.0434	45.8989	13.1673	95.8057	80.934	51.624	66.279	0.650311	0.708665	0.917656	0.358799	0.999731	Not DEG
NONMMUG000936.2	0	0	0	0	0	7.74188	0	2.58063	1.29031	-3.76987	3.93869	-0.957138	0.338498	NA	Not DEG
NONMMUG019900.2	32.4169	40.8721	17.0123	44.1336	29.1561	51.2899	30.1004	41.5265	35.8135	-0.466092	0.706472	-0.659746	0.509417	0.999731	Not DEG
NONMMUG065953.1	6.67407	20.436	7.00506	13.2401	9.40519	4.83867	11.3717	9.16131	10.2665	0.304622	1.19476	0.254966	0.79875	0.999731	Not DEG
NONMMUG034617.3	0	4.54134	2.00145	0	12.2267	15.4838	2.18093	9.23683	5.70888	-2.09519	1.98034	-1.058	0.290057	0.999731	Not DEG
NONMMUG045831.2	11.4413	4.54134	12.0087	20.3014	2.82156	4.83867	9.33043	9.32056	9.32549	0.0014153	1.30655	0.00108323	0.999136	0.999731	Not DEG
NONMMUG048161.1	2.86032	0	0	0	0	0	0.953439	0	0.47672	2.48945	4.0008	0.62224	0.533784	NA	Not DEG
NONMMUG065205.1	0	10.218	0	0	0	7.74188	3.40601	2.58063	2.99332	0.396782	3.06171	0.129595	0.896887	NA	Not DEG
NONMMUG008366.2	6.67407	0	4.00289	0.882671	0	0	3.55899	0.294224	1.92661	3.42129	3.17684	1.07695	0.281505	NA	Not DEG
NONMMUG089248.1	9.53439	5.67668	24.0173	16.7708	9.40519	7.74188	13.0761	11.3059	12.191	0.210688	1.12315	0.187587	0.8512	0.999731	Not DEG
NONMMUG001511.2	0	0	0	0	0	3.87094	0	1.29031	0.645156	-2.76799	3.97043	-0.697153	0.485707	NA	Not DEG
NONMMUG072814.1	1.90688	5.67668	0	0	0.940519	0	2.52785	0.313506	1.42068	2.91996	3.56741	0.818511	0.413065	NA	Not DEG
NONMMUG006364.2	190.688	187.33	161.116	212.724	160.829	131.612	179.712	168.388	174.05	0.0933093	0.402105	0.232052	0.816497	0.999731	Not DEG
NONMMUG025112.2	0	0	0	0.882671	0	0	0	0.294224	0.147112	-0.818059	4.08047	-0.200481	0.841104	NA	Not DEG
NONMMUG021540.2	194.502	214.578	281.203	147.406	222.903	222.579	230.094	197.629	213.862	0.219856	0.393844	0.558231	0.576687	0.999731	Not DEG
NONMMUG031082.2	26.6963	0	4.00289	15.0054	14.1078	21.2902	10.2331	16.8011	13.5171	-0.707456	1.33137	-0.531374	0.59516	0.999731	Not DEG
NONMMUG042205.2	61.0201	59.0374	7.00506	82.9711	18.8104	10.6451	42.3542	37.4755	39.9149	0.174178	0.939008	0.185492	0.852844	0.999731	Not DEG
NONMMUG012042.2	25.7429	19.3007	13.0094	49.4296	32.9182	38.7094	19.351	40.3524	29.8517	-1.05971	0.737776	-1.43635	0.150902	0.999731	Not DEG
NONMMUG065714.1	0	1.13534	0	7.06137	0	0	0.378445	2.35379	1.36612	-2.68018	3.94163	-0.679967	0.496525	NA	Not DEG
NONMMUG050060.1	0	0	7.00506	17.6534	2.82156	0	2.33502	6.825	4.58001	-1.54536	2.38847	-0.64701	0.517626	NA	Not DEG
NONMMUG005240.2	2.86032	4.54134	10.0072	4.41336	8.46467	0	5.80296	4.29268	5.04782	0.433716	1.79189	0.242044	0.808746	NA	Not DEG
NONMMUG065186.2	105.832	86.2855	49.0354	54.7256	35.7397	47.419	80.3842	45.9614	63.1728	0.806179	0.573336	1.40612	0.159689	0.999731	Not DEG
NONMMUG024381.2	0	0	0	0.882671	0	0.967735	0	0.616802	0.308401	-1.70775	4.03837	-0.42288	0.672382	NA	Not DEG
NONMMUG000867.2	0	21.5714	0	0	1.88104	80.322	7.19046	27.401	17.2957	-1.93191	3.74144	-0.516355	NA	NA	Not DEG
NONMMUG004661.2	0	0	0	3.53069	0	0	0	1.1769	0.588448	-2.64457	3.97606	-0.665123	0.505972	NA	Not DEG
NONMMUG034479.2	352987	546728	0	406525	50761.7	452978	299905	303422	301663	-0.0167553	2.73072	-0.00613586	0.995104	0.999731	Not DEG
NONMMUG029468.2	294.613	259.992	297.215	241.852	282.156	324.191	283.94	282.733	283.336	0.00664236	0.347299	0.0191258	0.984741	0.999731	Not DEG
NONMMUG034304.2	49.5788	38.6014	73.0528	29.1282	126.03	113.225	53.7443	89.4609	71.6026	-0.733299	0.644885	-1.1371	0.255497	0.999731	Not DEG
NONMMUG092488.1	68.6476	44.2781	65.047	57.3736	33.8587	55.1609	59.3242	48.7977	54.061	0.282904	0.586089	0.482698	0.62931	0.999731	Not DEG
NONMMUG070742.1	12.3947	9.08268	0	23.8321	25.394	3.87094	7.15913	17.699	12.4291	-1.30672	1.36017	-0.960706	0.3367	0.999731	Not DEG
NONMMUG034285.2	32.4169	31.7894	54.039	45.0162	40.4423	52.2577	39.4151	45.9054	42.6603	-0.219004	0.631711	-0.346685	0.728828	0.999731	Not DEG
NONMMUG014905.2	159.224	139.646	80.0578	69.731	112.862	309.675	126.309	164.089	145.199	-0.376841	0.576475	-0.653698	0.513306	0.999731	Not DEG
NONMMUG040785.2	490.068	386.014	390.282	476.643	332.003	343.546	422.121	384.064	403.093	0.13632	0.342916	0.397532	0.690975	0.999731	Not DEG
NONMMUG056084.1	0	0	0	0	15.0483	0	0	5.0161	2.50805	-4.73037	3.57153	-1.32447	0.185347	NA	Not DEG
NONMMUG009186.2	2.86032	5.67668	6.00434	2.64801	14.1078	5.80641	4.84711	7.52074	6.18392	-0.635037	1.47937	-0.42926	0.667734	0.999731	Not DEG
NONMMUG059683.1	11.4413	0	0	0	0	0	3.81376	0	1.90688	4.48191	3.92861	1.14084	0.253937	NA	Not DEG
NONMMUG060146.1	4.7672	14.7594	2.00145	2.64801	5.64312	2.9032	7.176	3.73144	5.45372	0.938167	1.5858	0.591605	0.554115	0.999731	Not DEG
NONMMUG025261.2	5.72063	0	8.00578	0	0	14.516	4.57547	4.83867	4.70707	-0.0741198	2.36474	-0.0313437	0.974995	NA	Not DEG
NONMMUG025905.2	174.479	203.225	183.132	292.164	153.305	65.8059	186.946	170.425	178.685	0.132451	0.52116	0.254147	0.799382	0.999731	Not DEG
NONMMUG075776.1	7.62751	0	0	0	8.46467	0	2.5425	2.82156	2.68203	-0.143554	3.16259	-0.0453914	0.963795	NA	Not DEG
NONMMUG025562.2	47.672	115.804	137.099	110.334	107.219	74.5156	100.192	97.3562	98.774	0.0400241	0.536553	0.0745949	0.940537	0.999731	Not DEG
NONMMUG001591.2	4.7672	7.94735	4.00289	2.64801	8.46467	0	5.57248	3.70423	4.63835	0.586289	1.83718	0.319125	0.749632	NA	Not DEG
NONMMUG070719.1	0	4.54134	2.00145	9.70939	4.7026	7.74188	2.18093	7.38462	4.78277	-1.77719	1.80239	-0.986019	0.324124	NA	Not DEG
NONMMUG074775.1	0	0	7.00506	0	0	0	2.33502	0	1.16751	3.77304	3.94567	0.956248	0.338947	NA	Not DEG
NONMMUG028437.2	0	0	0	0	0	6.77414	0	2.25805	1.12902	-3.57695	3.94323	-0.907111	0.364348	NA	Not DEG
NONMMUG020482.2	0	0	8.00578	0	0	0	2.66859	0	1.3343	3.96548	3.94083	1.00625	0.314294	NA	Not DEG
NONMMUG006039.2	36.2307	17.03	14.0101	11.4747	15.9888	29.032	22.4236	18.8319	20.6277	0.255735	0.900386	0.284028	0.776389	0.999731	Not DEG
NONMMUG032923.2	0	9.08268	0	0	0	0	3.02756	0	1.51378	4.14117	3.93694	1.05187	0.292857	NA	Not DEG
NONMMUG011544.2	5.72063	4.54134	0	0	0	0	3.42066	0	1.71033	4.32198	3.61328	1.19614	0.231643	NA	Not DEG
NONMMUG044507.2	0	0	0	7.06137	0	0	0	2.35379	1.1769	-3.64196	3.94163	-0.923973	0.3555	NA	Not DEG
NONMMUG034105.2	11.4413	9.08268	341.246	356.599	342.349	38.7094	120.59	245.886	183.238	-1.02774	1.59626	-0.643844	NA	NA	Not DEG
NONMMUG026044.2	65.7873	18.1654	42.0304	53.843	49.8475	29.9998	41.9943	44.5634	43.2789	-0.0830002	0.700634	-0.118465	0.9057	0.999731	Not DEG
NONMMUG043011.2	0	0	15.0108	0	15.0483	0	5.00361	5.0161	5.00986	-0.00133697	2.63453	-0.000507479	0.999595	NA	Not DEG
NONMMUG068088.1	15.255	0	45.0325	22.0668	6.58363	22.2579	20.0959	16.9694	18.5326	0.246341	1.25025	0.197033	0.843802	0.999731	Not DEG
NONMMUG010856.2	115.366	118.075	59.0426	107.686	101.576	107.419	97.4946	105.56	101.527	-0.115256	0.485117	-0.237584	0.812204	0.999731	Not DEG
NONMMUG089335.1	17.1619	0	29.021	15.8881	15.0483	19.3547	15.3943	16.7637	16.079	-0.118723	1.2198	-0.0973294	0.922465	0.999731	Not DEG
NONMMUG069698.1	0	0	0	0	32.9182	0	0	10.9727	5.48636	-5.85974	2.80586	-2.08839	0.0367624	0.894066	Down
NONMMUG061972.1	11.4413	0	0	0	0	0	3.81376	0	1.90688	4.48191	3.92861	1.14084	0.253937	NA	Not DEG
NONMMUG054406.1	1.90688	0	0	0	0	0	0.635626	0	0.317813	1.90889	4.04654	0.471733	0.637118	NA	Not DEG
NONMMUG000267.2	23100.9	20329.3	20283.7	21962.6	20960.4	21267.9	21237.9	21397	21317.5	-0.0107586	0.261383	-0.0411605	0.967168	0.999731	Not DEG
NONMMUG043889.2	9.53439	0	0	0.882671	4.7026	0	3.17813	1.86176	2.51994	0.77734	2.92114	0.266109	0.790156	NA	Not DEG
NONMMUG087847.1	0	0	4.00289	0	0	0	1.3343	0	0.667149	2.96686	3.97454	0.746468	0.455385	NA	Not DEG
NONMMUG091018.1	6.67407	4.54134	7.00506	21.1841	15.0483	1.93547	6.07349	12.7226	9.39806	-1.06639	1.3044	-0.817529	0.413626	0.999731	Not DEG
NONMMUG025420.2	41.9513	54.4961	98.0708	22.0668	77.1226	22.2579	64.8394	40.4824	52.6609	0.68013	0.711028	0.956544	0.338798	0.999731	Not DEG
NONMMUG061657.1	3.81376	0	0	0	0	0.967735	1.27125	0.322578	0.796915	1.94034	3.97762	0.487814	0.625681	NA	Not DEG
NONMMUG009042.2	25.7429	32.9247	25.0181	51.1949	38.5613	22.2579	27.8952	37.338	32.6166	-0.423049	0.716651	-0.590314	0.55498	0.999731	Not DEG
NONMMUG044280.2	4.7672	12.4887	5.00361	3.53069	3.76208	8.70961	7.41983	5.33412	6.37698	0.473531	1.43395	0.330227	0.741228	0.999731	Not DEG
NONMMUG030867.2	3694.58	4390.34	4268.08	3539.51	3445.12	3991.9	4117.67	3658.85	3888.26	0.170419	0.272302	0.625847	0.531415	0.999731	Not DEG
NONMMUG091435.1	32.4169	26.1127	45.0325	74.1444	43.2639	17.4192	34.5207	44.9425	39.7316	-0.381074	0.73509	-0.518404	0.604176	0.999731	Not DEG
NONMMUG046914.1	0	0	4.00289	10.5921	6.58363	3.87094	1.3343	7.01554	4.17492	-2.38691	2.10744	-1.13261	0.257378	NA	Not DEG
NONMMUG068010.1	0	0	7.00506	0	0	3.87094	2.33502	1.29031	1.81267	0.862001	3.62056	0.238085	0.811815	NA	Not DEG
NONMMUG020500.2	40.0444	11.3534	18.013	14.1227	17.8699	35.8062	23.1369	22.5996	22.8683	0.0390196	0.891375	0.0437746	0.965084	0.999731	Not DEG
NONMMUG086451.1	0	19.3007	0	17.6534	21.6319	13.5483	6.43357	17.6112	12.0224	-1.46611	1.5599	-0.93987	0.347284	0.999731	Not DEG
NONMMUG051978.1	0	0	0	0	0	2.9032	0	0.967735	0.483867	-2.35177	3.99149	-0.589196	0.55573	NA	Not DEG
NONMMUG054381.1	3.81376	21.5714	0	0	4.7026	0	8.46171	1.56753	5.01462	2.4311	2.3145	1.05038	0.293545	NA	Not DEG
NONMMUG043273.2	30.5101	38.6014	20.0145	22.0668	2.82156	21.2902	29.7086	15.3928	22.5507	0.946917	0.943396	1.00373	0.315508	0.999731	Not DEG
NONMMUG022108.2	270.777	355.36	207.15	73.2617	165.531	123.87	277.762	120.888	199.325	1.20035	0.445204	2.69619	0.00701382	0.482407	Up
NONMMUG065709.1	12.3947	17.03	4.00289	7.06137	5.64312	54.1931	11.1425	22.2992	16.7209	-1.00196	1.1595	-0.864126	0.387518	0.999731	Not DEG
NONMMUG062031.1	0	0	0	0	0	7.74188	0	2.58063	1.29031	-3.76987	3.93869	-0.957138	0.338498	NA	Not DEG
NONMMUG061337.1	0	0	0	7.06137	0	0	0	2.35379	1.1769	-3.64196	3.94163	-0.923973	0.3555	NA	Not DEG
NONMMUG039126.3	147.783	154.406	164.119	171.238	195.628	221.611	155.436	196.159	175.797	-0.335493	0.382423	-0.877281	0.380334	0.999731	Not DEG
NONMMUG033369.2	185.921	7.94735	14.0101	5.29603	9.40519	12.5805	69.2927	9.09392	39.1933	2.93385	1.03777	2.82706	NA	NA	Not DEG
NONMMUG048545.2	20.9757	30.6541	21.0152	20.3014	31.9777	45.4835	24.215	32.5875	28.4013	-0.429218	0.757629	-0.566528	0.571035	0.999731	Not DEG
NONMMUG008538.2	0	0	16.0116	0	3.76208	2.9032	5.33719	2.22176	3.77947	1.2691	2.54472	0.498719	0.617978	NA	Not DEG
NONMMUG030769.2	42.9048	56.7668	21.0152	14.1227	32.9182	10.6451	40.2289	19.2287	29.7288	1.06381	0.812456	1.30937	0.190408	0.999731	Not DEG
NONMMUG010713.2	0	0	0	0	1.88104	0	0	0.627013	0.313506	-1.7287	4.03651	-0.428266	0.668458	NA	Not DEG
NONMMUG004209.2	14.3016	7.94735	27.0195	1.76534	3.76208	9.67735	16.4228	5.06825	10.7455	1.70307	1.2334	1.38079	0.167344	0.999731	Not DEG
NONMMUG012781.2	100.111	77.2028	95.0687	182.713	85.5872	169.354	90.7942	145.885	118.339	-0.683575	0.478766	-1.42779	0.153353	0.999731	Not DEG
NONMMUG030936.2	0	15.8947	7.00506	1.76534	0	2.9032	7.63325	1.55618	4.59472	2.29161	2.11901	1.08145	0.279497	NA	Not DEG
NONMMUG008731.3	3.81376	0	0	0	0	0	1.27125	0	0.635626	2.90211	3.97762	0.729611	0.465628	NA	Not DEG
NONMMUG003280.2	26.6963	9.08268	22.0159	19.4188	10.3457	12.5805	19.265	14.115	16.69	0.450862	0.960041	0.469628	0.638621	0.999731	Not DEG
NONMMUG059603.1	0	0	0	0	2.82156	0	0	0.940519	0.47026	-2.31429	3.9937	-0.579485	0.562262	NA	Not DEG
NONMMUG076391.1	0	0	0	0	3.76208	0	0	1.25403	0.627013	-2.72965	3.97213	-0.687202	0.491955	NA	Not DEG
NONMMUG019558.2	83.9026	31.7894	98.0708	48.5469	61.1337	90.967	71.2543	66.8826	69.0684	0.0941483	0.605983	0.155365	0.876534	0.999731	Not DEG
NONMMUG092729.1	20.9757	24.9774	28.0202	0	0	10.6451	24.6578	3.54836	14.1031	2.80651	1.41971	1.97682	0.0480621	0.958279	Up
NONMMUG055855.1	0	0	4.00289	0	0	0	1.3343	0	0.667149	2.96686	3.97454	0.746468	0.455385	NA	Not DEG
NONMMUG092677.1	0	0	0	7.06137	0	2.9032	0	3.32152	1.66076	-4.13714	3.66403	-1.12912	0.258845	NA	Not DEG
NONMMUG020096.2	24.7894	27.248	43.0311	28.2455	22.5725	18.387	31.6895	23.0683	27.3789	0.457476	0.754493	0.606336	0.544292	0.999731	Not DEG
NONMMUG040539.2	600.667	557.45	413.299	407.794	52.6691	33.8707	523.805	164.778	344.291	1.66755	0.673371	2.47643	0.0132705	0.613819	Up
NONMMUG027324.2	9.53439	11.3534	8.00578	11.4747	22.5725	16.4515	9.63118	16.8329	13.232	-0.806355	1.02239	-0.788697	0.430289	0.999731	Not DEG
NONMMUG089428.1	5.72063	4.54134	0	0	0	0	3.42066	0	1.71033	4.32198	3.61328	1.19614	0.231643	NA	Not DEG
NONMMUG079758.1	0	0	0	0	0	6.77414	0	2.25805	1.12902	-3.57695	3.94323	-0.907111	0.364348	NA	Not DEG
NONMMUG048717.1	3.81376	0	0	0	0	0	1.27125	0	0.635626	2.90211	3.97762	0.729611	0.465628	NA	Not DEG
NONMMUG023011.2	2.86032	13.624	2.00145	2.64801	12.2267	1.93547	6.16193	5.60341	5.88267	0.129799	1.61226	0.0805076	0.935834	0.999731	Not DEG
NONMMUG003616.2	887.652	831.065	857.619	909.152	762.761	861.284	858.779	844.399	851.589	0.0243808	0.289935	0.0840905	0.932985	0.999731	Not DEG
NONMMUG060078.1	9.53439	30.6541	24.0173	45.0162	23.513	43.5481	21.4019	37.3591	29.3805	-0.808052	0.79005	-1.02279	0.306409	0.999731	Not DEG
NONMMUG035834.2	596.853	560.856	566.409	502.24	563.371	21.2902	574.706	362.3	468.503	0.665572	1.08809	0.611689	0.540743	0.999731	Not DEG
NONMMUG026148.2	0	0	4.00289	0	10.3457	0	1.3343	3.44857	2.39143	-1.3655	3.29037	-0.414998	0.678144	NA	Not DEG
NONMMUG068242.1	2.86032	0	0	0	0	0	0.953439	0	0.47672	2.48945	4.0008	0.62224	0.533784	NA	Not DEG
NONMMUG039987.2	0	0	3.00217	0	2.82156	19.3547	1.00072	7.39208	4.1964	-2.87492	2.46524	-1.16618	0.243542	NA	Not DEG
NONMMUG040990.2	21.9291	11.3534	6.00434	24.7148	35.7397	21.2902	13.0956	27.2482	20.1719	-1.05413	0.908933	-1.15974	0.246154	0.999731	Not DEG
NONMMUG050907.1	0	2.27067	0	0	0	0	0.75689	0	0.378445	2.12818	4.02714	0.528459	0.597181	NA	Not DEG
NONMMUG060283.1	0	12.4887	0	0	0	0	4.1629	0	2.08145	4.60165	3.81174	1.20723	0.227343	NA	Not DEG
NONMMUG022868.2	11.4413	9.08268	0	0	3.76208	17.4192	6.84132	7.06043	6.95087	-0.0431732	1.87968	-0.0229684	0.981676	0.999731	Not DEG
NONMMUG078883.1	0	0	0	0	11.2862	0	0	3.76208	1.88104	-4.3153	3.92866	-1.09841	0.272023	NA	Not DEG
NONMMUG060302.1	0	21.5714	8.00578	0	0	0	9.85905	0	4.92953	5.8466	2.52324	2.31709	0.0204986	NA	Up
NONMMUG043109.2	2.86032	6.81201	6.00434	0	0	14.516	5.22556	4.83867	5.03211	0.112749	2.07066	0.0544506	0.956576	NA	Not DEG
NONMMUG009592.2	99.1577	66.9848	36.026	49.4296	39.5018	41.6126	67.3895	43.5147	55.4521	0.631276	0.611792	1.03185	0.302143	0.999731	Not DEG
NONMMUG043526.2	49.5788	60.1728	65.047	61.787	52.6691	118.064	58.2662	77.5066	67.8864	-0.411356	0.56478	-0.728347	0.466401	0.999731	Not DEG
NONMMUG018729.2	0	0	20.0145	7.94404	0	2.9032	6.67149	3.61575	5.14362	0.882829	2.33088	0.378753	0.704871	0.999731	Not DEG
NONMMUG084698.1	3.81376	0	0	0	0	0	1.27125	0	0.635626	2.90211	3.97762	0.729611	0.465628	NA	Not DEG
NONMMUG033341.2	46.7185	80.6088	74.0535	75.9097	58.3122	100.644	67.1269	78.2888	72.7079	-0.223041	0.537983	-0.414589	0.678443	0.999731	Not DEG
NONMMUG047239.1	9.53439	0	2.00145	0	0	0	3.84528	0	1.92264	4.49423	3.48052	1.29125	0.196616	NA	Not DEG
NONMMUG016257.2	21.9291	53.3608	22.0159	84.7365	55.4906	58.0641	32.4353	66.0971	49.2662	-1.03234	0.650165	-1.58781	0.11233	0.999731	Not DEG
NONMMUG070624.1	0	4.54134	0	0	0	21.2902	1.51378	7.09672	4.30525	-2.24532	2.74541	-0.817847	0.413445	NA	Not DEG
NONMMUG065978.1	23.836	14.7594	22.0159	24.7148	25.394	53.2254	20.2037	34.4447	27.3242	-0.766303	0.781752	-0.980238	0.326969	0.999731	Not DEG
NONMMUG064180.1	0	6.81201	7.00506	4.41336	7.52415	3.87094	4.60569	5.26948	4.93759	-0.199227	1.78112	-0.111855	0.910938	NA	Not DEG
NONMMUG059627.1	0	0	0	0	0	7.74188	0	2.58063	1.29031	-3.76987	3.93869	-0.957138	0.338498	NA	Not DEG
NONMMUG030803.2	205.943	239.556	252.182	157.998	215.379	172.257	232.56	181.878	207.219	0.354601	0.37496	0.945704	0.3443	0.999731	Not DEG
NONMMUG018380.2	15.255	9.08268	8.00578	10.5921	14.1078	29.9998	10.7812	18.2332	14.5072	-0.754197	1.02259	-0.737538	0.460795	0.999731	Not DEG
NONMMUG081075.1	0	4.54134	0	0	0	0	1.51378	0	0.75689	3.13659	3.96707	0.790655	0.429145	NA	Not DEG
NONMMUG052124.1	0.953439	3.40601	0	3.53069	2.82156	0	1.45315	2.11741	1.78528	-0.555944	2.92903	-0.189805	0.849462	NA	Not DEG
NONMMUG061431.1	26.6963	6.81201	34.0246	2.64801	7.52415	17.4192	22.511	9.19713	15.854	1.29774	1.10334	1.17619	0.239519	0.999731	Not DEG
NONMMUG033664.2	34.3238	26.1127	11.008	32.6588	13.1673	83.2252	23.8148	43.0171	33.416	-0.851892	0.855974	-0.995231	0.319624	0.999731	Not DEG
NONMMUG090870.1	0	0	4.00289	0	3.76208	0	1.3343	1.25403	1.29416	0.0934959	3.86322	0.0242015	0.980692	NA	Not DEG
NONMMUG015950.2	104.878	30.6541	122.088	89.1498	142.959	67.7414	85.8735	99.95	92.9118	-0.216975	0.601336	-0.360821	0.718234	0.999731	Not DEG
NONMMUG079152.1	0	0	0	0	2.82156	0	0	0.940519	0.47026	-2.31429	3.9937	-0.579485	0.562262	NA	Not DEG
NONMMUG093810.1	12.3947	19.3007	9.00651	16.7708	25.394	2.9032	13.5673	15.0227	14.295	-0.150483	1.10473	-0.136218	0.891649	0.999731	Not DEG
NONMMUG076376.1	0	0	0	0	0	10.6451	0	3.54836	1.77418	-4.22983	3.93	-1.07629	0.281796	NA	Not DEG
NONMMUG020852.2	3.81376	17.03	0	6.1787	17.8699	2.9032	6.94793	8.98392	7.96593	-0.37874	1.60852	-0.235458	0.813853	0.999731	Not DEG
NONMMUG061147.1	0	0	0	0	8.46467	7.74188	0	5.40218	2.70109	-4.83666	3.05429	-1.58356	0.113294	NA	Not DEG
NONMMUG039660.2	0	0	0	0	0	3.87094	0	1.29031	0.645156	-2.76799	3.97043	-0.697153	0.485707	NA	Not DEG
NONMMUG018350.2	0	0	8.00578	0	0	0	2.66859	0	1.3343	3.96548	3.94083	1.00625	0.314294	NA	Not DEG
NONMMUG095305.1	6.67407	0	0	0	0	0	2.22469	0	1.11235	3.70621	3.9475	0.938875	0.347795	NA	Not DEG
NONMMUG039067.2	69.6011	127.158	124.09	58.2563	75.2415	139.354	106.949	90.9505	98.95	0.233763	0.533988	0.437768	0.661555	0.999731	Not DEG
NONMMUG009797.2	607.341	653.953	517.374	687.601	521.048	649.35	592.889	619.333	606.111	-0.0631511	0.314715	-0.200661	0.840964	0.999731	Not DEG
NONMMUG046027.2	9.53439	0	0	0	0	0	3.17813	0	1.58907	4.21941	3.93535	1.07218	0.283639	NA	Not DEG
NONMMUG019827.2	55.2995	69.2555	95.0687	110.334	63.9553	88.0638	73.2079	87.451	80.3294	-0.257048	0.520767	-0.493596	0.621592	0.999731	Not DEG
NONMMUG094585.1	3.81376	0	0	0	0	0	1.27125	0	0.635626	2.90211	3.97762	0.729611	0.465628	NA	Not DEG
NONMMUG055623.1	6.67407	11.3534	4.00289	36.1895	21.6319	6.77414	7.34344	21.5319	14.4377	-1.55908	1.09543	-1.42326	0.154662	0.999731	Not DEG
NONMMUG035391.2	0	0	9.00651	1.76534	20.6914	10.6451	3.00217	11.0339	7.01806	-1.8718	1.86175	-1.0054	0.314706	0.999731	Not DEG
NONMMUG019105.3	0	0	0	0	31.9777	3.87094	0	11.9495	5.97476	-5.9826	2.44093	-2.45095	0.0142479	0.623149	Down
NONMMUG027881.2	2.86032	0	0	3.53069	15.0483	23.2256	0.953439	13.9349	7.44416	-3.82851	1.78596	-2.14367	0.0320592	0.85521	Down
NONMMUG010415.2	34.3238	106.722	59.0426	75.0271	53.6096	89.9993	66.696	72.8787	69.7873	-0.13068	0.596341	-0.219136	0.826544	0.999731	Not DEG
NONMMUG088847.1	5.72063	0	4.00289	1.76534	0	3.87094	3.24118	1.87876	2.55997	0.793986	2.54037	0.312548	0.754624	NA	Not DEG
NONMMUG043854.2	0	0	1.00072	0	0	0	0.333574	0	0.166787	1.10549	4.08047	0.270923	0.78645	NA	Not DEG
NONMMUG018233.2	3.81376	44.2781	8.00578	2.64801	188.104	5.80641	18.6992	65.5194	42.1093	-1.81395	1.22111	-1.48549	NA	NA	Not DEG
NONMMUG024894.2	1.90688	10.218	0	5.29603	9.40519	8.70961	4.04163	7.80361	5.92262	-0.961353	1.70144	-0.565022	0.572059	0.999731	Not DEG
NONMMUG090307.1	61.9735	79.4735	78.0564	59.139	92.1709	86.1284	73.1678	79.1461	76.1569	-0.113409	0.507823	-0.223324	0.823283	0.999731	Not DEG
NONMMUG022866.2	14.3016	7.94735	2.00145	10.5921	1.88104	1.93547	8.08346	4.80285	6.44316	0.747563	1.54712	0.483196	0.628957	0.999731	Not DEG
NONMMUG008626.2	7.62751	0	0	0	0	0	2.5425	0	1.27125	3.89829	3.94245	0.988799	0.322761	NA	Not DEG
NONMMUG052144.1	4.7672	19.3007	3.00217	5.29603	5.64312	0.967735	9.02335	3.96896	6.49616	1.17644	1.53574	0.766045	0.44365	0.999731	Not DEG
NONMMUG014108.2	79.1354	78.3381	98.0708	45.8989	79.9441	56.1286	85.1815	60.6572	72.9193	0.49056	0.521935	0.939886	0.347276	0.999731	Not DEG
NONMMUG082412.1	0.953439	1.13534	6.00434	1.76534	4.7026	7.74188	2.6977	4.7366	3.71715	-0.806796	1.88115	-0.428885	0.668007	NA	Not DEG
NONMMUG063571.1	4.7672	20.436	0	6.1787	2.82156	7.74188	8.40108	5.58071	6.99089	0.58402	1.6522	0.35348	0.723728	0.999731	Not DEG
NONMMUG049473.1	0	0	3.00217	7.94404	0	10.6451	1.00072	6.19637	3.59855	-2.62234	2.53053	-1.03628	0.30007	NA	Not DEG
NONMMUG044728.2	3.81376	0	4.00289	0	0	0	2.60555	0	1.30277	3.93225	3.94162	0.997621	0.318463	NA	Not DEG
NONMMUG074365.1	7.62751	0	0	0	0	3.87094	2.5425	1.29031	1.91641	0.987919	3.54645	0.278565	0.780578	NA	Not DEG
NONMMUG012653.2	0	21.5714	0	21.1841	0	16.4515	7.19046	12.5452	9.86783	-0.811063	1.95251	-0.415395	0.677853	0.999731	Not DEG
NONMMUG088020.1	0	0	0	0	0	5.80641	0	1.93547	0.967735	-3.35419	3.94929	-0.849316	0.395705	NA	Not DEG
NONMMUG072513.1	28.6032	69.2555	33.0239	19.4188	15.9888	39.6771	43.6275	25.0282	34.3279	0.800414	0.756183	1.05849	0.289831	0.999731	Not DEG
NONMMUG095632.1	44.8116	24.9774	31.0224	45.8989	25.394	66.7737	33.6038	46.0222	39.813	-0.451268	0.691041	-0.653026	0.513739	0.999731	Not DEG
NONMMUG028669.2	0.953439	1.13534	7.00506	0.882671	1.88104	2.9032	3.03128	1.88897	2.46012	0.687891	2.21027	0.311225	0.755629	NA	Not DEG
NONMMUG095791.1	482.44	389.42	330.239	367.191	464.616	512.899	400.7	448.236	424.468	-0.161363	0.342898	-0.470586	0.637936	0.999731	Not DEG
NONMMUG047652.1	0.953439	0	0	2.64801	0	0.967735	0.317813	1.20525	0.761531	-1.71451	3.97457	-0.431369	0.6662	NA	Not DEG
NONMMUG093348.1	82.9492	20.436	55.0398	64.435	77.1226	21.2902	52.8083	54.2826	53.5455	-0.0377381	0.722768	-0.0522133	0.958359	0.999731	Not DEG
NONMMUG024523.2	0	0	0	4.41336	0	0	0	1.47112	0.73556	-2.96548	3.96234	-0.748416	0.454209	NA	Not DEG
NONMMUG063207.1	3.81376	0	0	0	0	3.87094	1.27125	1.29031	1.28078	-0.00959536	3.86464	-0.00248286	0.998019	NA	Not DEG
NONMMUG071082.1	0	0	0	0	0	1.93547	0	0.645156	0.322578	-1.76457	4.03337	-0.437493	0.661754	NA	Not DEG
NONMMUG073643.1	155.411	208.902	226.163	189.774	204.093	210.966	196.825	201.611	199.218	-0.0349794	0.379662	-0.0921329	0.926592	0.999731	Not DEG
NONMMUG025734.2	115.366	40.8721	50.0361	88.2671	118.505	151.934	68.7581	119.569	94.1635	-0.795171	0.557183	-1.42713	0.153543	0.999731	Not DEG
NONMMUG076852.1	0.953439	10.218	4.00289	5.29603	0.940519	2.9032	5.05812	3.04658	4.05235	0.721518	1.83283	0.393664	0.693829	NA	Not DEG
NONMMUG003717.2	65.7873	43.1427	33.0239	19.4188	49.8475	41.6126	47.318	36.9596	42.1388	0.358552	0.683487	0.524592	0.599867	0.999731	Not DEG
NONMMUG032839.2	0	3.40601	0	0	0	2.9032	1.13534	0.967735	1.05153	0.223153	3.89601	0.0572773	0.954324	NA	Not DEG
NONMMUG014394.2	0	0	0	1.76534	0	0	0	0.588448	0.294224	-1.64922	4.04373	-0.407847	0.683386	NA	Not DEG
NONMMUG000802.2	15.255	5.67668	3.00217	11.4747	31.0371	2.9032	7.97796	15.1384	11.5582	-0.920212	1.26965	-0.724773	0.468591	0.999731	Not DEG
NONMMUG030461.2	33.3704	9.08268	3.00217	20.3014	0	36.7739	15.1517	19.0251	17.0884	-0.325361	1.35273	-0.240521	0.809926	0.999731	Not DEG
NONMMUG094118.1	0	0	0	0	0	27.0966	0	9.03219	4.51609	-5.57814	2.96351	-1.88227	0.059799	NA	Not DEG
NONMMUG036722.2	0	0	0	0	0	7.74188	0	2.58063	1.29031	-3.76987	3.93869	-0.957138	0.338498	NA	Not DEG
NONMMUG090232.1	7.62751	0	18.013	2.64801	30.0966	0	8.54684	10.9149	9.73086	-0.349324	1.77135	-0.197207	0.843665	0.999731	Not DEG
NONMMUG062159.1	0	11.3534	9.00651	0	3.76208	4.83867	6.78662	2.86692	4.82677	1.24401	2.05475	0.605428	0.544894	NA	Not DEG
NONMMUG016083.2	36.2307	3.40601	10.0072	28.2455	16.9293	5.80641	16.548	16.9937	16.7709	-0.0349403	1.1232	-0.0311078	0.975184	0.999731	Not DEG
NONMMUG062224.1	10.4878	3.40601	0	0	0	0	4.63128	0	2.31564	4.7608	3.24182	1.46856	0.141952	NA	Not DEG
NONMMUG044677.2	0	3.40601	0	0	0	0	1.13534	0	0.567668	2.71864	3.98713	0.681855	0.495331	NA	Not DEG
NONMMUG065864.1	18.1153	0	18.013	16.7708	35.7397	45.4835	12.0428	32.6647	22.3537	-1.43186	1.09462	-1.30809	0.190841	0.999731	Not DEG
NONMMUG029803.2	21.9291	35.1954	18.013	34.4242	15.9888	12.5805	25.0458	20.9979	23.0218	0.250033	0.853236	0.293041	0.769491	0.999731	Not DEG
NONMMUG008153.2	0	0	0	7.06137	6.58363	0	0	4.54834	2.27417	-4.59045	3.24348	-1.41529	0.156985	NA	Not DEG
NONMMUG089849.1	0	0	0	0	3.76208	8.70961	0	4.15723	2.07861	-4.4584	3.36774	-1.32386	0.185551	NA	Not DEG
NONMMUG008523.2	12.3947	3.40601	0	0	0	0	5.2669	0	2.63345	4.94656	3.10167	1.5948	0.110756	NA	Not DEG
NONMMUG005506.2	40.9979	48.8194	25.0181	66.2004	19.7509	11.6128	38.2785	32.5214	35.3999	0.23188	0.814942	0.284536	0.776	0.999731	Not DEG
NONMMUG053081.1	6.67407	9.08268	7.00506	0	1.88104	0	7.58727	0.627013	4.10714	3.60239	2.15065	1.67502	0.0939303	NA	Not DEG
NONMMUG056078.1	67.6942	51.0901	41.0296	71.4964	61.1337	38.7094	53.2713	57.1132	55.1922	-0.100595	0.588215	-0.171018	0.864209	0.999731	Not DEG
NONMMUG008854.2	0	0	0	0	3.76208	0	0	1.25403	0.627013	-2.72965	3.97213	-0.687202	0.491955	NA	Not DEG
NONMMUG074671.1	0.953439	0	0	0	0	0	0.317813	0	0.158907	1.10549	4.08047	0.270923	0.78645	NA	Not DEG
NONMMUG082848.1	0	2.27067	0	0	0	0.967735	0.75689	0.322578	0.539734	1.16641	4.02714	0.289636	0.772094	NA	Not DEG
NONMMUG033859.2	0	0	0	10.5921	0	0	0	3.53069	1.76534	-4.226	3.93006	-1.0753	0.282239	NA	Not DEG
NONMMUG023857.2	38.1376	10.218	62.0448	3.53069	42.3234	38.7094	36.8001	28.1878	32.494	0.388161	0.957832	0.40525	0.685294	0.999731	Not DEG
NONMMUG053819.1	0.953439	1.13534	0	3.53069	11.2862	0	0.696258	4.93897	2.81762	-2.83507	2.58289	-1.09763	0.272365	NA	Not DEG
NONMMUG095419.1	0	0	2.00145	0	2.82156	10.6451	0.667149	4.48888	2.57801	-2.73933	2.88462	-0.949635	0.342298	NA	Not DEG
NONMMUG059542.1	0	2.27067	0	0	0	0	0.75689	0	0.378445	2.12818	4.02714	0.528459	0.597181	NA	Not DEG
NONMMUG091921.1	14.3016	30.6541	23.0166	20.3014	31.0371	23.2256	22.6574	24.8547	23.7561	-0.136086	0.806107	-0.168819	0.865939	0.999731	Not DEG
NONMMUG013202.2	17.1619	27.248	0	3.53069	8.46467	1.93547	14.8033	4.64361	9.72346	1.67036	1.52347	1.09642	0.272896	0.999731	Not DEG
NONMMUG074091.1	29.5566	22.7067	9.00651	5.29603	4.7026	20.3224	20.4233	10.107	15.2651	1.0181	1.0779	0.944518	0.344905	0.999731	Not DEG
NONMMUG024444.2	132.528	53.3608	112.081	69.731	91.2304	92.9025	99.3233	84.6213	91.9723	0.233392	0.523351	0.445957	0.655628	0.999731	Not DEG
NONMMUG059927.1	0	0	0	0	0	20.3224	0	6.77414	3.38707	-5.163	3.23301	-1.59697	0.110273	NA	Not DEG
NONMMUG074730.1	0	0	0	0	0	1.93547	0	0.645156	0.322578	-1.76457	4.03337	-0.437493	0.661754	NA	Not DEG
NONMMUG048246.1	0	0	0	5.29603	0	0	0	1.76534	0.882671	-3.22782	3.95316	-0.816516	0.414205	NA	Not DEG
NONMMUG005080.2	24.7894	65.8494	57.0412	52.0776	19.7509	42.5803	49.2267	38.1363	43.6815	0.36572	0.700238	0.52228	0.601476	0.999731	Not DEG
NONMMUG010560.2	91.5302	98.7742	102.074	60.9043	74.301	86.1284	97.4594	73.7779	85.6186	0.40205	0.4767	0.843403	0.399003	0.999731	Not DEG
NONMMUG058438.1	0	0	4.00289	0	0	0	1.3343	0	0.667149	2.96686	3.97454	0.746468	0.455385	NA	Not DEG
NONMMUG069014.1	0	2.27067	1.00072	0.882671	1.88104	1.93547	1.09046	1.56639	1.32843	-0.533954	2.98325	-0.178984	0.85795	NA	Not DEG
NONMMUG094860.1	0	0	0	0	4.7026	0	0	1.56753	0.783766	-3.05179	3.95914	-0.770821	0.440813	NA	Not DEG
NONMMUG075786.1	0	0	0	0	0	6.77414	0	2.25805	1.12902	-3.57695	3.94323	-0.907111	0.364348	NA	Not DEG
NONMMUG031278.2	0	0	5.00361	0	0	0	1.66787	0	0.833936	3.28825	3.9611	0.830137	0.406462	NA	Not DEG
NONMMUG051107.1	3.81376	0	0	0	3.76208	0	1.27125	1.25403	1.26264	0.0287447	3.86639	0.00743451	0.994068	NA	Not DEG
NONMMUG071263.1	44.8116	21.5714	6.00434	7.06137	16.9293	12.5805	24.1291	12.1904	18.1598	0.987822	1.02049	0.96799	0.333049	0.999731	Not DEG
NONMMUG014419.2	53.3926	107.857	103.074	99.7419	111.922	118.064	88.108	109.909	99.0085	-0.320303	0.490262	-0.653329	0.513544	0.999731	Not DEG
NONMMUG031426.2	21.9291	0	0	0	0	0	7.3097	0	3.65485	5.42015	3.14317	1.72442	0.0846319	NA	Not DEG
NONMMUG042850.2	61.0201	183.924	87.0629	112.982	158.948	203.224	110.669	158.385	134.527	-0.519224	0.521597	-0.995451	0.319517	0.999731	Not DEG
NONMMUG085993.1	0	0	8.00578	5.29603	8.46467	0	2.66859	4.5869	3.62775	-0.778981	2.53227	-0.307621	0.758371	NA	Not DEG
NONMMUG082336.1	0	0	0	0	0	30.9675	0	10.3225	5.16125	-5.77083	2.8542	-2.02187	0.0431894	0.918937	Down
NONMMUG042945.2	41.9513	27.248	40.0289	46.7816	45.1449	85.1606	36.4094	59.029	47.7192	-0.694539	0.626528	-1.10855	0.267624	0.999731	Not DEG
NONMMUG014962.2	14.3016	1.13534	9.00651	2.64801	12.2267	13.5483	8.14781	9.47435	8.81108	-0.209224	1.38052	-0.151555	0.879538	0.999731	Not DEG
NONMMUG025461.2	93.437	96.5035	126.091	121.809	105.338	119.031	105.344	115.393	110.368	-0.131326	0.44039	-0.298204	0.765547	0.999731	Not DEG
NONMMUG094116.1	0	0	0	4.41336	6.58363	0	0	3.66566	1.83283	-4.27888	3.51805	-1.21626	0.223884	NA	Not DEG
NONMMUG032510.2	8.58095	76.0675	24.0173	43.2509	142.959	14.516	36.2219	66.9086	51.5653	-0.889469	0.901448	-0.986711	0.323784	0.999731	Not DEG
NONMMUG003037.2	145.876	113.534	56.0405	151.819	72.42	145.16	105.15	123.133	114.142	-0.227764	0.531847	-0.42825	0.668469	0.999731	Not DEG
NONMMUG033985.2	21.9291	38.6014	31.0224	15.8881	41.3828	23.2256	30.5176	26.8322	28.6749	0.184719	0.772441	0.239136	0.811	0.999731	Not DEG
NONMMUG039363.2	44.8116	7.94735	26.0188	77.6751	23.513	31.9352	26.2593	44.3744	35.3168	-0.753482	0.833093	-0.904439	0.365763	0.999731	Not DEG
NONMMUG045668.2	10.4878	13.624	145.105	15.8881	13.1673	9.67735	56.4056	12.9109	34.6582	2.12702	0.985683	2.15791	0.0309348	0.850152	Up
NONMMUG013041.2	410.932	304.27	217.157	338.946	474.022	359.03	310.786	390.666	350.726	-0.329676	0.378734	-0.870467	0.384045	0.999731	Not DEG
NONMMUG066359.1	0	13.624	0	15.0054	0	7.74188	4.54134	7.58243	6.06189	-0.750123	2.19725	-0.341392	0.732809	0.999731	Not DEG
NONMMUG030700.2	289.845	273.616	156.113	308.052	305.669	319.352	239.858	311.024	275.441	-0.374998	0.38257	-0.980206	0.326984	0.999731	Not DEG
NONMMUG079133.1	0	0	0	0	0	3.87094	0	1.29031	0.645156	-2.76799	3.97043	-0.697153	0.485707	NA	Not DEG
NONMMUG058954.1	16.2085	27.248	10.0072	14.1227	19.7509	13.5483	17.8212	15.8073	16.8143	0.169932	0.940996	0.180588	0.856691	0.999731	Not DEG
NONMMUG096121.1	0.953439	3.40601	7.00506	0	2.82156	3.87094	3.78817	2.23083	3.0095	0.767857	2.19463	0.349879	0.726429	NA	Not DEG
NONMMUG055815.1	3.81376	0	2.00145	13.2401	0	10.6451	1.9384	7.96172	4.95006	-2.02524	2.04973	-0.988052	0.323127	NA	Not DEG
NONMMUG065991.1	7.62751	12.4887	3.00217	16.7708	21.6319	11.6128	7.70612	16.6718	12.189	-1.11923	1.11172	-1.00676	0.31405	0.999731	Not DEG
NONMMUG080028.1	0	0	4.00289	0	0	0	1.3343	0	0.667149	2.96686	3.97454	0.746468	0.455385	NA	Not DEG
NONMMUG037149.2	207.85	106.722	120.087	131.518	145.78	189.676	144.886	155.658	150.272	-0.101877	0.44982	-0.226485	0.820825	0.999731	Not DEG
NONMMUG078668.1	3.81376	0	0	0	0	15.4838	1.27125	5.16125	3.21625	-2.00706	2.98937	-0.6714	0.501966	NA	Not DEG
NONMMUG005710.2	128.714	102.18	73.0528	109.451	104.398	65.8059	101.316	93.2183	97.267	0.119961	0.494533	0.242573	0.808336	0.999731	Not DEG
NONMMUG002002.2	0	0	6.00434	0	0	0	2.00145	0	1.00072	3.55091	3.95211	0.898486	0.368926	NA	Not DEG
NONMMUG028827.2	66.7407	30.6541	41.0296	26.4801	20.6914	62.9027	46.1415	36.6914	41.4165	0.333731	0.718204	0.464675	0.642164	0.999731	Not DEG
NONMMUG085267.1	19.0688	13.624	22.0159	25.5975	15.0483	10.6451	18.2362	17.097	17.6666	0.0928179	0.91789	0.101121	0.919454	0.999731	Not DEG
NONMMUG088781.1	32.4169	4.54134	27.0195	7.94404	3.76208	15.4838	21.3259	9.06329	15.1946	1.2394	1.11406	1.1125	0.265922	0.999731	Not DEG
NONMMUG044461.2	10.4878	4.54134	15.0108	10.5921	3.76208	9.67735	10.0133	8.01049	9.01192	0.324487	1.25069	0.259446	0.795291	0.999731	Not DEG
NONMMUG019741.2	39.091	0	29.021	11.4747	32.9182	30.9675	22.704	25.1201	23.9121	-0.141322	1.13759	-0.12423	0.901133	0.999731	Not DEG
NONMMUG034995.2	34.3238	27.248	24.0173	98.8592	23.513	59.9995	28.5297	60.7906	44.6602	-1.09149	0.707362	-1.54305	0.122819	0.999731	Not DEG
NONMMUG086468.1	1.90688	0	0	0	0	0	0.635626	0	0.317813	1.90889	4.04654	0.471733	0.637118	NA	Not DEG
NONMMUG082656.1	0	0	1.00072	0	0	0	0.333574	0	0.166787	1.10549	4.08047	0.270923	0.78645	NA	Not DEG
NONMMUG074170.1	1.90688	9.08268	17.0123	6.1787	32.9182	8.70961	9.33395	15.9355	12.6347	-0.772619	1.22559	-0.630406	0.528429	0.999731	Not DEG
NONMMUG092474.1	9.53439	0	1.00072	21.1841	0	0	3.5117	7.06137	5.28654	-1.00311	2.37081	-0.42311	0.672215	0.999731	Not DEG
NONMMUG074065.1	11.4413	0	0	0	0	0	3.81376	0	1.90688	4.48191	3.92861	1.14084	0.253937	NA	Not DEG
NONMMUG066094.1	0	5.67668	0	0	0	0	1.89223	0	0.946113	3.46031	3.95503	0.874915	0.38162	NA	Not DEG
NONMMUG049076.1	379.469	404.179	282.204	315.114	335.765	511.932	355.284	387.604	371.444	-0.12557	0.366629	-0.342499	0.731975	0.999731	Not DEG
NONMMUG082320.1	0	0	0	0	0	1.93547	0	0.645156	0.322578	-1.76457	4.03337	-0.437493	0.661754	NA	Not DEG
NONMMUG091847.1	51.4857	54.4961	56.0405	40.6029	33.8587	63.8705	54.0074	46.1107	50.0591	0.228644	0.596299	0.383439	0.701395	0.999731	Not DEG
NONMMUG022117.2	7.62751	5.67668	44.0318	14.1227	20.6914	39.6771	19.112	24.8304	21.9712	-0.374332	1.01246	-0.369727	0.711586	0.999731	Not DEG
NONMMUG075016.1	0	7.94735	0	0	0	0	2.64912	0	1.32456	3.94785	3.94125	1.00168	0.316501	NA	Not DEG
NONMMUG003597.2	0	3.40601	0	0	0	0	1.13534	0	0.567668	2.71864	3.98713	0.681855	0.495331	NA	Not DEG
NONMMUG040339.2	0	0	0	0	0	5.80641	0	1.93547	0.967735	-3.35419	3.94929	-0.849316	0.395705	NA	Not DEG
NONMMUG070685.1	1.90688	0	2.00145	0	8.46467	11.6128	1.30277	6.6925	3.99764	-2.34458	2.21468	-1.05866	0.289756	NA	Not DEG
NONMMUG043173.2	0	6.81201	0	21.1841	5.64312	0	2.27067	8.94241	5.60654	-1.99722	2.23213	-0.894759	0.370916	0.999731	Not DEG
NONMMUG082996.1	9.53439	9.08268	0	23.8321	0	1.93547	6.20569	8.5892	7.39745	-0.472705	1.89656	-0.249243	0.803173	0.999731	Not DEG
NONMMUG040158.2	14.3016	19.3007	28.0202	33.5415	17.8699	27.0966	20.5408	26.1693	23.3551	-0.350286	0.816583	-0.428965	0.667949	0.999731	Not DEG
NONMMUG095363.1	7.62751	17.03	15.0108	0	50.788	14.516	13.2228	21.768	17.4954	-0.72002	1.29114	-0.557664	0.577074	0.999731	Not DEG
NONMMUG003039.2	4.7672	13.624	122.088	15.8881	11.2862	6.77414	46.8265	11.3162	29.0713	2.04792	1.06933	1.91514	0.0554744	0.999731	Not DEG
NONMMUG045666.2	3.81376	5.67668	18.013	4.41336	2.82156	3.87094	9.16781	3.70195	6.43488	1.30831	1.46147	0.895203	0.370679	0.999731	Not DEG
NONMMUG091378.1	0	0	0	14.1227	0	0	0	4.70758	2.35379	-4.64083	3.6485	-1.27198	0.203379	NA	Not DEG
NONMMUG042602.2	0	37.4661	0	0	0	0	12.4887	0	6.24434	6.18764	2.70757	2.28531	0.0222944	0.724378	Up
NONMMUG022992.2	25.7429	11.3534	12.0087	55.6083	13.1673	15.4838	16.3683	28.0864	22.2274	-0.777787	0.937339	-0.829782	0.406662	0.999731	Not DEG
NONMMUG011901.2	53.3926	28.3834	27.0195	22.9495	12.2267	45.4835	36.2652	26.8866	31.5759	0.434309	0.78959	0.550044	0.582289	0.999731	Not DEG
NONMMUG051834.1	0	0	0	0.882671	5.64312	0	0	2.17526	1.08763	-3.52521	3.94456	-0.89369	0.371488	NA	Not DEG
NONMMUG059272.1	0	0	0	5.29603	17.8699	0	0	7.72196	3.86098	-5.35328	2.7247	-1.96472	0.0494461	NA	Down
NONMMUG091059.1	11.4413	32.9247	8.00578	13.2401	13.1673	22.2579	17.4573	16.2217	16.8395	0.101501	0.991509	0.102371	0.918463	0.999731	Not DEG
NONMMUG051969.1	7.62751	15.8947	5.00361	18.5361	12.2267	20.3224	9.50861	17.0284	13.2685	-0.846701	1.05567	-0.802053	0.422522	0.999731	Not DEG
NONMMUG022345.2	64.8339	56.7668	71.0513	26.4801	87.4683	66.7737	64.2173	60.2407	62.229	0.0937299	0.609676	0.153737	0.877817	0.999731	Not DEG
NONMMUG026722.2	2.86032	13.624	7.00506	34.4242	26.3345	6.77414	7.8298	22.511	15.1704	-1.53352	1.10293	-1.3904	0.164407	0.999731	Not DEG
NONMMUG015351.2	0	0	0	0	0	3.87094	0	1.29031	0.645156	-2.76799	3.97043	-0.697153	0.485707	NA	Not DEG
NONMMUG005424.2	12.3947	4.54134	10.0072	7.94404	15.0483	5.80641	8.98109	9.59959	9.29034	-0.0919704	1.22152	-0.075292	0.939982	0.999731	Not DEG
NONMMUG091288.1	34.3238	6.81201	10.0072	1.76534	11.2862	6.77414	17.0477	6.60857	11.8281	1.37342	1.22827	1.11817	0.263493	0.999731	Not DEG
NONMMUG056703.1	0	1.13534	1.00072	0	0	0	0.712019	0	0.35601	2.05035	4.0337	0.508306	0.611239	NA	Not DEG
NONMMUG042380.2	40.9979	84.0148	26.0188	21.1841	19.7509	24.1934	50.3438	21.7095	36.0266	1.21121	0.729689	1.6599	0.0969341	0.999731	Not DEG
NONMMUG035781.2	100.111	60.1728	150.108	89.1498	72.42	100.644	103.464	87.4047	95.4344	0.244748	0.517202	0.473216	0.636059	0.999731	Not DEG
NONMMUG071136.1	0	0	0	0	1.88104	0.967735	0	0.949591	0.474795	-2.32687	3.99295	-0.582745	0.560065	NA	Not DEG
NONMMUG085663.1	0	0	0	0	15.0483	0	0	5.0161	2.50805	-4.73037	3.57153	-1.32447	0.185347	NA	Not DEG
NONMMUG061916.1	0	0	0	0.882671	0	0	0	0.294224	0.147112	-0.818059	4.08047	-0.200481	0.841104	NA	Not DEG
NONMMUG018995.2	0	0	0	0	0	2.9032	0	0.967735	0.483867	-2.35177	3.99149	-0.589196	0.55573	NA	Not DEG
NONMMUG016698.2	195.455	71.5261	151.109	104.155	188.104	227.418	139.363	173.226	156.294	-0.311749	0.505547	-0.616656	0.537462	0.999731	Not DEG
NONMMUG032061.2	2.86032	0	0	0	0	12.5805	0.953439	4.19352	2.57348	-2.12066	3.21913	-0.658768	0.510044	NA	Not DEG
NONMMUG009752.2	37.1841	62.4434	12.0087	12.3574	24.4535	21.2902	37.2121	19.367	28.2895	0.940959	0.84528	1.11319	0.265626	0.999731	Not DEG
NONMMUG084766.1	19.0688	0	7.00506	0	7.52415	31.9352	8.69128	13.1531	10.9222	-0.590938	1.68562	-0.350576	0.725906	0.999731	Not DEG
NONMMUG018657.2	138.249	126.022	162.117	134.166	167.412	113.225	142.129	138.268	140.199	0.0400219	0.419258	0.0954589	0.92395	0.999731	Not DEG
NONMMUG001979.2	0	0	0	0	0	3.87094	0	1.29031	0.645156	-2.76799	3.97043	-0.697153	0.485707	NA	Not DEG
NONMMUG062420.1	41.9513	24.9774	66.0477	76.7924	33.8587	85.1606	44.3255	65.2706	54.798	-0.556398	0.652219	-0.853085	0.393612	0.999731	Not DEG
NONMMUG046728.1	0	0	0	1.76534	11.2862	0	0	4.35052	2.17526	-4.52525	3.34201	-1.35405	0.17572	NA	Not DEG
NONMMUG015535.2	522.485	458.675	519.375	440.453	462.735	458.706	500.178	453.965	477.072	0.14008	0.308175	0.454546	0.649436	0.999731	Not DEG
NONMMUG084065.1	0	0	0	1.76534	0	0	0	0.588448	0.294224	-1.64922	4.04373	-0.407847	0.683386	NA	Not DEG
NONMMUG071840.1	0	0	0	0	2.82156	0	0	0.940519	0.47026	-2.31429	3.9937	-0.579485	0.562262	NA	Not DEG
NONMMUG028583.2	0.953439	1.13534	1.00072	0.882671	0.940519	4.83867	1.02983	2.22062	1.62523	-1.10692	2.59813	-0.426045	0.670075	NA	Not DEG
NONMMUG062632.1	0	0	0	0	0	11.6128	0	3.87094	1.93547	-4.35547	3.91835	-1.11156	0.266329	NA	Not DEG
NONMMUG043260.3	6.67407	0	0	0	0	0	2.22469	0	1.11235	3.70621	3.9475	0.938875	0.347795	NA	Not DEG
NONMMUG069859.1	0	0	0	0	0	1.93547	0	0.645156	0.322578	-1.76457	4.03337	-0.437493	0.661754	NA	Not DEG
NONMMUG008907.2	35.2772	35.1954	37.0267	30.8935	47.026	37.7416	35.8331	38.5537	37.1934	-0.10505	0.649889	-0.161643	0.871587	0.999731	Not DEG
NONMMUG001304.2	0	0	4.00289	6.1787	0	0	1.3343	2.05957	1.69693	-0.626584	3.70608	-0.169069	0.865742	NA	Not DEG
NONMMUG009377.2	136.342	127.158	176.127	228.612	124.149	204.192	146.542	185.651	166.096	-0.341131	0.428407	-0.796278	0.425871	0.999731	Not DEG
NONMMUG042408.2	0	2.27067	5.00361	0	0.940519	0	2.42476	0.313506	1.36913	2.86307	3.61194	0.792669	0.427971	NA	Not DEG
NONMMUG049219.1	6.67407	19.3007	45.0325	11.4747	15.9888	24.1934	23.6691	17.219	20.444	0.459971	0.966207	0.476058	0.634033	0.999731	Not DEG
NONMMUG049803.1	2.86032	2.27067	1.00072	0	12.2267	0	2.0439	4.07558	3.05974	-0.994611	2.49343	-0.398893	0.689972	NA	Not DEG
NONMMUG045512.2	1.90688	1.13534	3.00217	0.882671	2.82156	0.967735	2.01479	1.55732	1.78606	0.375747	2.44127	0.153914	0.877677	NA	Not DEG
NONMMUG018869.2	2.86032	3.40601	5.00361	0	0	8.70961	3.75665	2.9032	3.32992	0.376545	2.33998	0.160918	0.872158	NA	Not DEG
NONMMUG080997.1	0	0	0	10.5921	0	0	0	3.53069	1.76534	-4.226	3.93006	-1.0753	0.282239	NA	Not DEG
NONMMUG041310.2	5.72063	0	7.00506	0	0	0	4.2419	0	2.12095	4.63503	3.32284	1.3949	0.163046	NA	Not DEG
NONMMUG015059.2	22.8825	60.1728	43.0311	57.3736	29.1561	27.0966	42.0288	37.8754	39.9521	0.146255	0.706376	0.20705	0.835971	0.999731	Not DEG
NONMMUG056037.2	5.72063	9.08268	16.0116	5.29603	11.2862	71.6124	10.2716	29.3982	19.8349	-1.51568	1.10702	-1.36915	0.170951	0.999731	Not DEG
NONMMUG031673.2	99.1577	170.3	144.104	112.099	170.234	204.192	137.854	162.175	150.015	-0.234972	0.448525	-0.523877	0.600364	0.999731	Not DEG
NONMMUG046592.1	25.7429	0	13.0094	19.4188	0	0	12.9174	6.47292	9.69517	0.995499	1.95095	0.510263	0.609867	0.999731	Not DEG
NONMMUG048332.1	78.182	22.7067	21.0152	22.9495	34.7992	50.3222	40.6346	36.0236	38.3291	0.1776	0.771049	0.230336	0.817831	0.999731	Not DEG
NONMMUG056509.1	4.7672	0	0	0	0	0	1.58907	0	0.794533	3.22255	3.96361	0.813035	0.416198	NA	Not DEG
NONMMUG053702.1	0	0	0	0	0	7.74188	0	2.58063	1.29031	-3.76987	3.93869	-0.957138	0.338498	NA	Not DEG
NONMMUG063372.1	10.4878	4.54134	20.0145	6.1787	15.9888	49.3545	11.6812	23.8407	17.7609	-1.02381	1.08053	-0.947511	0.343379	0.999731	Not DEG
NONMMUG081282.1	0	0	0	0	0	7.74188	0	2.58063	1.29031	-3.76987	3.93869	-0.957138	0.338498	NA	Not DEG
NONMMUG090039.1	40.9979	39.7367	27.0195	45.8989	36.6802	32.903	35.918	38.494	37.206	-0.100853	0.65769	-0.153344	0.878127	0.999731	Not DEG
NONMMUG086089.1	26.6963	17.03	0	25.5975	31.9777	45.4835	14.5754	34.3529	24.4642	-1.23583	1.08166	-1.14254	0.25323	0.999731	Not DEG
NONMMUG029249.2	237.406	331.518	246.178	267.449	252.059	274.837	271.701	264.782	268.241	0.0365333	0.355288	0.102827	0.9181	0.999731	Not DEG
NONMMUG020287.2	0	2.27067	1.00072	0	0	0.967735	1.09046	0.322578	0.706521	1.70327	3.99014	0.426869	0.669475	NA	Not DEG
NONMMUG026025.2	2.86032	21.5714	7.00506	1.76534	12.2267	0	10.4789	4.66403	7.57147	1.16407	1.65404	0.703769	0.481577	0.999731	Not DEG
NONMMUG064529.1	0	0	0	0	0	3.87094	0	1.29031	0.645156	-2.76799	3.97043	-0.697153	0.485707	NA	Not DEG
NONMMUG093807.1	12.3947	24.9774	17.0123	2.64801	4.7026	21.2902	18.1281	9.54692	13.8375	0.927204	1.13757	0.815071	0.415032	0.999731	Not DEG
NONMMUG050233.1	19.0688	11.3534	22.0159	22.0668	16.9293	13.5483	17.4793	17.5148	17.4971	-0.00155515	0.908386	-0.00171199	0.998634	0.999731	Not DEG
NONMMUG012839.2	31.4635	12.4887	29.021	15.0054	18.8104	17.4192	24.3244	17.0783	20.7014	0.513582	0.861285	0.596297	0.550977	0.999731	Not DEG
NONMMUG059033.1	0	0	7.00506	0	0	23.2256	2.33502	7.74188	5.03845	-1.72432	2.62222	-0.657579	0.510809	NA	Not DEG
NONMMUG041270.3	0	0	0	0	3.76208	0	0	1.25403	0.627013	-2.72965	3.97213	-0.687202	0.491955	NA	Not DEG
NONMMUG033205.2	245.034	307.676	183.132	259.505	187.163	252.579	245.281	233.082	239.182	0.0728946	0.38813	0.18781	0.851026	0.999731	Not DEG
NONMMUG017108.2	76.2751	23.842	26.0188	51.1949	23.513	13.5483	42.0453	29.4187	35.732	0.515592	0.810055	0.636491	0.524456	0.999731	Not DEG
NONMMUG078252.1	14.3016	22.7067	4.00289	31.7762	10.3457	59.0318	13.6704	33.7179	23.6941	-1.30626	0.971042	-1.34522	0.178555	0.999731	Not DEG
NONMMUG000076.2	112.506	20.436	106.077	105.921	352.695	20.3224	79.6728	159.646	119.659	-1.0012	0.801785	-1.24871	0.21177	0.999731	Not DEG
NONMMUG060333.1	7.62751	4.54134	22.0159	5.29603	7.52415	20.3224	11.3949	11.0475	11.2212	0.0494503	1.20831	0.0409252	0.967356	0.999731	Not DEG
NONMMUG027728.2	46.7185	24.9774	31.0224	94.4458	81.8252	83.2252	34.2394	86.4987	60.3691	-1.33403	0.563036	-2.36936	0.0178191	0.669098	Down
NONMMUG052066.1	0	0	0	0	3.76208	7.74188	0	3.83465	1.91733	-4.34189	3.46785	-1.25204	0.210555	NA	Not DEG
NONMMUG065654.1	0	0	0	0.882671	0	4.83867	0	1.90711	0.953557	-3.33381	3.94989	-0.844028	0.398654	NA	Not DEG
NONMMUG014556.2	0	0	0	0	0	7.74188	0	2.58063	1.29031	-3.76987	3.93869	-0.957138	0.338498	NA	Not DEG
NONMMUG077983.1	4.7672	0	11.008	5.29603	5.64312	21.2902	5.25838	10.7431	8.00074	-1.02257	1.54178	-0.663238	0.507178	0.999731	Not DEG
NONMMUG077979.1	2.86032	10.218	10.0072	11.4747	12.2267	21.2902	7.69519	14.9972	11.3462	-0.966527	1.1414	-0.846789	0.397113	0.999731	Not DEG
NONMMUG096321.1	17.1619	0	0	0	0	0	5.72063	0	2.86032	5.06666	3.40392	1.48848	0.136626	NA	Not DEG
NONMMUG014479.2	0	0	0	17.6534	0	0	0	5.88448	2.94224	-4.96268	3.38017	-1.46817	0.142057	NA	Not DEG
NONMMUG012474.2	0	13.624	4.00289	8.82671	32.9182	29.9998	5.87564	23.9149	14.8953	-2.03932	1.27295	-1.60204	0.109147	0.999731	Not DEG
NONMMUG067184.1	11.4413	5.67668	2.00145	0.882671	1.88104	0	6.37313	0.921237	3.64718	2.78824	2.08492	1.33734	0.181112	NA	Not DEG
NONMMUG083401.1	10.4878	7.94735	17.0123	0	0	2.9032	11.8158	0.967735	6.39178	3.63085	1.82047	1.99445	0.0461027	0.941164	Up
NONMMUG016425.2	367.074	418.939	396.286	278.924	385.613	376.449	394.1	346.995	370.547	0.183702	0.335801	0.547057	0.58434	0.999731	Not DEG
NONMMUG089601.1	50.5323	52.2254	75.0542	44.1336	32.9182	33.8707	59.2706	36.9742	48.1224	0.680414	0.597805	1.13819	0.255043	0.999731	Not DEG
NONMMUG021544.2	4.7672	5.67668	2.00145	2.64801	5.64312	13.5483	4.14844	7.2798	5.71412	-0.81166	1.5378	-0.527807	0.597633	0.999731	Not DEG
NONMMUG009007.2	0	0	3.00217	0	0	3.87094	1.00072	1.29031	1.14552	-0.359022	3.88439	-0.0924268	0.926359	NA	Not DEG
NONMMUG027172.2	75.3217	59.0374	34.0246	28.2455	69.5984	70.6446	56.1279	56.1628	56.1454	0.000431996	0.636244	0.000678978	0.999458	0.999731	Not DEG
NONMMUG075479.1	3.81376	3.40601	3.00217	13.2401	0.940519	5.80641	3.40731	6.66233	5.03482	-0.969285	1.66235	-0.583081	0.559839	NA	Not DEG
NONMMUG044769.2	44.8116	59.0374	38.0275	60.0217	48.907	37.7416	47.2922	48.8901	48.0911	-0.0500535	0.602755	-0.0830413	0.933819	0.999731	Not DEG
NONMMUG036066.2	47.672	30.6541	54.039	40.6029	44.2044	48.3867	44.1217	44.398	44.2598	-0.00695521	0.617945	-0.0112554	0.99102	0.999731	Not DEG
NONMMUG063566.1	3.81376	6.81201	14.0101	9.70939	25.394	16.4515	8.21196	17.185	12.6985	-1.06474	1.1061	-0.962606	0.335745	0.999731	Not DEG
NONMMUG075751.1	0	7.94735	0	7.94404	12.2267	9.67735	2.64912	9.94938	6.29925	-1.93154	1.83364	-1.05339	0.292163	0.999731	Not DEG
NONMMUG004111.2	16.2085	21.5714	20.0145	17.6534	23.513	25.1611	19.2648	22.1092	20.687	-0.199168	0.82905	-0.240237	0.810147	0.999731	Not DEG
NONMMUG017913.2	48.6254	46.5487	41.0296	15.8881	21.6319	30.9675	45.4013	22.8292	34.1152	0.993485	0.691204	1.43733	0.150626	0.999731	Not DEG
NONMMUG022926.2	2.86032	0	11.008	0	0	3.87094	4.62276	1.29031	2.95653	1.85096	2.71771	0.681072	0.495826	NA	Not DEG
NONMMUG010528.2	5.72063	48.8194	0	7.94404	28.2156	7.74188	18.18	14.6338	16.4069	0.308297	1.37198	0.22471	0.822205	0.999731	Not DEG
NONMMUG085442.1	0	0	10.0072	0	0	0	3.33574	0	1.66787	4.28711	3.93405	1.08974	0.275826	NA	Not DEG
NONMMUG018431.2	50.5323	2.27067	3.00217	24.7148	65.8363	17.4192	18.6017	35.9901	27.2959	-0.94646	1.11362	-0.849893	0.395385	0.999731	Not DEG
NONMMUG073854.1	41.9513	31.7894	19.0137	61.787	48.907	71.6124	30.9181	60.7688	45.8435	-0.974076	0.635135	-1.53365	0.125115	0.999731	Not DEG
NONMMUG007312.2	3.81376	9.08268	8.00578	0	6.58363	12.5805	6.96741	6.38806	6.67773	0.126331	1.62799	0.0775993	0.938147	0.999731	Not DEG
NONMMUG066147.1	4.7672	0	10.0072	0	0	0	4.92481	0	2.4624	4.85004	3.15317	1.53815	0.124012	NA	Not DEG
NONMMUG047421.1	0	3.40601	36.026	22.9495	14.1078	2.9032	13.144	13.3201	13.2321	-0.0194521	1.47305	-0.0132053	0.989464	0.999731	Not DEG
NONMMUG010273.2	0	0	0	0	0	11.6128	0	3.87094	1.93547	-4.35547	3.91835	-1.11156	0.266329	NA	Not DEG
NONMMUG056154.1	3.81376	3.40601	4.00289	0	3.76208	5.80641	3.74088	3.18949	3.46519	0.23471	2.02675	0.115806	0.907806	NA	Not DEG
NONMMUG023716.2	557.762	30.6541	684.494	657.59	703.508	219.676	424.303	526.925	475.614	-0.312352	1.12874	-0.276726	0.781991	0.999731	Not DEG
NONMMUG028016.2	53.3926	65.8494	47.034	22.0668	23.513	91.9348	55.4253	45.8382	50.6318	0.274996	0.713639	0.385344	0.699983	0.999731	Not DEG
NONMMUG001352.2	21.9291	12.4887	8.00578	7.06137	15.9888	0	14.1412	7.6834	10.9123	0.88014	1.38015	0.637715	0.523659	0.999731	Not DEG
NONMMUG016068.2	113.459	127.158	124.09	103.273	106.279	120.967	121.569	110.173	115.871	0.141935	0.425471	0.333595	0.738685	0.999731	Not DEG
NONMMUG036200.2	0	0	0	0	0	3.87094	0	1.29031	0.645156	-2.76799	3.97043	-0.697153	0.485707	NA	Not DEG
NONMMUG057020.1	0	0	0	0	11.2862	0	0	3.76208	1.88104	-4.3153	3.92866	-1.09841	0.272023	NA	Not DEG
NONMMUG021111.2	0	0	0	0	0	11.6128	0	3.87094	1.93547	-4.35547	3.91835	-1.11156	0.266329	NA	Not DEG
NONMMUG078164.1	24.7894	15.8947	6.00434	7.06137	4.7026	22.2579	15.5628	11.3406	13.4517	0.45965	1.13206	0.406028	0.684722	0.999731	Not DEG
NONMMUG008112.2	56.2529	91.9622	77.0557	68.8484	34.7992	88.0638	75.0902	63.9038	69.497	0.231766	0.573019	0.404465	0.685871	0.999731	Not DEG
NONMMUG029787.2	17.1619	19.3007	12.0087	3.53069	3.76208	14.516	16.1571	7.26959	11.7133	1.15531	1.14947	1.00508	0.314857	0.999731	Not DEG
NONMMUG090144.1	3.81376	0	0	0	2.82156	0	1.27125	0.940519	1.10589	0.444112	3.88855	0.11421	0.909071	NA	Not DEG
NONMMUG043355.2	84.8561	48.8194	61.0441	37.9549	24.4535	12.5805	64.9065	24.9963	44.9514	1.3753	0.675616	2.03562	0.0417881	0.918937	Up
NONMMUG038271.2	15.255	22.7067	16.0116	4.41336	7.52415	9.67735	17.9911	7.20495	12.598	1.32128	1.05673	1.25035	0.211172	0.999731	Not DEG
NONMMUG074876.1	1.90688	7.94735	4.00289	0	7.52415	7.74188	4.61904	5.08868	4.85386	-0.142169	1.83647	-0.0774144	0.938294	NA	Not DEG
NONMMUG050350.1	0	0	0	0	2.82156	0	0	0.940519	0.47026	-2.31429	3.9937	-0.579485	0.562262	NA	Not DEG
NONMMUG062832.1	0	0	1.00072	0	0	0	0.333574	0	0.166787	1.10549	4.08047	0.270923	0.78645	NA	Not DEG
NONMMUG023923.2	2.86032	0	0	0	0	0	0.953439	0	0.47672	2.48945	4.0008	0.62224	0.533784	NA	Not DEG
NONMMUG062991.1	0	12.4887	7.00506	0	5.64312	0	6.49792	1.88104	4.18948	1.78711	2.41559	0.739823	0.459407	NA	Not DEG
NONMMUG063401.1	2.86032	7.94735	12.0087	11.4747	0	2.9032	7.60545	4.79264	6.19905	0.660787	1.70152	0.388352	0.697756	0.999731	Not DEG
NONMMUG066497.1	0	9.08268	6.00434	0	38.5613	0	5.02901	12.8538	8.94138	-1.3583	2.04356	-0.664673	0.506259	0.999731	Not DEG
NONMMUG012021.2	42.9048	40.8721	35.0253	33.5415	18.8104	17.4192	39.6007	23.257	31.4289	0.766076	0.717729	1.06736	0.285809	0.999731	Not DEG
NONMMUG065733.1	0	0	1.00072	0	0	0	0.333574	0	0.166787	1.10549	4.08047	0.270923	0.78645	NA	Not DEG
NONMMUG005239.2	131.575	207.766	13.0094	142.993	252.059	18.387	117.45	137.813	127.632	-0.231632	0.836134	-0.277028	0.781759	0.999731	Not DEG
NONMMUG006698.2	0	3.40601	12.0087	5.29603	4.7026	2.9032	5.13823	4.30061	4.71942	0.255631	1.85093	0.13811	0.890154	NA	Not DEG
NONMMUG009561.3	0	0	0	0	0	2.9032	0	0.967735	0.483867	-2.35177	3.99149	-0.589196	0.55573	NA	Not DEG
NONMMUG054847.1	15.255	0	0	0	0	0	5.08501	0	2.5425	4.8968	3.54343	1.38194	0.166992	NA	Not DEG
NONMMUG077028.1	0	6.81201	0	0	0	0	2.27067	0	1.13534	3.72458	3.94699	0.943649	0.345349	NA	Not DEG
NONMMUG054322.1	0	4.54134	6.00434	0	0	2.9032	3.51523	0.967735	2.24148	1.8673	2.98087	0.626429	0.531034	NA	Not DEG
NONMMUG020053.2	122.04	74.9321	74.0535	113.865	59.2527	69.6769	90.3419	80.9314	85.6367	0.158937	0.526391	0.301938	0.7627	0.999731	Not DEG
NONMMUG010980.2	20.9757	19.3007	37.0267	13.2401	14.1078	23.2256	25.7677	16.8578	21.3128	0.614269	0.850465	0.722275	0.470126	0.999731	Not DEG
NONMMUG046629.2	0	0	0	17.6534	0	5.80641	0	7.81995	3.90997	-5.37247	2.71234	-1.98075	0.0476189	NA	Down
NONMMUG091082.1	0	0	0	0	0	1.93547	0	0.645156	0.322578	-1.76457	4.03337	-0.437493	0.661754	NA	Not DEG
NONMMUG005244.2	40.0444	86.2855	52.0376	25.5975	67.7174	35.8062	59.4558	43.0403	51.2481	0.464805	0.655307	0.709294	0.478142	0.999731	Not DEG
NONMMUG091609.1	0	1.13534	0	0	0.940519	0	0.378445	0.313506	0.345976	0.143722	4.08047	0.0352219	0.971903	NA	Not DEG
NONMMUG083967.1	3.81376	1.13534	0	2.64801	0	0	1.6497	0.882671	1.26618	0.897725	3.71362	0.241739	0.808982	NA	Not DEG
NONMMUG019508.2	0.953439	9.08268	2.00145	1.76534	32.9182	15.4838	4.01252	16.7224	10.3675	-2.07406	1.42558	-1.45489	0.145699	0.999731	Not DEG
NONMMUG007765.2	34.3238	38.6014	57.0412	52.0776	42.3234	27.0966	43.3221	40.4992	41.9107	0.096388	0.650718	0.148126	0.882244	0.999731	Not DEG
NONMMUG041880.2	26.6963	9.08268	7.00506	9.70939	24.4535	14.516	14.2613	16.2263	15.2438	-0.181586	1.03979	-0.174638	0.861364	0.999731	Not DEG
NONMMUG045441.2	7.62751	35.1954	35.0253	24.7148	18.8104	41.6126	25.9494	28.3793	27.1643	-0.131321	0.856935	-0.153245	0.878205	0.999731	Not DEG
NONMMUG002657.2	3.81376	4.54134	4.00289	3.53069	3.76208	4.83867	4.11933	4.04381	4.08157	0.0264562	1.67094	0.0158331	0.987368	NA	Not DEG
NONMMUG021779.2	21.9291	57.9021	39.0282	23.8321	39.5018	36.7739	39.6198	33.3693	36.4945	0.24566	0.706887	0.347524	0.728198	0.999731	Not DEG
NONMMUG062514.1	0	0	8.00578	0	0	0	2.66859	0	1.3343	3.96548	3.94083	1.00625	0.314294	NA	Not DEG
NONMMUG004659.2	11.4413	13.624	0	0.882671	0	0	8.3551	0.294224	4.32466	4.64767	2.45791	1.8909	0.0586372	NA	Not DEG
NONMMUG088615.1	22.8825	52.2254	21.0152	25.5975	28.2156	69.6769	32.041	41.1633	36.6022	-0.363785	0.759529	-0.478961	0.631966	0.999731	Not DEG
NONMMUG007392.2	61.0201	6.81201	36.026	499.592	9.40519	22.2579	34.6194	177.085	105.852	-2.35389	1.59653	-1.47438	0.140379	0.999731	Not DEG
NONMMUG066771.1	0	0	0	0	20.6914	5.80641	0	8.83261	4.4163	-5.54637	2.62068	-2.11638	0.0343121	NA	Down
NONMMUG044867.2	0	1.13534	2.00145	0	2.82156	0.967735	1.04559	1.2631	1.15435	-0.273435	3.47901	-0.0785957	0.937354	NA	Not DEG
NONMMUG022627.2	146.83	26.1127	18.013	12.3574	20.6914	133.547	63.6518	55.5321	59.5919	0.199711	0.936129	0.213337	0.831064	0.999731	Not DEG
NONMMUG074145.1	11.4413	10.218	3.00217	2.64801	15.9888	3.87094	8.22049	7.50259	7.86154	0.13238	1.39529	0.0948763	0.924413	0.999731	Not DEG
NONMMUG003090.2	2.86032	37.4661	38.0275	8.82671	6.58363	18.387	26.1179	11.2658	18.6919	1.21231	1.08255	1.11986	0.262773	0.999731	Not DEG
NONMMUG027864.2	21.9291	13.624	4.00289	16.7708	19.7509	12.5805	13.1853	16.3674	14.7764	-0.310931	1.04161	-0.298509	0.765315	0.999731	Not DEG
NONMMUG013472.2	14.3016	15.8947	23.0166	18.5361	22.5725	34.8384	17.7376	25.3157	21.5267	-0.511984	0.837569	-0.611274	0.541018	0.999731	Not DEG
NONMMUG055317.1	0	11.3534	0	0	0	1.93547	3.78445	0.645156	2.2148	2.55658	3.40344	0.751174	0.452548	NA	Not DEG
NONMMUG092983.1	3.81376	0	0	0	0	2.9032	1.27125	0.967735	1.11949	0.40663	3.88628	0.104632	0.916668	NA	Not DEG
NONMMUG050522.1	0	0	5.00361	9.70939	2.82156	0	1.66787	4.17698	2.92243	-1.32232	2.72821	-0.484684	0.6279	NA	Not DEG
NONMMUG063260.1	0	0	0	0	0	3.87094	0	1.29031	0.645156	-2.76799	3.97043	-0.697153	0.485707	NA	Not DEG
NONMMUG036475.2	36.2307	105.586	8.00578	40.6029	5.64312	6.77414	49.9409	17.6734	33.8071	1.49321	1.01684	1.46848	0.141973	0.999731	Not DEG
NONMMUG094821.1	14.3016	3.40601	0	0	6.58363	1.93547	5.90253	2.8397	4.37112	1.06104	2.17414	0.488026	0.625531	NA	Not DEG
NONMMUG020350.2	82.9492	61.3081	43.0311	68.8484	83.7062	56.1286	62.4295	69.5611	65.9953	-0.15557	0.551769	-0.281947	0.777984	0.999731	Not DEG
NONMMUG011540.2	2.86032	0	1.00072	1.76534	0.940519	0	1.28701	0.901954	1.09448	0.516076	3.54167	0.145715	0.884146	NA	Not DEG
NONMMUG006925.2	0	0	0	6.1787	0	0	0	2.05957	1.02978	-3.4497	3.94658	-0.8741	0.382064	NA	Not DEG
NONMMUG044503.2	8.58095	6.81201	30.0217	4.41336	13.1673	9.67735	15.1382	9.08599	12.1121	0.739953	1.15865	0.638635	0.52306	0.999731	Not DEG
NONMMUG061667.1	0	0	0	0	0	3.87094	0	1.29031	0.645156	-2.76799	3.97043	-0.697153	0.485707	NA	Not DEG
NONMMUG036754.2	28.6032	18.1654	68.0492	42.3682	18.8104	35.8062	38.2726	32.3283	35.3004	0.244703	0.771919	0.317006	0.751239	0.999731	Not DEG
NONMMUG041470.2	26.6963	31.7894	26.0188	22.0668	30.0966	14.516	28.1682	22.2265	25.1973	0.340573	0.779385	0.436977	0.662128	0.999731	Not DEG
NONMMUG063635.1	21.9291	13.624	16.0116	16.7708	2.82156	27.0966	17.1882	15.563	16.3756	0.145347	1.05116	0.138272	0.890025	0.999731	Not DEG
NONMMUG039787.2	467.185	766.351	638.461	569.323	593.468	686.124	623.999	616.305	620.152	0.0175598	0.331137	0.0530287	0.957709	0.999731	Not DEG
NONMMUG044071.3	0.953439	0	0	0	0	0	0.317813	0	0.158907	1.10549	4.08047	0.270923	0.78645	NA	Not DEG
NONMMUG036641.3	19.0688	43.1427	25.0181	17.6534	8.46467	15.4838	29.0765	13.8673	21.4719	1.06481	0.865656	1.23006	0.218674	0.999731	Not DEG
NONMMUG094515.1	0.953439	0	11.008	0	8.46467	0	3.98713	2.82156	3.40434	0.502195	2.66727	0.188281	0.850657	NA	Not DEG
NONMMUG075870.1	3.81376	0	12.0087	0	0	0	5.27414	0	2.63707	4.9487	3.0876	1.60276	0.108987	NA	Not DEG
NONMMUG071508.1	0	1.13534	0	0	0	0	0.378445	0	0.189223	1.10549	4.08047	0.270923	0.78645	NA	Not DEG
NONMMUG019255.2	42.9048	70.3908	84.0607	67.083	28.2156	30.9675	65.7854	42.0887	53.9371	0.642067	0.636022	1.0095	0.312733	0.999731	Not DEG
NONMMUG015698.2	3.81376	0	0	0	0	0	1.27125	0	0.635626	2.90211	3.97762	0.729611	0.465628	NA	Not DEG
NONMMUG054402.1	1.90688	0	0	0	0	0	0.635626	0	0.317813	1.90889	4.04654	0.471733	0.637118	NA	Not DEG
NONMMUG064163.1	118.226	165.759	232.168	125.339	193.747	146.128	172.051	155.071	163.561	0.149917	0.440073	0.340665	0.733356	0.999731	Not DEG
NONMMUG072602.1	0	0	0	3.53069	9.40519	9.67735	0	7.53774	3.76887	-5.31757	2.39882	-2.21674	0.0266405	NA	Down
NONMMUG084801.1	0	5.67668	0	9.70939	2.82156	0	1.89223	4.17698	3.0346	-1.15969	2.70195	-0.429205	0.667774	NA	Not DEG
NONMMUG065363.1	0	0	0	0	0	6.77414	0	2.25805	1.12902	-3.57695	3.94323	-0.907111	0.364348	NA	Not DEG
NONMMUG068385.1	0	0	0	0	2.82156	0	0	0.940519	0.47026	-2.31429	3.9937	-0.579485	0.562262	NA	Not DEG
NONMMUG012902.2	47.672	84.0148	100.072	113.865	70.5389	65.8059	77.253	83.4032	80.3281	-0.112121	0.542248	-0.206771	0.836189	0.999731	Not DEG
NONMMUG054170.1	0.953439	0	0	0	0	0	0.317813	0	0.158907	1.10549	4.08047	0.270923	0.78645	NA	Not DEG
NONMMUG023956.2	0	0	0	0	0	7.74188	0	2.58063	1.29031	-3.76987	3.93869	-0.957138	0.338498	NA	Not DEG
NONMMUG074651.1	0	0	8.00578	0	0	0	2.66859	0	1.3343	3.96548	3.94083	1.00625	0.314294	NA	Not DEG
NONMMUG012147.2	0	0	0	0.882671	0	0.967735	0	0.616802	0.308401	-1.70775	4.03837	-0.42288	0.672382	NA	Not DEG
NONMMUG065431.1	0	2.27067	0	0	6.58363	0	0.75689	2.19454	1.47572	-1.55299	3.88903	-0.399325	0.689653	NA	Not DEG
NONMMUG041709.2	0.953439	0	0	0	0	0	0.317813	0	0.158907	1.10549	4.08047	0.270923	0.78645	NA	Not DEG
NONMMUG096492.1	0	0	0	0	0	13.5483	0	4.51609	2.25805	-4.57791	3.70607	-1.23525	0.216739	NA	Not DEG
NONMMUG063601.1	1.90688	0	11.008	0	0	2.9032	4.30494	0.967735	2.63634	2.16455	2.84716	0.76025	0.447105	NA	Not DEG
NONMMUG015986.2	109.645	130.564	84.0607	121.809	149.543	58.0641	108.09	109.805	108.948	-0.0237982	0.511403	-0.0465352	0.962884	0.999731	Not DEG
NONMMUG032088.2	74.3683	10.218	43.0311	7.06137	55.4906	29.032	42.5391	30.528	36.5336	0.482432	0.906795	0.532019	0.594713	0.999731	Not DEG
NONMMUG021777.2	38.1376	97.6388	409.296	112.099	311.312	130.644	181.691	184.685	183.188	-0.0232808	0.69326	-0.0335816	0.973211	0.999731	Not DEG
NONMMUG057646.1	0	3.40601	1.00072	0	0.940519	0	1.46891	0.313506	0.891208	2.13397	3.96879	0.537687	0.590793	NA	Not DEG
NONMMUG033812.2	36.2307	15.8947	21.0152	34.4242	0	1.93547	24.3802	12.1199	18.25	1.00543	1.32085	0.761197	0.446539	0.999731	Not DEG
NONMMUG043289.2	5.72063	10.218	4.00289	13.2401	10.3457	7.74188	6.64718	10.4426	8.54487	-0.657552	1.24601	-0.527728	0.597688	0.999731	Not DEG
NONMMUG029077.2	68.6476	130.564	73.0528	131.518	65.8363	81.2897	90.7546	92.8814	91.818	-0.0359537	0.530817	-0.0677329	0.945998	0.999731	Not DEG
NONMMUG034839.2	0	27.248	3.00217	0	0	0	10.0834	0	5.0417	5.87833	2.55957	2.29661	0.0216411	NA	Up
NONMMUG012756.2	0	1.13534	0	0	0	0	0.378445	0	0.189223	1.10549	4.08047	0.270923	0.78645	NA	Not DEG
NONMMUG061489.1	0	0	0	0	0	14.516	0	4.83867	2.41934	-4.67746	3.61769	-1.29294	0.196031	NA	Not DEG
NONMMUG074504.1	3.81376	3.40601	4.00289	0	0	1.93547	3.74088	0.645156	2.19302	2.5506	2.69116	0.94777	0.343246	NA	Not DEG
NONMMUG093607.1	0	0	0	0	7.52415	0	0	2.50805	1.25403	-3.73017	3.93957	-0.946846	0.343717	NA	Not DEG
NONMMUG004205.2	15.255	9.08268	5.00361	7.06137	2.82156	0	9.78044	3.29431	6.53738	1.56405	1.6196	0.965704	0.334193	0.999731	Not DEG
NONMMUG072128.1	0	24.9774	9.00651	0	31.9777	12.5805	11.328	14.8527	13.0903	-0.394612	1.61469	-0.244388	0.80693	0.999731	Not DEG
NONMMUG036669.2	9.53439	32.9247	12.0087	8.82671	9.40519	4.83867	18.1559	7.69019	12.9231	1.23385	1.09539	1.1264	0.259994	0.999731	Not DEG
NONMMUG040441.2	293.659	328.112	343.248	342.477	286.858	255.482	321.673	294.939	308.306	0.124809	0.342644	0.364252	0.71567	0.999731	Not DEG
NONMMUG025036.2	307.007	882.156	761.55	700.841	638.613	860.316	650.238	733.257	691.747	-0.173756	0.409679	-0.424128	0.671473	0.999731	Not DEG
NONMMUG086167.1	0	0	0	0	0	1.93547	0	0.645156	0.322578	-1.76457	4.03337	-0.437493	0.661754	NA	Not DEG
NONMMUG065821.1	0	0	0	0	1.88104	0	0	0.627013	0.313506	-1.7287	4.03651	-0.428266	0.668458	NA	Not DEG
NONMMUG092584.1	15.255	2.27067	1.00072	31.7762	2.82156	0	6.17547	11.5326	8.85402	-0.898161	1.72564	-0.52048	0.602729	0.999731	Not DEG
NONMMUG026217.2	0	15.8947	0	0	0	14.516	5.29823	4.83867	5.06845	0.127375	2.63356	0.048366	0.961425	NA	Not DEG
NONMMUG094496.1	21.9291	0	16.0116	17.6534	33.8587	4.83867	12.6469	18.7836	15.7152	-0.565775	1.28774	-0.439355	0.660405	0.999731	Not DEG
NONMMUG042445.2	0	1.13534	0	0	0	0	0.378445	0	0.189223	1.10549	4.08047	0.270923	0.78645	NA	Not DEG
NONMMUG018289.2	0	5.67668	0	0	0	0	1.89223	0	0.946113	3.46031	3.95503	0.874915	0.38162	NA	Not DEG
NONMMUG033477.2	51.4857	112.398	89.0643	86.5018	66.7769	55.1609	84.3161	69.4798	76.898	0.276852	0.541135	0.511614	0.608921	0.999731	Not DEG
NONMMUG073163.1	9.53439	9.08268	12.0087	24.7148	4.7026	3.87094	10.2086	11.0961	10.6523	-0.123331	1.22776	-0.100452	0.919986	0.999731	Not DEG
NONMMUG024761.2	10.4878	5.67668	328.237	46.7816	221.022	234.192	114.801	167.332	141.066	-0.543294	1.59131	-0.341413	NA	NA	Not DEG
NONMMUG087015.1	11.4413	13.624	22.0159	7.94404	45.1449	1.93547	15.6937	18.3415	17.0176	-0.224533	1.15626	-0.194189	0.846028	0.999731	Not DEG
NONMMUG060808.1	0	0	0	0	0	19.3547	0	6.45156	3.22578	-5.09259	3.28401	-1.55072	0.120968	NA	Not DEG
NONMMUG048597.1	2.86032	0	0	3.53069	0	0	0.953439	1.1769	1.06517	-0.298831	3.89425	-0.0767364	0.938833	NA	Not DEG
NONMMUG001415.2	0	0	0	0	5.64312	0	0	1.88104	0.940519	-3.31496	3.95045	-0.839134	0.401394	NA	Not DEG
NONMMUG094737.1	8.58095	0	0	0	11.2862	11.6128	2.86032	7.63301	5.24667	-1.4047	2.25523	-0.622866	0.533372	0.999731	Not DEG
NONMMUG014816.2	4.7672	22.7067	8.00578	33.5415	11.2862	0	11.8266	14.9426	13.3846	-0.344126	1.38873	-0.247799	0.80429	0.999731	Not DEG
NONMMUG014802.2	60.0667	57.9021	116.084	109.451	44.2044	62.9027	78.0175	72.1861	75.1018	0.111765	0.584581	0.191188	0.848378	0.999731	Not DEG
NONMMUG034930.2	14.3016	29.5187	35.0253	52.0776	37.6208	31.9352	26.2819	40.5445	33.4132	-0.627968	0.724008	-0.867349	0.385751	0.999731	Not DEG
NONMMUG063740.1	0	0	0	0	0	0.967735	0	0.322578	0.161289	-0.818059	4.08047	-0.200481	0.841104	NA	Not DEG
NONMMUG062601.1	0	0	0	0	0	0.967735	0	0.322578	0.161289	-0.818059	4.08047	-0.200481	0.841104	NA	Not DEG
NONMMUG066547.1	0	2.27067	0	0	0	0	0.75689	0	0.378445	2.12818	4.02714	0.528459	0.597181	NA	Not DEG
NONMMUG032730.2	0	0	0	0	4.7026	0	0	1.56753	0.783766	-3.05179	3.95914	-0.770821	0.440813	NA	Not DEG
NONMMUG054682.1	10.4878	13.624	2.00145	3.53069	41.3828	7.74188	8.70443	17.5518	13.1281	-1.0141	1.2651	-0.801596	0.422786	0.999731	Not DEG
NONMMUG066644.1	0	0	4.00289	0	0	0	1.3343	0	0.667149	2.96686	3.97454	0.746468	0.455385	NA	Not DEG
NONMMUG017322.2	162.085	122.616	114.082	120.926	104.398	128.709	132.928	118.011	125.469	0.172324	0.428989	0.401698	0.687906	0.999731	Not DEG
NONMMUG083312.1	0	0	0	0	0	2.9032	0	0.967735	0.483867	-2.35177	3.99149	-0.589196	0.55573	NA	Not DEG
NONMMUG069715.1	0	0	0	0.882671	0	0	0	0.294224	0.147112	-0.818059	4.08047	-0.200481	0.841104	NA	Not DEG
NONMMUG072650.1	26.6963	15.8947	29.021	17.6534	26.3345	4.83867	23.8707	16.2755	20.0731	0.553045	0.939671	0.588552	0.556162	0.999731	Not DEG
NONMMUG094046.1	0.953439	15.8947	16.0116	30.8935	20.6914	20.3224	10.9532	23.9691	17.4612	-1.13569	1.07298	-1.05844	0.289853	0.999731	Not DEG
NONMMUG085709.1	6.67407	0	3.00217	0	0	0	3.22541	0	1.61271	4.24043	3.69777	1.14675	0.251483	NA	Not DEG
NONMMUG014170.2	0	0	0	1.76534	0	0	0	0.588448	0.294224	-1.64922	4.04373	-0.407847	0.683386	NA	Not DEG
NONMMUG085688.1	0	3.40601	0	1.76534	0	2.9032	1.13534	1.55618	1.34576	-0.468516	3.61198	-0.129712	0.896794	NA	Not DEG
NONMMUG083088.1	0	0	0	0	0	9.67735	0	3.22578	1.61289	-4.09218	3.93232	-1.04065	0.298036	NA	Not DEG
NONMMUG031784.2	0	0	0	0	0	23.2256	0	7.74188	3.87094	-5.35569	3.10209	-1.72648	0.0842609	NA	Not DEG
NONMMUG084382.1	0	0	0	1.76534	0	0	0	0.588448	0.294224	-1.64922	4.04373	-0.407847	0.683386	NA	Not DEG
NONMMUG090699.1	1.90688	0	0	0	0	0	0.635626	0	0.317813	1.90889	4.04654	0.471733	0.637118	NA	Not DEG
NONMMUG030411.2	0	14.7594	0	18.5361	0	0	4.91979	6.1787	5.54924	-0.33754	2.56905	-0.131387	0.895469	0.999731	Not DEG
NONMMUG039063.2	72.4614	23.842	81.0585	35.3069	19.7509	55.1609	59.1207	36.7395	47.9301	0.688952	0.709034	0.971678	0.331211	0.999731	Not DEG
NONMMUG001495.2	7.62751	48.8194	43.0311	67.9657	22.5725	8.70961	33.1593	33.0826	33.121	-0.000836829	0.933938	-0.000896022	0.999285	0.999731	Not DEG
NONMMUG013928.2	0	0	0	0	3.76208	0	0	1.25403	0.627013	-2.72965	3.97213	-0.687202	0.491955	NA	Not DEG
NONMMUG053720.1	3.81376	0	0	1.76534	1.88104	0	1.27125	1.21546	1.24336	0.0712294	3.71947	0.0191504	0.984721	NA	Not DEG
NONMMUG040569.2	0	0	0	3.53069	0	0	0	1.1769	0.588448	-2.64457	3.97606	-0.665123	0.505972	NA	Not DEG
NONMMUG003239.2	0	0	0	7.94404	0	0	0	2.64801	1.32401	-3.81158	3.93778	-0.967952	0.333068	NA	Not DEG
NONMMUG079443.1	0	0	0	22.0668	0	0	0	7.3556	3.6778	-5.28452	3.14665	-1.67941	0.0930717	NA	Not DEG
NONMMUG071186.1	3.81376	0	0	7.06137	0	0	1.27125	2.35379	1.81252	-0.882963	3.61801	-0.244047	0.807195	NA	Not DEG
NONMMUG049373.1	0	0	0	7.06137	0	0	0	2.35379	1.1769	-3.64196	3.94163	-0.923973	0.3555	NA	Not DEG
NONMMUG007837.2	55.2995	47.6841	85.0614	56.491	78.0631	89.0316	62.6817	74.5285	68.6051	-0.248226	0.545397	-0.455129	0.649017	0.999731	Not DEG
NONMMUG014287.2	0	0	0	0	0	3.87094	0	1.29031	0.645156	-2.76799	3.97043	-0.697153	0.485707	NA	Not DEG
NONMMUG091209.1	0	0	0	0	0	0.967735	0	0.322578	0.161289	-0.818059	4.08047	-0.200481	0.841104	NA	Not DEG
NONMMUG042010.2	293.659	227.067	192.139	313.348	408.185	693.866	237.622	471.8	354.711	-0.98894	0.406435	-2.4332	0.0149659	0.628295	Down
NONMMUG076219.1	45.7651	55.6314	65.047	31.7762	45.1449	57.0963	55.4812	44.6725	50.0768	0.313332	0.597117	0.524741	0.599763	0.999731	Not DEG
NONMMUG004563.2	0	0	0	0	0	3.87094	0	1.29031	0.645156	-2.76799	3.97043	-0.697153	0.485707	NA	Not DEG
NONMMUG043858.2	4.7672	1.13534	6.00434	3.53069	4.7026	6.77414	3.96896	5.00247	4.48572	-0.326403	1.66933	-0.195529	0.844979	NA	Not DEG
NONMMUG061118.1	0	0	4.00289	3.53069	1.88104	0	1.3343	1.80391	1.5691	-0.434065	3.40003	-0.127665	0.898414	NA	Not DEG
NONMMUG026136.2	168.759	353.089	280.202	306.287	463.676	301.933	267.35	357.299	312.324	-0.419268	0.40563	-1.03362	0.301312	0.999731	Not DEG
NONMMUG096360.1	3.81376	1.13534	4.00289	6.1787	7.52415	4.83867	2.98399	6.18051	4.58225	-1.04325	1.64635	-0.633674	0.526294	NA	Not DEG
NONMMUG022473.2	16.2085	18.1654	0	22.9495	21.6319	23.2256	11.4579	22.6023	17.0301	-0.982544	1.1734	-0.837347	0.402398	0.999731	Not DEG
NONMMUG040366.2	37.1841	29.5187	26.0188	18.5361	56.4312	46.4513	30.9072	40.4728	35.69	-0.387231	0.722219	-0.536169	0.591842	0.999731	Not DEG
NONMMUG029054.2	3.81376	27.248	0	12.3574	0	6.77414	10.3539	6.37718	8.36556	0.692575	1.8125	0.382109	0.70238	0.999731	Not DEG
NONMMUG060701.1	7.62751	29.5187	4.00289	1.76534	18.8104	8.70961	13.7164	9.76178	11.7391	0.48728	1.28541	0.379086	0.704624	0.999731	Not DEG
NONMMUG019452.2	0	0	0	3.53069	0	0	0	1.1769	0.588448	-2.64457	3.97606	-0.665123	0.505972	NA	Not DEG
NONMMUG032371.2	0.953439	0	0	0	0.940519	0	0.317813	0.313506	0.31566	0.143722	4.08047	0.0352219	0.971903	NA	Not DEG
NONMMUG090585.1	0	0	0	0	7.52415	0	0	2.50805	1.25403	-3.73017	3.93957	-0.946846	0.343717	NA	Not DEG
NONMMUG016433.2	31.4635	15.8947	64.0463	30.0108	23.513	59.0318	37.1348	37.5185	37.3267	-0.0119242	0.770408	-0.0154778	0.987651	0.999731	Not DEG
NONMMUG058098.1	0	3.40601	0	0	0.940519	0	1.13534	0.313506	0.724421	1.75687	3.98713	0.440635	0.659477	NA	Not DEG
NONMMUG066549.1	0	7.94735	5.00361	0.882671	3.76208	0	4.31699	1.54825	2.93262	1.47498	2.46694	0.597898	0.549908	NA	Not DEG
NONMMUG027133.2	13.3481	6.81201	16.0116	24.7148	22.5725	43.5481	12.0572	30.2784	21.1678	-1.32338	0.874572	-1.51317	0.130237	0.999731	Not DEG
NONMMUG020213.2	29.5566	23.842	55.0398	48.5469	9.40519	59.9995	36.1461	39.3172	37.7317	-0.12026	0.807119	-0.148999	0.881554	0.999731	Not DEG
NONMMUG032459.2	262.196	35.1954	144.104	133.283	47.9665	70.6446	147.165	83.9648	115.565	0.810337	0.662257	1.2236	0.221103	0.999731	Not DEG
NONMMUG036195.2	0	0	0	0	0	0.967735	0	0.322578	0.161289	-0.818059	4.08047	-0.200481	0.841104	NA	Not DEG
NONMMUG022328.2	13.3481	27.248	45.0325	20.3014	19.7509	15.4838	28.5429	18.512	23.5275	0.623522	0.842185	0.740362	0.45908	0.999731	Not DEG
NONMMUG060588.1	0	0	0	7.06137	0	2.9032	0	3.32152	1.66076	-4.13714	3.66403	-1.12912	0.258845	NA	Not DEG
NONMMUG017669.2	29.5566	4.54134	15.0108	5.29603	10.3457	38.7094	16.3696	18.117	17.2433	-0.139746	1.11078	-0.125809	0.899883	0.999731	Not DEG
NONMMUG096436.1	2.86032	0	0	0	0	0	0.953439	0	0.47672	2.48945	4.0008	0.62224	0.533784	NA	Not DEG
NONMMUG038103.2	0	0	0	28.2455	0	0	0	9.41516	4.70758	-5.64056	2.92386	-1.92915	0.0537123	NA	Not DEG
NONMMUG038230.2	68.6476	90.8268	67.0484	129.753	114.743	112.257	75.5076	118.918	97.2127	-0.656748	0.459325	-1.42981	0.152771	0.999731	Not DEG
NONMMUG007440.2	93.437	65.8494	183.132	52.0776	130.732	78.3865	114.14	87.0654	100.603	0.391983	0.569754	0.687987	0.491461	0.999731	Not DEG
NONMMUG006631.2	68.6476	4.54134	12.0087	39.7202	12.2267	64.8382	28.3992	38.9284	33.6638	-0.450401	0.988784	-0.45551	0.648743	0.999731	Not DEG
NONMMUG066899.1	0	0	0	0	0	3.87094	0	1.29031	0.645156	-2.76799	3.97043	-0.697153	0.485707	NA	Not DEG
NONMMUG030288.2	1.90688	0	0	2.64801	0	0	0.635626	0.882671	0.759149	-0.465989	3.96416	-0.117551	0.906424	NA	Not DEG
NONMMUG025826.2	0	12.4887	3.00217	0.882671	0	0	5.16362	0.294224	2.72892	3.95006	2.8584	1.38191	0.166998	NA	Not DEG
NONMMUG020994.2	122.994	300.864	195.141	23.8321	46.0854	20.3224	206.333	30.08	118.206	2.77738	0.541387	5.13012	2.89552e-07	0.00033368	Up
NONMMUG070217.1	0	0	10.0072	0	14.1078	11.6128	3.33574	8.57353	5.95464	-1.35723	2.18216	-0.621966	0.533964	0.999731	Not DEG
NONMMUG030679.2	0	1.13534	0	0	0	0	0.378445	0	0.189223	1.10549	4.08047	0.270923	0.78645	NA	Not DEG
NONMMUG060223.1	0	4.54134	13.0094	0	0	0	5.85025	0	2.92512	5.09615	2.98552	1.70696	0.0878296	NA	Not DEG
NONMMUG044344.3	111.552	148.729	114.082	122.691	125.089	149.031	124.788	132.27	128.529	-0.0847125	0.422778	-0.200371	0.84119	0.999731	Not DEG
NONMMUG018958.2	91.5302	48.8194	63.0455	9.70939	76.1821	44.5158	67.7984	43.4691	55.6337	0.643552	0.73406	0.876701	0.380649	0.999731	Not DEG
NONMMUG080385.1	0	0	0	0	3.76208	0	0	1.25403	0.627013	-2.72965	3.97213	-0.687202	0.491955	NA	Not DEG
NONMMUG047891.1	2.86032	0	3.00217	0	0	6.77414	1.95416	2.25805	2.1061	-0.199336	3.06168	-0.0651066	0.948089	NA	Not DEG
NONMMUG013699.2	65.7873	71.5261	99.0716	158.881	72.42	93.8702	78.795	108.39	93.5927	-0.460632	0.517114	-0.890775	0.37305	0.999731	Not DEG
NONMMUG050980.1	23.836	42.0074	38.0275	20.3014	28.2156	47.419	34.6236	31.9787	33.3011	0.114419	0.72487	0.157848	0.874576	0.999731	Not DEG
NONMMUG073284.1	0	0	0	0	0	3.87094	0	1.29031	0.645156	-2.76799	3.97043	-0.697153	0.485707	NA	Not DEG
NONMMUG024158.2	7.62751	43.1427	14.0101	22.9495	38.5613	12.5805	21.5935	24.6971	23.1453	-0.199738	0.942256	-0.211979	0.832124	0.999731	Not DEG
NONMMUG060781.1	1.90688	3.40601	0	0	0	3.87094	1.77096	1.29031	1.53064	0.45783	3.44076	0.13306	0.894146	NA	Not DEG
NONMMUG019066.2	0	11.3534	2.00145	35.3069	21.6319	24.1934	4.4516	27.0441	15.7478	-2.62692	1.229	-2.13744	0.0325625	0.856729	Down
NONMMUG014603.2	131.575	112.398	98.0708	98.8592	83.7062	131.612	114.015	104.726	109.37	0.123176	0.455519	0.270408	0.786846	0.999731	Not DEG
NONMMUG076559.1	0	0	7.00506	2.64801	0	0	2.33502	0.882671	1.60885	1.39795	3.78221	0.369611	0.711672	NA	Not DEG
NONMMUG055941.1	26.6963	4.54134	4.00289	0	37.6208	36.7739	11.7468	24.7982	18.2725	-1.07248	1.34206	-0.799129	0.424215	0.999731	Not DEG
NONMMUG053437.1	0	0	1.00072	0	0	0	0.333574	0	0.166787	1.10549	4.08047	0.270923	0.78645	NA	Not DEG
NONMMUG015818.3	102.971	37.4661	86.0622	10.5921	18.8104	23.2256	75.4999	17.5427	46.5213	2.1097	0.688436	3.06448	0.00218046	0.272798	Up
NONMMUG036833.2	0	0	0	0	0	3.87094	0	1.29031	0.645156	-2.76799	3.97043	-0.697153	0.485707	NA	Not DEG
NONMMUG077534.1	0	0	38.0275	16.7708	0	0	12.6758	5.59025	9.13304	1.17875	2.27954	0.517099	0.605087	0.999731	Not DEG
NONMMUG055924.1	0	0	0	0	3.76208	0	0	1.25403	0.627013	-2.72965	3.97213	-0.687202	0.491955	NA	Not DEG
NONMMUG034313.2	29.5566	0	6.00434	32.6588	13.1673	0	11.8536	15.2754	13.5645	-0.363037	1.60816	-0.225747	0.821398	0.999731	Not DEG
NONMMUG014386.2	23.836	0	58.0419	12.3574	26.3345	22.2579	27.2926	20.3166	23.8046	0.428806	1.15943	0.369843	0.7115	0.999731	Not DEG
NONMMUG015445.2	4283.8	1066.08	1069.77	565.792	1728.67	859.348	2139.88	1051.27	1595.58	1.02557	0.535192	1.91627	0.0553306	0.999731	Not DEG
NONMMUG090101.1	11.4413	4.54134	9.00651	41.4856	21.6319	0	8.32971	21.0392	14.6844	-1.33485	1.3372	-0.998248	0.318159	0.999731	Not DEG
NONMMUG018525.2	3.81376	3.40601	9.00651	10.5921	11.2862	12.5805	5.40876	11.4863	8.44752	-1.08368	1.2613	-0.859174	0.390245	0.999731	Not DEG
NONMMUG089630.1	39.091	10.218	23.0166	68.8484	32.9182	31.9352	24.1085	44.5673	34.3379	-0.88269	0.777366	-1.13549	0.256171	0.999731	Not DEG
NONMMUG040253.2	0	6.81201	10.0072	0	0	18.387	5.60641	6.12899	5.8677	-0.127917	2.23927	-0.0571245	0.954446	0.999731	Not DEG
NONMMUG089591.1	109.645	191.872	152.11	96.2112	179.639	138.386	151.209	138.079	144.644	0.130416	0.454676	0.286832	0.774241	0.999731	Not DEG
NONMMUG081713.1	19.0688	22.7067	35.0253	23.8321	39.5018	24.1934	25.6003	29.1758	27.388	-0.188243	0.763345	-0.246603	0.805216	0.999731	Not DEG
NONMMUG011851.2	3.81376	4.54134	3.00217	4.41336	3.76208	4.83867	3.78576	4.33804	4.0619	-0.197963	1.67757	-0.118006	0.906063	NA	Not DEG
NONMMUG090282.1	6.67407	0	7.00506	15.8881	18.8104	3.87094	4.55971	12.8565	8.70809	-1.48638	1.47176	-1.00993	0.312527	0.999731	Not DEG
NONMMUG030651.2	72.4614	79.4735	87.0629	106.803	76.1821	113.225	79.6659	98.7367	89.2013	-0.309792	0.476988	-0.649475	0.516032	0.999731	Not DEG
NONMMUG068126.1	3.81376	0	8.00578	0	0	0	3.93985	0	1.96992	4.52818	3.42375	1.32258	0.185975	NA	Not DEG
NONMMUG026790.2	0	30.6541	31.0224	37.0722	34.7992	0	20.5588	23.9571	22.258	-0.223291	1.4306	-0.156082	0.875968	0.999731	Not DEG
NONMMUG015570.2	46.7185	13.624	23.0166	3.53069	15.9888	10.6451	27.7864	10.0549	18.9206	1.47162	0.989525	1.4872	0.136962	0.999731	Not DEG
NONMMUG022215.2	64.8339	102.18	82.0593	109.451	90.2898	73.5478	83.0244	91.0963	87.0604	-0.135736	0.49198	-0.275898	0.782627	0.999731	Not DEG
NONMMUG003824.2	0	0	0	0	0	13.5483	0	4.51609	2.25805	-4.57791	3.70607	-1.23525	0.216739	NA	Not DEG
NONMMUG044419.2	0	0	0	0	0	19.3547	0	6.45156	3.22578	-5.09259	3.28401	-1.55072	0.120968	NA	Not DEG
NONMMUG058352.1	0	0	0	0	0	6.77414	0	2.25805	1.12902	-3.57695	3.94323	-0.907111	0.364348	NA	Not DEG
NONMMUG078257.1	9.53439	0	4.00289	0.882671	0	0	4.51243	0.294224	2.40333	3.76372	2.95199	1.27498	0.202317	NA	Not DEG
NONMMUG006242.2	847.607	798.141	715.517	802.348	752.415	768.381	787.088	774.382	780.735	0.0234754	0.291893	0.0804247	0.9359	0.999731	Not DEG
NONMMUG091554.1	0	0	0	0	0	7.74188	0	2.58063	1.29031	-3.76987	3.93869	-0.957138	0.338498	NA	Not DEG
NONMMUG076215.1	0	0	11.008	0	0	0	3.66932	0	1.83466	4.4245	3.93158	1.12538	0.26043	NA	Not DEG
NONMMUG040643.2	4.7672	0	0	5.29603	3.76208	0	1.58907	3.01937	2.30422	-0.9172	2.94153	-0.311811	0.755184	NA	Not DEG
NONMMUG059329.1	0	0	0	0	0	7.74188	0	2.58063	1.29031	-3.76987	3.93869	-0.957138	0.338498	NA	Not DEG
NONMMUG054101.1	0	0	0	6.1787	0	0	0	2.05957	1.02978	-3.4497	3.94658	-0.8741	0.382064	NA	Not DEG
NONMMUG056448.1	0	0	0	1.76534	0	11.6128	0	4.45939	2.22969	-4.55981	3.31501	-1.3755	0.168975	NA	Not DEG
NONMMUG047444.1	10.4878	7.94735	0	8.82671	5.64312	17.4192	6.14506	10.6297	8.38737	-0.790064	1.48967	-0.530361	0.595861	0.999731	Not DEG
NONMMUG062873.1	880.978	1013.85	870.629	970.056	857.753	1014.19	921.82	947.332	934.576	-0.0395118	0.291035	-0.135763	0.892009	0.999731	Not DEG
NONMMUG020756.2	4.7672	0	2.00145	7.06137	2.82156	24.1934	2.25621	11.3588	6.80749	-2.31272	1.66455	-1.38939	0.164713	0.999731	Not DEG
NONMMUG083177.1	12.3947	0	18.013	4.41336	0	0	10.1359	1.47112	5.80351	2.77394	2.16187	1.28312	0.199449	0.999731	Not DEG
NONMMUG078654.1	0	0	1.00072	0	0	0	0.333574	0	0.166787	1.10549	4.08047	0.270923	0.78645	NA	Not DEG
NONMMUG039742.2	30.5101	37.4661	14.0101	19.4188	23.513	36.7739	27.3287	26.5686	26.9486	0.0400399	0.795744	0.0503176	0.959869	0.999731	Not DEG
NONMMUG047088.1	16.2085	19.3007	23.0166	12.3574	32.9182	9.67735	19.5086	18.3176	18.9131	0.0908732	0.926414	0.0980914	0.92186	0.999731	Not DEG
NONMMUG042949.2	55.2995	38.6014	61.0441	98.8592	67.7174	35.8062	51.6483	67.4609	59.5546	-0.38512	0.60729	-0.634161	0.525976	0.999731	Not DEG
NONMMUG060979.1	0	0	0	0	0	8.70961	0	2.9032	1.4516	-3.94001	3.93515	-1.00123	0.316713	NA	Not DEG
NONMMUG009981.3	0	0	15.0108	3.53069	0	12.5805	5.00361	5.37041	5.18701	-0.098603	2.3151	-0.0425912	0.966027	0.999731	Not DEG
NONMMUG040089.2	85.8095	140.782	78.0564	52.0776	64.8958	99.6767	101.549	72.2167	86.8829	0.491239	0.527102	0.931962	0.351356	0.999731	Not DEG
NONMMUG090129.1	57.2063	27.248	33.0239	40.6029	32.9182	38.7094	39.1594	37.4101	38.2848	0.0681443	0.669227	0.101825	0.918895	0.999731	Not DEG
NONMMUG008393.2	151.597	143.052	144.104	133.283	81.8252	173.224	146.251	129.444	137.848	0.176412	0.448869	0.393015	0.694308	0.999731	Not DEG
NONMMUG009627.2	0	0	31.0224	0	13.1673	27.0966	10.3408	13.4213	11.881	-0.37343	1.89688	-0.196865	0.843933	0.999731	Not DEG
NONMMUG026923.2	0	5.67668	3.00217	0	0	0	2.89295	0	1.44647	4.07747	3.86407	1.05523	0.291322	NA	Not DEG
NONMMUG095879.1	24.7894	9.08268	26.0188	8.82671	21.6319	19.3547	19.9636	16.6044	18.284	0.270413	0.942724	0.286842	0.774234	0.999731	Not DEG
NONMMUG062289.1	0	0	0	2.64801	0	0.967735	0	1.20525	0.602625	-2.67629	3.97457	-0.673352	0.500723	NA	Not DEG
NONMMUG013829.2	1.90688	21.5714	10.0072	0	4.7026	3.87094	11.1618	2.85784	7.00984	1.96723	1.64805	1.19367	0.232605	0.999731	Not DEG
NONMMUG062308.1	12.3947	2.27067	0	2.64801	3.76208	3.87094	4.88846	3.42701	4.15773	0.518463	1.95724	0.264895	0.791091	NA	Not DEG
NONMMUG074745.1	66.7407	54.4961	62.0448	12.3574	55.4906	54.1931	61.0939	40.6804	50.8871	0.588839	0.687265	0.856785	0.391564	0.999731	Not DEG
NONMMUG013597.2	2.86032	4.54134	0	1.76534	2.82156	7.74188	2.46722	4.10959	3.28841	-0.740199	2.09723	-0.35294	0.724133	NA	Not DEG
NONMMUG021351.2	0	0	0	2.64801	15.0483	0	0	5.89877	2.94939	-4.96453	2.9988	-1.6555	0.0978223	NA	Not DEG
NONMMUG047545.1	0	2.27067	0	0	0	29.032	0.75689	9.67735	5.21712	-3.71152	2.64021	-1.40577	0.159793	0.999731	Not DEG
NONMMUG081404.1	0	0	2.00145	0	0	0	0.667149	0	0.333574	1.9693	4.04091	0.487342	0.626016	NA	Not DEG
NONMMUG013433.2	0	0	14.0101	0	0	0	4.67004	0	2.33502	4.77235	3.65243	1.30662	0.191341	NA	Not DEG
NONMMUG070382.1	0	0	0	0	0	2.9032	0	0.967735	0.483867	-2.35177	3.99149	-0.589196	0.55573	NA	Not DEG
NONMMUG093244.1	2.86032	0	0	13.2401	0	0	0.953439	4.41336	2.6834	-2.19809	3.1713	-0.693119	0.488235	NA	Not DEG
NONMMUG022908.2	79.1354	161.218	108.078	87.3845	141.078	97.7412	116.144	108.735	112.439	0.0936985	0.487289	0.192285	0.847519	0.999731	Not DEG
NONMMUG006048.2	0	4.54134	4.00289	8.82671	1.88104	0	2.84808	3.56925	3.20866	-0.334613	2.37809	-0.140706	0.888102	NA	Not DEG
NONMMUG030255.2	0	0	0	0	0	9.67735	0	3.22578	1.61289	-4.09218	3.93232	-1.04065	0.298036	NA	Not DEG
NONMMUG040503.2	40.0444	38.6014	57.0412	46.7816	51.7286	32.903	45.229	43.8044	44.5167	0.0462912	0.619602	0.0747111	0.940445	0.999731	Not DEG
NONMMUG062393.1	6.67407	0	0	0	0	0	2.22469	0	1.11235	3.70621	3.9475	0.938875	0.347795	NA	Not DEG
NONMMUG014062.2	139.202	146.458	86.0622	103.273	66.7769	86.1284	123.908	85.3926	104.65	0.536237	0.47812	1.12155	0.262053	0.999731	Not DEG
NONMMUG000469.2	336.564	667.577	507.366	547.256	546.442	569.996	503.836	554.565	529.2	-0.13901	0.354948	-0.391635	0.695328	0.999731	Not DEG
NONMMUG049634.1	0	0	0	0	0	3.87094	0	1.29031	0.645156	-2.76799	3.97043	-0.697153	0.485707	NA	Not DEG
NONMMUG032171.2	252.661	183.924	226.163	201.249	243.594	235.159	220.916	226.668	223.792	-0.0362635	0.368067	-0.0985242	0.921516	0.999731	Not DEG
NONMMUG003218.2	0	0	1.00072	0	0	0	0.333574	0	0.166787	1.10549	4.08047	0.270923	0.78645	NA	Not DEG
NONMMUG025901.2	52.4392	27.248	55.0398	82.9711	50.788	29.032	44.909	54.2637	49.5864	-0.272173	0.661654	-0.411353	0.680814	0.999731	Not DEG
NONMMUG018736.2	90.5767	197.548	131.095	121.809	131.673	124.838	139.74	126.106	132.923	0.146494	0.457121	0.320471	0.748611	0.999731	Not DEG
NONMMUG011029.2	31.4635	38.6014	32.0231	21.1841	32.9182	39.6771	34.0293	31.2598	32.6446	0.122745	0.6985	0.175726	0.860509	0.999731	Not DEG
NONMMUG054370.1	4.7672	0	0	16.7708	0	0	1.58907	5.59025	3.58966	-1.80584	2.88314	-0.626345	0.531089	NA	Not DEG
NONMMUG060554.1	0	0	3.00217	2.64801	2.82156	30.9675	1.00072	12.1457	6.57321	-3.58766	1.95647	-1.83374	0.0666924	0.999731	Not DEG
NONMMUG011168.3	5.72063	26.1127	5.00361	49.4296	6.58363	12.5805	12.279	22.8646	17.5718	-0.906205	1.12705	-0.804054	0.421366	0.999731	Not DEG
NONMMUG028287.2	0	0	0	0	0	2.9032	0	0.967735	0.483867	-2.35177	3.99149	-0.589196	0.55573	NA	Not DEG
NONMMUG022134.2	23.836	15.8947	16.0116	15.0054	5.64312	25.1611	18.5807	15.2699	16.9253	0.285212	0.975908	0.292253	0.770094	0.999731	Not DEG
NONMMUG028817.2	0	1.13534	2.00145	0	2.82156	0.967735	1.04559	1.2631	1.15435	-0.273435	3.47901	-0.0785957	0.937354	NA	Not DEG
NONMMUG093468.1	2.86032	13.624	42.0304	36.1895	19.7509	13.5483	19.5049	23.1629	21.3339	-0.249173	1.03473	-0.240811	0.809702	0.999731	Not DEG
NONMMUG075941.1	23.836	9.08268	43.0311	2.64801	14.1078	3.87094	25.3166	6.87558	16.0961	1.88424	1.10403	1.70669	0.0878798	0.999731	Not DEG
NONMMUG041108.2	40.9979	219.12	16.0116	117.395	77.1226	164.515	92.0431	119.678	105.86	-0.381363	0.752858	-0.506553	0.612468	0.999731	Not DEG
NONMMUG017956.2	23.836	10.218	18.013	18.5361	15.0483	6.77414	17.3557	13.4528	15.4043	0.368582	0.993493	0.370996	0.710641	0.999731	Not DEG
NONMMUG053935.1	0	0	8.00578	0	0	0	2.66859	0	1.3343	3.96548	3.94083	1.00625	0.314294	NA	Not DEG
NONMMUG071021.1	0	0	0	0	0	7.74188	0	2.58063	1.29031	-3.76987	3.93869	-0.957138	0.338498	NA	Not DEG
NONMMUG014258.2	0	0	0	0	3.76208	0	0	1.25403	0.627013	-2.72965	3.97213	-0.687202	0.491955	NA	Not DEG
NONMMUG022113.2	14.3016	5.67668	8.00578	6.1787	0	3.87094	9.32802	3.34988	6.33895	1.47642	1.61987	0.911441	0.362063	0.999731	Not DEG
NONMMUG058976.1	0	2.27067	3.00217	0	8.46467	0	1.75761	2.82156	2.28959	-0.685645	2.99526	-0.22891	0.818939	NA	Not DEG
NONMMUG063221.2	96.2974	77.2028	55.0398	74.1444	150.483	93.8702	76.18	106.166	91.1729	-0.478153	0.51968	-0.920091	0.357525	0.999731	Not DEG
NONMMUG021842.2	0	0	0	0	2.82156	0	0	0.940519	0.47026	-2.31429	3.9937	-0.579485	0.562262	NA	Not DEG
NONMMUG053251.1	0	0	3.00217	0	0	0	1.00072	0	0.500361	2.55269	3.99681	0.638681	0.52303	NA	Not DEG
NONMMUG078289.2	0	64.7141	0	66.2004	0	0	21.5714	22.0668	21.8191	-0.0337397	3.73332	-0.00903745	NA	NA	Not DEG
NONMMUG040983.3	0	0	0	0	0	14.516	0	4.83867	2.41934	-4.67746	3.61769	-1.29294	0.196031	NA	Not DEG
NONMMUG034243.2	29.5566	10.218	28.0202	17.6534	34.7992	17.4192	22.5983	23.2906	22.9445	-0.0397912	0.862273	-0.0461468	0.963193	0.999731	Not DEG
NONMMUG090853.1	41.9513	12.4887	62.0448	10.5921	25.394	34.8384	38.8283	23.6082	31.2182	0.721899	0.843531	0.855806	0.392105	0.999731	Not DEG
NONMMUG080641.1	0	11.3534	5.00361	4.41336	3.76208	3.87094	5.45232	4.01546	4.73389	0.433826	1.8297	0.237102	0.812578	NA	Not DEG
NONMMUG049769.1	0	0	3.00217	0	0	0	1.00072	0	0.500361	2.55269	3.99681	0.638681	0.52303	NA	Not DEG
NONMMUG041556.2	0	0	0	0	8.46467	0	0	2.82156	1.41078	-3.90015	3.93594	-0.990907	0.321731	NA	Not DEG
NONMMUG003726.2	84.8561	86.2855	44.0318	58.2563	137.316	200.321	71.7245	131.964	101.844	-0.879398	0.570828	-1.54057	0.123422	0.999731	Not DEG
NONMMUG017875.2	72.4614	59.0374	88.0636	82.9711	76.1821	82.2574	73.1875	80.4702	76.8288	-0.135967	0.496757	-0.273709	0.784309	0.999731	Not DEG
NONMMUG045284.2	0	13.624	0	0	7.52415	0	4.54134	2.50805	3.5247	0.851928	2.90926	0.292833	0.76965	NA	Not DEG
NONMMUG041463.2	9.53439	6.81201	30.0217	22.0668	25.394	13.5483	15.456	20.3364	17.8962	-0.393881	0.980126	-0.401868	0.687781	0.999731	Not DEG
NONMMUG007890.2	0	0	8.00578	0	0	0	2.66859	0	1.3343	3.96548	3.94083	1.00625	0.314294	NA	Not DEG
NONMMUG009501.2	207.85	208.902	242.175	240.969	206.914	229.353	219.642	225.746	222.694	-0.039528	0.358678	-0.110204	0.912247	0.999731	Not DEG
NONMMUG013718.2	0	6.81201	12.0087	5.29603	0	25.1611	6.27356	10.1524	8.21297	-0.694965	1.8049	-0.385043	0.700205	0.999731	Not DEG
NONMMUG072323.1	0	0	5.00361	0	0	0	1.66787	0	0.833936	3.28825	3.9611	0.830137	0.406462	NA	Not DEG
NONMMUG081833.1	0	0	0	0	0	3.87094	0	1.29031	0.645156	-2.76799	3.97043	-0.697153	0.485707	NA	Not DEG
NONMMUG046052.2	0	2.27067	0	0.882671	0.940519	3.87094	0.75689	1.89804	1.32747	-1.34877	3.31627	-0.406711	0.68422	NA	Not DEG
NONMMUG041360.2	424.28	396.232	493.356	359.247	458.033	443.222	437.956	420.168	429.062	0.0601332	0.32568	0.184639	0.853512	0.999731	Not DEG
NONMMUG073513.1	0	12.4887	3.00217	0	0	0	5.16362	0	2.58181	4.91269	3.13025	1.56942	0.116549	NA	Not DEG
NONMMUG093056.1	6.67407	15.8947	33.0239	12.3574	41.3828	20.3224	18.5309	24.6876	21.6092	-0.413568	0.949132	-0.435733	0.66303	0.999731	Not DEG
NONMMUG078992.1	0	7.94735	0	0	0	1.93547	2.64912	0.645156	1.64714	2.03964	3.77342	0.540529	0.588833	NA	Not DEG
NONMMUG006193.2	107.739	56.7668	12.0087	10.5921	12.2267	311.611	58.838	111.476	85.1572	-0.920831	1.01094	-0.910864	0.362367	0.999731	Not DEG
NONMMUG020863.2	4.7672	7.94735	7.00506	14.1227	4.7026	1.93547	6.5732	6.92027	6.74674	-0.0799553	1.44046	-0.0555067	0.955735	0.999731	Not DEG
NONMMUG010433.2	12.3947	19.3007	11.008	13.2401	18.8104	44.5158	14.2345	25.5221	19.8783	-0.843723	0.918705	-0.918383	0.358418	0.999731	Not DEG
NONMMUG049460.1	0	3.40601	4.00289	0	4.7026	0	2.46963	1.56753	2.01858	0.654343	3.09952	0.211112	0.8328	NA	Not DEG
NONMMUG077078.1	0	0	11.008	0	0	0	3.66932	0	1.83466	4.4245	3.93158	1.12538	0.26043	NA	Not DEG
NONMMUG030027.2	99.1577	146.458	111.08	71.4964	134.494	44.5158	118.899	83.5021	101.2	0.508968	0.537885	0.946241	0.344026	0.999731	Not DEG
NONMMUG078991.1	0	2.27067	0	0	0	0	0.75689	0	0.378445	2.12818	4.02714	0.528459	0.597181	NA	Not DEG
NONMMUG044588.2	0	20.436	0	0	0	0	6.81201	0	3.40601	5.31257	3.22193	1.64888	0.0991727	NA	Not DEG
NONMMUG001975.2	0	0	29.021	0	0	13.5483	9.67365	4.51609	7.09487	1.10285	2.41264	0.457114	0.647589	0.999731	Not DEG
NONMMUG013586.2	712.219	800.411	603.436	579.032	637.672	718.059	705.355	644.921	675.138	0.129151	0.309416	0.417402	0.676385	0.999731	Not DEG
NONMMUG041532.2	0	0	0	0	0	7.74188	0	2.58063	1.29031	-3.76987	3.93869	-0.957138	0.338498	NA	Not DEG
NONMMUG011055.2	76.2751	89.6915	28.0202	45.8989	76.1821	68.7091	64.6623	63.5967	64.1295	0.0233019	0.61487	0.0378972	0.96977	0.999731	Not DEG
NONMMUG033134.2	88.6698	65.8494	82.0593	80.3231	72.42	53.2254	78.8595	68.6562	73.7578	0.200212	0.51129	0.391582	0.695367	0.999731	Not DEG
NONMMUG019028.2	46.7185	113.534	101.073	75.0271	52.6691	99.6767	87.1084	75.7909	81.4496	0.199497	0.557775	0.357665	0.720594	0.999731	Not DEG
NONMMUG065159.1	0	0	0	4.41336	0	0	0	1.47112	0.73556	-2.96548	3.96234	-0.748416	0.454209	NA	Not DEG
NONMMUG032314.2	0	0	0	0	0	2.9032	0	0.967735	0.483867	-2.35177	3.99149	-0.589196	0.55573	NA	Not DEG
NONMMUG063368.1	4.7672	0	0	19.4188	0	10.6451	1.58907	10.0213	5.80517	-2.63912	2.17414	-1.21387	0.224798	0.999731	Not DEG
NONMMUG004572.2	0	0	0	0	0	1.93547	0	0.645156	0.322578	-1.76457	4.03337	-0.437493	0.661754	NA	Not DEG
NONMMUG013219.2	27.6497	30.6541	36.026	37.0722	15.0483	23.2256	31.4433	25.1154	28.2793	0.322734	0.759309	0.425037	0.67081	0.999731	Not DEG
NONMMUG052883.1	1.90688	2.27067	2.00145	12.3574	0	0	2.05966	4.11913	3.0894	-1.00474	2.4631	-0.407917	0.683335	NA	Not DEG
NONMMUG080086.1	4.7672	4.54134	6.00434	9.70939	7.52415	5.80641	5.10429	7.67998	6.39214	-0.589649	1.38591	-0.425461	0.670501	0.999731	Not DEG
NONMMUG055497.1	1.90688	6.81201	0	0	5.64312	7.74188	2.9063	4.46166	3.68398	-0.624747	2.26493	-0.275835	0.782675	NA	Not DEG
NONMMUG054993.1	0	0	0	0	0	31.9352	0	10.6451	5.32254	-5.81524	2.83035	-2.0546	0.0399174	0.917606	Down
NONMMUG003228.2	0	2.27067	0	0	0.940519	0	0.75689	0.313506	0.535198	1.16641	4.02714	0.289636	0.772094	NA	Not DEG
NONMMUG046351.2	0	0	0	0	0	0.967735	0	0.322578	0.161289	-0.818059	4.08047	-0.200481	0.841104	NA	Not DEG
NONMMUG034971.2	22.8825	0	0	13.2401	0	14.516	7.62751	9.25203	8.43977	-0.273874	2.02329	-0.13536	0.892327	0.999731	Not DEG
NONMMUG078568.1	0	2.27067	3.00217	0	0	0	1.75761	0	0.878807	3.35927	3.95851	0.848622	0.396092	NA	Not DEG
NONMMUG000064.2	0	0	0	0.882671	0	9.67735	0	3.52001	1.76	-4.21832	3.64224	-1.15817	0.246796	NA	Not DEG
NONMMUG091944.1	114.413	98.7742	111.08	146.523	131.673	101.612	108.089	126.603	117.346	-0.228031	0.435107	-0.52408	0.600223	0.999731	Not DEG
NONMMUG048600.1	0	0	3.00217	5.29603	0	3.87094	1.00072	3.05566	2.02819	-1.60563	3.08472	-0.520511	0.602707	NA	Not DEG
NONMMUG078055.1	0	4.54134	0	1.76534	0	2.9032	1.51378	1.55618	1.53498	-0.0511142	3.43886	-0.0148637	0.988141	NA	Not DEG
NONMMUG011374.2	0	0	4.00289	0	0	0	1.3343	0	0.667149	2.96686	3.97454	0.746468	0.455385	NA	Not DEG
NONMMUG034665.2	0	0	8.00578	0	0	0	2.66859	0	1.3343	3.96548	3.94083	1.00625	0.314294	NA	Not DEG
NONMMUG018303.2	3.81376	11.3534	19.0137	19.4188	41.3828	19.3547	11.3936	26.7188	19.0562	-1.23128	0.969505	-1.27	0.204083	0.999731	Not DEG
NONMMUG089373.1	8.58095	10.218	10.0072	10.5921	1.88104	10.6451	9.60207	7.70606	8.65406	0.316176	1.28265	0.246502	0.805294	0.999731	Not DEG
NONMMUG064833.1	0	0	0	1.76534	10.3457	7.74188	0	6.61764	3.30882	-5.1296	2.54443	-2.01601	0.0437992	NA	Down
NONMMUG092956.1	11.4413	9.08268	0	7.94404	2.82156	0	6.84132	3.58853	5.21493	0.926213	2.01336	0.460033	0.645492	0.999731	Not DEG
NONMMUG004033.2	13.3481	26.1127	3.00217	0	3.76208	0	14.1543	1.25403	7.70418	3.49925	1.7698	1.97721	0.0480184	0.958279	Up
NONMMUG053840.1	0	5.67668	0	0	0	0	1.89223	0	0.946113	3.46031	3.95503	0.874915	0.38162	NA	Not DEG
NONMMUG000637.2	63.8804	12.4887	433.313	30.8935	101.576	93.8702	169.894	75.4466	122.67	1.17211	0.854747	1.3713	0.170282	0.999731	Not DEG
NONMMUG048382.1	0	0	3.00217	0	0	0	1.00072	0	0.500361	2.55269	3.99681	0.638681	0.52303	NA	Not DEG
NONMMUG023488.2	0	0	0	0	0	5.80641	0	1.93547	0.967735	-3.35419	3.94929	-0.849316	0.395705	NA	Not DEG
NONMMUG029854.2	7.62751	6.81201	0	0	0	0	4.81317	0	2.40659	4.81446	3.17861	1.51464	0.129863	NA	Not DEG
NONMMUG059415.1	3.81376	0	0	9.70939	6.58363	0	1.27125	5.43101	3.35113	-2.07973	2.58101	-0.80578	0.42037	NA	Not DEG
NONMMUG024115.2	0	6.81201	0	0	6.58363	0	2.27067	2.19454	2.23261	0.041805	3.36926	0.0124078	0.9901	NA	Not DEG
NONMMUG020568.2	2.86032	0	0	0	1.88104	0	0.953439	0.627013	0.790226	0.61704	3.95594	0.155978	0.87605	NA	Not DEG
NONMMUG000815.2	20.0222	39.7367	71.0513	43.2509	36.6802	36.7739	43.6034	38.9017	41.2526	0.16389	0.696345	0.235358	0.813931	0.999731	Not DEG
NONMMUG078562.1	0	28.3834	31.0224	5.29603	15.9888	0	19.8019	7.09495	13.4484	1.47886	1.57964	0.936198	0.349171	0.999731	Not DEG
NONMMUG090221.1	0	0	0	0	0	10.6451	0	3.54836	1.77418	-4.22983	3.93	-1.07629	0.281796	NA	Not DEG
NONMMUG031991.2	30.5101	29.5187	23.0166	78.5578	26.3345	15.4838	27.6818	40.1253	33.9036	-0.537628	0.799229	-0.672683	0.501149	0.999731	Not DEG
NONMMUG039316.2	11.4413	14.7594	6.00434	5.29603	5.64312	3.87094	10.735	4.93669	7.83584	1.1181	1.29317	0.864619	0.387248	0.999731	Not DEG
NONMMUG065521.1	0	3.40601	10.0072	0.882671	2.82156	1.93547	4.47108	1.8799	3.17549	1.25172	2.18639	0.572506	0.566979	NA	Not DEG
NONMMUG025650.2	0	0	0	0	0	3.87094	0	1.29031	0.645156	-2.76799	3.97043	-0.697153	0.485707	NA	Not DEG
NONMMUG088444.1	10.4878	18.1654	16.0116	21.1841	24.4535	20.3224	14.8883	21.9867	18.4375	-0.564928	0.877683	-0.643659	0.519797	0.999731	Not DEG
NONMMUG020255.2	58.1598	24.9774	32.0231	31.7762	8.46467	26.1288	38.3868	22.1232	30.255	0.796047	0.808099	0.985085	0.324582	0.999731	Not DEG
NONMMUG096510.1	28.6032	20.436	9.00651	14.1227	14.1078	41.6126	19.3486	23.281	21.3148	-0.264816	0.924465	-0.286453	0.774531	0.999731	Not DEG
NONMMUG011618.2	4.7672	0	10.0072	15.0054	10.3457	0	4.92481	8.45038	6.68759	-0.775554	1.85743	-0.417541	0.676283	0.999731	Not DEG
NONMMUG046948.1	30.5101	21.5714	26.0188	30.8935	31.9777	22.2579	26.0334	28.3763	27.2049	-0.123363	0.742142	-0.166225	0.86798	0.999731	Not DEG
NONMMUG007335.2	22.8825	28.3834	80.0578	21.1841	38.5613	14.516	43.7746	24.7538	34.2642	0.822922	0.796535	1.03313	0.301544	0.999731	Not DEG
NONMMUG084937.1	1.90688	0	0	0	0	1.93547	0.635626	0.645156	0.640391	0.000600929	3.99904	0.000150268	0.99988	NA	Not DEG
NONMMUG009286.2	0	0	0	0	0	2.9032	0	0.967735	0.483867	-2.35177	3.99149	-0.589196	0.55573	NA	Not DEG
NONMMUG081906.1	0	0	0	0	0	8.70961	0	2.9032	1.4516	-3.94001	3.93515	-1.00123	0.316713	NA	Not DEG
NONMMUG070561.1	0	0	0	0.882671	5.64312	3.87094	0	3.46557	1.73279	-4.19632	3.23756	-1.29613	0.194929	NA	Not DEG
NONMMUG082596.1	0	0	0	0	9.40519	3.87094	0	4.42538	2.21269	-4.54912	3.29248	-1.38167	0.167073	NA	Not DEG
NONMMUG040216.2	0.953439	1.13534	0	3.53069	18.8104	2.9032	0.696258	8.41476	4.55551	-3.60698	2.03965	-1.76843	0.0769893	NA	Not DEG
NONMMUG005987.2	2.86032	14.7594	6.00434	3.53069	9.40519	3.87094	7.87467	5.60227	6.73847	0.485819	1.43895	0.33762	0.73565	0.999731	Not DEG
NONMMUG077929.1	23.836	0	0	9.70939	27.2751	6.77414	7.94533	14.5862	11.2658	-0.869393	1.64542	-0.528371	0.597242	0.999731	Not DEG
NONMMUG013396.2	3.81376	0	18.013	0	0	36.7739	7.27559	12.258	9.76678	-0.748584	2.01999	-0.370588	0.710944	0.999731	Not DEG
NONMMUG066807.1	0	0	2.00145	0	0	0	0.667149	0	0.333574	1.9693	4.04091	0.487342	0.626016	NA	Not DEG
NONMMUG020009.2	7.62751	0	0	0	0	7.74188	2.5425	2.58063	2.56156	-0.012853	3.21155	-0.00400212	0.996807	NA	Not DEG
NONMMUG040584.2	0	0	0	9.70939	0.940519	46.4513	0	19.0337	9.51686	-6.6538	2.00614	-3.31671	0.000910826	0.178704	Down
NONMMUG063103.1	7.62751	12.4887	3.00217	8.82671	6.58363	12.5805	7.70612	9.3303	8.51821	-0.279761	1.27279	-0.219801	0.826026	0.999731	Not DEG
NONMMUG034586.2	0	10.218	0	13.2401	2.82156	0	3.40601	5.35388	4.37994	-0.6653	2.43153	-0.273614	0.784381	NA	Not DEG
NONMMUG042760.2	46.7185	32.9247	29.021	63.5523	43.2639	17.4192	36.2214	41.4118	38.8166	-0.193742	0.72149	-0.268531	0.78829	0.999731	Not DEG
NONMMUG084844.1	0.953439	0	0	0	0	0	0.317813	0	0.158907	1.10549	4.08047	0.270923	0.78645	NA	Not DEG
NONMMUG091155.1	0	6.81201	2.00145	9.70939	1.88104	7.74188	2.93782	6.4441	4.69096	-1.14811	1.87016	-0.613911	0.539274	NA	Not DEG
NONMMUG034407.2	571.11	1197.78	912.659	664.652	879.385	831.284	893.849	791.774	842.811	0.174647	0.3574	0.48866	0.625083	0.999731	Not DEG
NONMMUG042807.2	371.841	311.082	13.0094	337.18	6.58363	326.127	231.978	223.297	227.637	0.0549903	1.56802	0.0350699	0.972024	0.999731	Not DEG
NONMMUG070375.1	0	5.67668	3.00217	0	9.40519	3.87094	2.89295	4.42538	3.65916	-0.61945	2.2649	-0.273501	0.784468	NA	Not DEG
NONMMUG083274.1	17.1619	4.54134	24.0173	15.0054	5.64312	9.67735	15.2402	10.1086	12.6744	0.594285	1.12482	0.528338	0.597265	0.999731	Not DEG
NONMMUG090140.1	1.90688	0	0	0	0	0	0.635626	0	0.317813	1.90889	4.04654	0.471733	0.637118	NA	Not DEG
NONMMUG000118.2	89.6233	42.0074	25.0181	36.1895	35.7397	59.9995	52.2163	43.9763	48.0963	0.250062	0.685885	0.364583	0.715423	0.999731	Not DEG
NONMMUG088645.1	5.72063	0	0	2.64801	0	0	1.90688	0.882671	1.39477	1.10969	3.86988	0.286749	0.774304	NA	Not DEG
NONMMUG031003.2	0.953439	13.624	8.00578	0	5.64312	0	7.52775	1.88104	4.70439	1.99988	2.1221	0.942406	0.345985	NA	Not DEG
NONMMUG055367.1	0	0	0	0	0	2.9032	0	0.967735	0.483867	-2.35177	3.99149	-0.589196	0.55573	NA	Not DEG
NONMMUG080658.1	0	0	3.00217	0	0	0	1.00072	0	0.500361	2.55269	3.99681	0.638681	0.52303	NA	Not DEG
NONMMUG025324.2	42.9048	15.8947	16.0116	3.53069	0	0	24.937	1.1769	13.057	4.37615	1.44635	3.02564	0.00248105	0.294759	Up
NONMMUG034121.2	52.4392	30.6541	58.0419	22.9495	42.3234	36.7739	47.045	34.0156	40.5303	0.470465	0.664347	0.708161	0.478845	0.999731	Not DEG
NONMMUG093709.1	0.953439	7.94735	20.0145	9.70939	0.940519	12.5805	9.63841	7.74348	8.69095	0.315287	1.48157	0.212806	0.831478	0.999731	Not DEG
NONMMUG005166.2	42.9048	213.443	208.15	230.377	192.806	116.128	154.833	179.771	167.302	-0.216855	0.572989	-0.378462	0.705087	0.999731	Not DEG
NONMMUG017071.2	102.971	59.0374	61.0441	67.9657	77.1226	89.9993	74.351	78.3625	76.3568	-0.0739352	0.521261	-0.141839	0.887207	0.999731	Not DEG
NONMMUG079482.1	0	0	0	0	0	4.83867	0	1.61289	0.806445	-3.09066	3.95775	-0.780912	0.434854	NA	Not DEG
NONMMUG082671.1	0	4.54134	4.00289	2.64801	0	2.9032	2.84808	1.85041	2.34924	0.617214	2.61788	0.235769	0.813612	NA	Not DEG
NONMMUG012291.2	18.1153	27.248	21.0152	8.82671	3.76208	26.1288	22.1262	12.9059	17.516	0.778834	1.01089	0.770444	0.441037	0.999731	Not DEG
NONMMUG005880.2	0	0	0	15.8881	7.52415	0.967735	0	8.12666	4.06333	-5.42827	2.43588	-2.22847	0.0258495	NA	Down
NONMMUG062546.1	15.255	18.1654	0	0	0	0	11.1401	0	5.57007	6.02473	2.41695	2.4927	0.0126777	0.602464	Up
NONMMUG091776.1	23.836	6.81201	5.00361	11.4747	25.394	26.1288	11.8839	20.9992	16.4415	-0.814983	1.03453	-0.787785	0.430822	0.999731	Not DEG
NONMMUG046224.2	0	12.4887	1.00072	17.6534	2.82156	14.516	4.49647	11.6637	8.08007	-1.39101	1.64155	-0.847376	0.396786	0.999731	Not DEG
NONMMUG025122.2	85.8095	0	0	0	0	0	28.6032	0	14.3016	20.7367	3.90995	5.30357	NA	NA	Not DEG
NONMMUG085922.1	0	0	0	0	0	15.4838	0	5.16125	2.58063	-4.77059	3.53795	-1.34841	0.177527	NA	Not DEG
NONMMUG071592.1	16.2085	22.7067	0	5.29603	0	17.4192	12.9717	7.57175	10.2717	0.776665	1.68486	0.460968	0.644821	0.999731	Not DEG
NONMMUG007755.2	0	0	0	0	0	5.80641	0	1.93547	0.967735	-3.35419	3.94929	-0.849316	0.395705	NA	Not DEG
NONMMUG077792.1	3.81376	5.67668	2.00145	1.76534	18.8104	5.80641	3.83063	8.79404	6.31234	-1.20222	1.54162	-0.779839	0.435485	0.999731	Not DEG
NONMMUG067573.1	0	4.54134	1.00072	0	4.7026	4.83867	1.84735	3.18042	2.51389	-0.794211	2.60054	-0.305403	0.76006	NA	Not DEG
NONMMUG018235.2	0	0	0	15.8881	0	0	0	5.29603	2.64801	-4.81071	3.50276	-1.37341	0.169626	NA	Not DEG
NONMMUG009233.2	39.091	29.5187	40.0289	47.6643	17.8699	38.7094	36.2129	34.7478	35.4804	0.0599175	0.707763	0.0846576	0.932534	0.999731	Not DEG
NONMMUG067494.1	0	0	20.0145	0	0	0	6.67149	0	3.33574	5.28686	3.23754	1.63298	0.102473	NA	Not DEG
NONMMUG003042.2	1.90688	0	0	0	2.82156	0	0.635626	0.940519	0.788073	-0.549114	3.95902	-0.1387	0.889688	NA	Not DEG
NONMMUG032326.2	0	0	1.00072	0	0	0	0.333574	0	0.166787	1.10549	4.08047	0.270923	0.78645	NA	Not DEG
NONMMUG014434.2	45.7651	155.541	97.0701	133.283	87.4683	95.8057	99.4587	105.519	102.489	-0.0879643	0.548472	-0.160381	0.872581	0.999731	Not DEG
NONMMUG033082.2	12.3947	3.40601	0	8.82671	7.52415	2.9032	5.2669	6.41802	5.84246	-0.281771	1.72307	-0.163529	0.870102	0.999731	Not DEG
NONMMUG074459.1	0	0	0	0	15.0483	6.77414	0	7.27415	3.63707	-5.26616	2.7711	-1.90038	0.0573828	NA	Not DEG
NONMMUG002063.2	1.90688	0	5.00361	6.1787	7.52415	2.9032	2.3035	5.53535	3.91942	-1.25645	1.94018	-0.647594	0.517247	NA	Not DEG
NONMMUG056772.1	0	0	3.00217	0	0	0	1.00072	0	0.500361	2.55269	3.99681	0.638681	0.52303	NA	Not DEG
NONMMUG006005.2	66.7407	0	106.077	83.8538	11.2862	43.5481	57.6058	46.2294	51.9176	0.318221	1.07566	0.295839	0.767353	0.999731	Not DEG
NONMMUG019853.2	2.86032	2.27067	1.00072	0.882671	1.88104	0.967735	2.0439	1.24381	1.64386	0.717677	2.52028	0.284761	0.775827	NA	Not DEG
NONMMUG016540.2	148.737	172.571	147.106	248.913	155.186	227.418	156.138	210.506	183.322	-0.431642	0.398365	-1.08354	0.278571	0.999731	Not DEG
NONMMUG094811.1	21.9291	82.8795	92.0665	40.6029	119.446	0	65.625	53.3496	59.4873	0.297996	1.04567	0.28498	0.77566	0.999731	Not DEG
NONMMUG020382.2	0	0	5.00361	0	0	0	1.66787	0	0.833936	3.28825	3.9611	0.830137	0.406462	NA	Not DEG
NONMMUG018670.2	29.5566	77.2028	49.0354	26.4801	69.5984	44.5158	51.9316	46.8648	49.3982	0.146409	0.670294	0.218426	0.827097	0.999731	Not DEG
NONMMUG043043.2	10.4878	0	0	0	0	29.032	3.49594	9.67735	6.58664	-1.46052	2.45001	-0.596127	0.55109	0.999731	Not DEG
NONMMUG040137.2	12.3947	26.1127	24.0173	37.0722	27.2751	14.516	20.8416	26.2878	23.5647	-0.338629	0.838751	-0.40373	0.686411	0.999731	Not DEG
NONMMUG009268.2	53.3926	52.2254	78.0564	52.9603	54.5501	17.4192	61.2248	41.6432	51.434	0.555214	0.653154	0.850052	0.395296	0.999731	Not DEG
NONMMUG090999.1	0	5.67668	0	0	0	0	1.89223	0	0.946113	3.46031	3.95503	0.874915	0.38162	NA	Not DEG
NONMMUG040296.2	3.81376	13.624	0	0	2.82156	2.9032	5.81259	1.90825	3.86042	1.60705	2.23685	0.718445	0.472483	NA	Not DEG
NONMMUG088682.1	0.953439	11.3534	25.0181	43.2509	6.58363	16.4515	12.4416	22.0953	17.2685	-0.831147	1.18391	-0.702039	0.482655	0.999731	Not DEG
NONMMUG081570.1	0	0	3.00217	0	0	0	1.00072	0	0.500361	2.55269	3.99681	0.638681	0.52303	NA	Not DEG
NONMMUG042615.2	106.785	97.6388	83.06	78.5578	116.624	112.257	95.828	102.48	99.1539	-0.0962359	0.464327	-0.207259	0.835807	0.999731	Not DEG
NONMMUG026644.2	18.1153	13.624	17.0123	23.8321	0	21.2902	16.2506	15.0408	15.6457	0.111684	1.24151	0.0899584	0.92832	0.999731	Not DEG
NONMMUG070001.1	0	0	0	2.64801	0	0	0	0.882671	0.441336	-2.23116	3.99879	-0.557959	0.576872	NA	Not DEG
NONMMUG059243.1	0	0	0	0	0	1.93547	0	0.645156	0.322578	-1.76457	4.03337	-0.437493	0.661754	NA	Not DEG
NONMMUG065744.1	0	18.1654	0	10.5921	0	14.516	6.05512	8.36936	7.21224	-0.474711	2.10508	-0.225507	0.821585	0.999731	Not DEG
NONMMUG056773.1	0	1.13534	0	0	2.82156	0	0.378445	0.940519	0.659482	-1.35251	3.9937	-0.33866	0.734866	NA	Not DEG
NONMMUG090806.1	0	0	0	0	26.3345	19.3547	0	15.2297	7.61487	-6.33223	2.23114	-2.83812	0.00453805	0.400739	Down
NONMMUG027860.2	13.3481	3.40601	25.0181	2.64801	22.5725	8.70961	13.9241	11.31	12.6171	0.304639	1.22644	0.248392	0.803831	0.999731	Not DEG
NONMMUG000337.2	37.1841	19.3007	15.0108	16.7708	8.46467	24.1934	23.8319	16.4763	20.1541	0.534859	0.908059	0.589013	0.555852	0.999731	Not DEG
NONMMUG052778.1	0	0	6.00434	0	11.2862	0	2.00145	3.76208	2.88176	-0.906947	3.09265	-0.293259	0.769324	NA	Not DEG
NONMMUG000063.2	0	0	0	0	0	19.3547	0	6.45156	3.22578	-5.09259	3.28401	-1.55072	0.120968	NA	Not DEG
NONMMUG051867.1	3.81376	0	0	0	0	0	1.27125	0	0.635626	2.90211	3.97762	0.729611	0.465628	NA	Not DEG
NONMMUG061722.1	69.6011	53.3608	0	106.803	25.394	70.6446	40.9873	67.614	54.3006	-0.722574	1.00972	-0.715619	0.474227	0.999731	Not DEG
NONMMUG073396.1	0	4.54134	0	0	0	0	1.51378	0	0.75689	3.13659	3.96707	0.790655	0.429145	NA	Not DEG
NONMMUG036471.2	0	0	0	7.06137	0	1.93547	0	2.99895	1.49947	-3.99008	3.82341	-1.04359	0.296674	NA	Not DEG
NONMMUG050009.2	73.4148	78.3381	60.0434	30.0108	33.8587	45.4835	70.5988	36.451	53.5249	0.954233	0.5731	1.66504	0.0959055	0.999731	Not DEG
NONMMUG017402.2	5.72063	17.03	0	6.1787	0	29.9998	7.58355	12.0595	9.82152	-0.673093	1.7395	-0.386946	0.698796	0.999731	Not DEG
NONMMUG021692.2	311.775	338.33	354.256	301.874	280.275	272.901	334.787	285.016	309.902	0.232015	0.33167	0.699538	0.484216	0.999731	Not DEG
NONMMUG063631.1	0	0	0	0	0	5.80641	0	1.93547	0.967735	-3.35419	3.94929	-0.849316	0.395705	NA	Not DEG
NONMMUG033002.2	19.0688	15.8947	9.00651	32.6588	13.1673	26.1288	14.6567	23.985	19.3208	-0.711052	0.903614	-0.786898	0.431342	0.999731	Not DEG
NONMMUG081691.1	0	0	0	0	0	1.93547	0	0.645156	0.322578	-1.76457	4.03337	-0.437493	0.661754	NA	Not DEG
NONMMUG038879.2	5.72063	23.842	8.00578	10.5921	18.8104	36.7739	12.5228	22.0588	17.2908	-0.822677	1.02358	-0.803724	0.421557	0.999731	Not DEG
NONMMUG007923.2	3.81376	12.4887	7.00506	12.3574	5.64312	1.93547	7.76917	6.64533	7.20725	0.217397	1.413	0.153854	0.877724	0.999731	Not DEG
NONMMUG046759.1	0	1.13534	0	0	0	0	0.378445	0	0.189223	1.10549	4.08047	0.270923	0.78645	NA	Not DEG
NONMMUG071143.1	4.7672	23.842	21.0152	1.76534	15.0483	10.6451	16.5415	9.15291	12.8472	0.853676	1.19549	0.714078	0.475179	0.999731	Not DEG
NONMMUG007872.2	0	0	0	0	0	7.74188	0	2.58063	1.29031	-3.76987	3.93869	-0.957138	0.338498	NA	Not DEG
NONMMUG068448.1	15.255	0	6.00434	7.94404	0	9.67735	7.08645	5.8738	6.48013	0.27571	1.87836	0.146782	0.883304	0.999731	Not DEG
NONMMUG041089.2	58.1598	80.6088	32.0231	28.2455	59.2527	67.7414	56.9306	51.7465	54.3386	0.137274	0.643408	0.213355	0.83105	0.999731	Not DEG
NONMMUG060439.1	0	0	0	0	2.82156	0	0	0.940519	0.47026	-2.31429	3.9937	-0.579485	0.562262	NA	Not DEG
NONMMUG007275.2	18.1153	12.4887	10.0072	0	6.58363	22.2579	13.5371	9.61384	11.5755	0.497825	1.37977	0.360803	0.718247	0.999731	Not DEG
NONMMUG076981.1	7.62751	4.54134	12.0087	3.53069	0	0	8.05918	1.1769	4.61804	2.75943	2.03169	1.35819	0.174402	NA	Not DEG
NONMMUG059655.1	0	0	0	0	0	11.6128	0	3.87094	1.93547	-4.35547	3.91835	-1.11156	0.266329	NA	Not DEG
NONMMUG000396.2	13.3481	15.8947	32.0231	31.7762	21.6319	25.1611	20.422	26.1897	23.3059	-0.358769	0.825777	-0.434463	0.663952	0.999731	Not DEG
NONMMUG042159.2	0	0	1.00072	0	2.82156	5.80641	0.333574	2.87599	1.60478	-2.96455	3.40417	-0.870858	0.383832	NA	Not DEG
NONMMUG055529.1	40.9979	6.81201	26.0188	27.3628	39.5018	46.4513	24.6096	37.772	31.1908	-0.612407	0.817968	-0.748693	0.454042	0.999731	Not DEG
NONMMUG017459.2	8.58095	2.27067	0	8.82671	0	4.83867	3.61721	4.55513	4.08617	-0.329879	2.19247	-0.15046	0.880401	NA	Not DEG
NONMMUG085906.1	0	0	4.00289	0	0	11.6128	1.3343	3.87094	2.60262	-1.53059	3.2005	-0.478234	0.632484	NA	Not DEG
NONMMUG080195.1	3.81376	6.81201	27.0195	0	0	3.87094	12.5484	1.29031	6.91937	3.29764	1.8365	1.79561	0.0725562	0.999731	Not DEG
NONMMUG068844.1	0	0	0	0	0	11.6128	0	3.87094	1.93547	-4.35547	3.91835	-1.11156	0.266329	NA	Not DEG
NONMMUG013060.2	38.1376	89.6915	38.0275	56.491	138.256	105.483	55.2855	100.077	77.6811	-0.858894	0.597367	-1.4378	0.150491	0.999731	Not DEG
NONMMUG029210.2	25.7429	82.8795	79.0571	52.0776	31.9777	17.4192	62.5598	33.8248	48.1923	0.883926	0.71235	1.24086	0.214658	0.999731	Not DEG
NONMMUG085612.1	5.72063	0	0	10.5921	0	0	1.90688	3.53069	2.71878	-0.88361	3.14616	-0.280853	0.778823	NA	Not DEG
NONMMUG062916.1	4.7672	0	4.00289	7.94404	4.7026	6.77414	2.92336	6.47359	4.69848	-1.1362	1.78023	-0.638234	0.523321	NA	Not DEG
NONMMUG031654.2	45.7651	90.8268	83.06	79.4404	105.338	75.4833	73.2173	86.754	79.9856	-0.246355	0.52412	-0.470036	0.638329	0.999731	Not DEG
NONMMUG028623.2	26.6963	6.81201	11.008	11.4747	0	8.70961	14.8388	6.72811	10.7834	1.14208	1.3892	0.82211	0.411015	0.999731	Not DEG
NONMMUG010034.2	4.7672	7.94735	11.008	5.29603	5.64312	5.80641	7.9075	5.58185	6.74467	0.501829	1.35979	0.369048	0.712092	0.999731	Not DEG
NONMMUG052557.2	5.72063	3.40601	14.0101	7.06137	12.2267	9.67735	7.71225	9.65516	8.6837	-0.320166	1.26617	-0.252861	0.800376	0.999731	Not DEG
NONMMUG050203.1	0	0	4.00289	17.6534	6.58363	5.80641	1.3343	10.0145	5.67439	-2.89898	1.9015	-1.52457	0.127365	0.999731	Not DEG
NONMMUG021360.2	70.5545	20.436	147.106	65.3177	47.026	50.3222	79.3656	54.2219	66.7938	0.550955	0.690665	0.797717	0.425035	0.999731	Not DEG
NONMMUG090026.1	3.81376	0	0	0	0	0	1.27125	0	0.635626	2.90211	3.97762	0.729611	0.465628	NA	Not DEG
NONMMUG022733.2	20.9757	4.54134	8.00578	27.3628	19.7509	17.4192	11.1743	21.511	16.3426	-0.93866	1.004	-0.934921	0.349829	0.999731	Not DEG
NONMMUG006044.2	0	0	0	5.29603	0	0	0	1.76534	0.882671	-3.22782	3.95316	-0.816516	0.414205	NA	Not DEG
NONMMUG070469.1	2.86032	1.13534	2.00145	4.41336	0	0	1.99903	1.47112	1.73508	0.43811	2.96464	0.147778	0.882518	NA	Not DEG
NONMMUG081112.1	3.81376	5.67668	0	7.06137	1.88104	9.67735	3.16348	6.20658	4.68503	-0.977843	1.84197	-0.530867	0.595511	NA	Not DEG
NONMMUG094077.1	123.947	228.202	173.125	171.238	182.461	385.158	175.092	246.286	210.689	-0.492771	0.461603	-1.06752	0.285736	0.999731	Not DEG
NONMMUG053347.1	0	0	0	0	15.0483	0	0	5.0161	2.50805	-4.73037	3.57153	-1.32447	0.185347	NA	Not DEG
NONMMUG014583.2	32.4169	19.3007	24.0173	24.7148	34.7992	35.8062	25.245	31.7734	28.5092	-0.329023	0.736817	-0.446547	0.655202	0.999731	Not DEG
NONMMUG067866.1	4.7672	9.08268	0	22.9495	0	0	4.61663	7.64982	6.13322	-0.734844	2.22177	-0.330747	0.740835	0.999731	Not DEG
NONMMUG041253.2	30.5101	11.3534	18.013	26.4801	27.2751	57.0963	19.9588	36.9505	28.4547	-0.883467	0.799853	-1.10454	0.26936	0.999731	Not DEG
NONMMUG040791.2	0	0	2.00145	0	1.88104	0	0.667149	0.627013	0.647081	0.0968916	3.99651	0.0242441	0.980658	NA	Not DEG
NONMMUG038169.2	0	0	0	0	0	4.83867	0	1.61289	0.806445	-3.09066	3.95775	-0.780912	0.434854	NA	Not DEG
NONMMUG044214.2	11.4413	0	0	0	0	0	3.81376	0	1.90688	4.48191	3.92861	1.14084	0.253937	NA	Not DEG
NONMMUG086163.1	0	0	8.00578	0	0	0	2.66859	0	1.3343	3.96548	3.94083	1.00625	0.314294	NA	Not DEG
NONMMUG063325.1	22.8825	30.6541	41.0296	28.2455	23.513	43.5481	31.5221	31.7688	31.6455	-0.0109609	0.722398	-0.015173	0.987894	0.999731	Not DEG
NONMMUG044301.2	0	5.67668	0	0	0	0	1.89223	0	0.946113	3.46031	3.95503	0.874915	0.38162	NA	Not DEG
NONMMUG026097.2	59.1132	154.406	161.116	106.803	94.9924	93.8702	124.878	98.5553	111.717	0.3402	0.512114	0.664306	0.506494	0.999731	Not DEG
NONMMUG050180.1	1.90688	1.13534	0	0	0	0	1.01407	0	0.507036	2.56919	3.9958	0.642973	0.520241	NA	Not DEG
NONMMUG074771.1	0	1.13534	0	0	0	0	0.378445	0	0.189223	1.10549	4.08047	0.270923	0.78645	NA	Not DEG
NONMMUG008845.2	0	0	2.00145	0	0	0.967735	0.667149	0.322578	0.494863	1.00753	4.04091	0.249333	0.803103	NA	Not DEG
NONMMUG060804.1	5.72063	2.27067	5.00361	5.29603	4.7026	23.2256	4.33164	11.0748	7.7032	-1.34648	1.39861	-0.962726	0.335685	0.999731	Not DEG
NONMMUG065677.1	0	0	0	0	0	3.87094	0	1.29031	0.645156	-2.76799	3.97043	-0.697153	0.485707	NA	Not DEG
NONMMUG052676.1	0	6.81201	6.00434	0	0	12.5805	4.27212	4.19352	4.23282	0.0264712	2.44411	0.0108306	0.991359	NA	Not DEG
NONMMUG010169.2	242.174	66.9848	71.0513	235.673	182.461	136.451	126.737	184.862	155.799	-0.543079	0.555141	-0.978272	0.32794	0.999731	Not DEG
NONMMUG002333.2	23.836	9.08268	16.0116	41.4856	30.0966	40.6448	16.3101	37.409	26.8595	-1.1926	0.785337	-1.51859	0.128866	0.999731	Not DEG
NONMMUG027306.2	38.1376	31.7894	25.0181	10.5921	8.46467	32.903	31.6483	17.3199	24.4841	0.872342	0.864381	1.00921	0.312874	0.999731	Not DEG
NONMMUG016828.2	0	0	0	0	0	7.74188	0	2.58063	1.29031	-3.76987	3.93869	-0.957138	0.338498	NA	Not DEG
NONMMUG046757.1	0	5.67668	10.0072	0.882671	0	1.93547	5.22797	0.93938	3.08367	2.47856	2.44781	1.01256	0.311269	NA	Not DEG
NONMMUG020157.2	0	0	0	0	25.394	0	0	8.46467	4.23234	-5.48532	3.01877	-1.81707	0.0692061	NA	Not DEG
NONMMUG027287.2	57.2063	246.368	45.0325	64.435	22.5725	168.386	116.202	85.1311	100.667	0.447693	0.761474	0.58793	0.556579	0.999731	Not DEG
NONMMUG038132.2	0	1.13534	2.00145	0	0	0.967735	1.04559	0.322578	0.684086	1.64798	3.99336	0.41268	0.679841	NA	Not DEG
NONMMUG030178.2	3.81376	6.81201	19.0137	15.0054	4.7026	2.9032	9.87983	7.53707	8.70845	0.387364	1.34696	0.287584	0.773665	0.999731	Not DEG
NONMMUG095379.1	3.81376	0	2.00145	0	0	0	1.9384	0	0.9692	3.50699	3.9535	0.887059	0.375047	NA	Not DEG
NONMMUG061812.1	0	0	0	0.882671	0.940519	0	0	0.60773	0.303865	-1.68937	4.04003	-0.418156	0.675833	NA	Not DEG
NONMMUG082918.1	11.4413	0	0	0	0	0	3.81376	0	1.90688	4.48191	3.92861	1.14084	0.253937	NA	Not DEG
NONMMUG025879.2	17.1619	0	0	14.1227	0	16.4515	5.72063	10.1914	7.95602	-0.826876	2.03646	-0.406037	0.684716	0.999731	Not DEG
NONMMUG006840.2	167.805	79.4735	145.105	161.529	47.9665	95.8057	130.795	101.767	116.281	0.362376	0.553844	0.654292	0.512924	0.999731	Not DEG
NONMMUG004388.2	211.663	295.187	208.15	279.807	287.799	315.481	238.334	294.362	266.348	-0.305331	0.359106	-0.850251	0.395186	0.999731	Not DEG
NONMMUG023517.2	3.81376	0	8.00578	7.06137	0	0	3.93985	2.35379	3.14682	0.740719	2.65473	0.279018	0.780231	NA	Not DEG
NONMMUG022489.2	208.803	1099	81.0585	158.881	105.338	174.192	462.955	146.137	304.546	1.66288	0.671814	2.4752	0.0133161	0.613819	Up
NONMMUG023474.2	123.947	30.6541	3.00217	248.913	7.52415	71.6124	52.5344	109.35	80.9422	-1.05666	1.02486	-1.03103	0.302527	0.999731	Not DEG
NONMMUG047071.1	0	0	0	0	0	27.0966	0	9.03219	4.51609	-5.57814	2.96351	-1.88227	0.059799	NA	Not DEG
NONMMUG085352.1	0	0	0	2.64801	4.7026	0	0	2.4502	1.2251	-3.69767	3.94032	-0.938421	0.348028	NA	Not DEG
NONMMUG002809.2	68.6476	53.3608	143.103	60.9043	88.4088	97.7412	88.3706	82.3514	85.361	0.103332	0.557266	0.185427	0.852894	0.999731	Not DEG
NONMMUG082150.1	0	14.7594	0	0	15.0483	0	4.91979	5.0161	4.96794	-0.0335188	2.64623	-0.0126666	0.989894	NA	Not DEG
NONMMUG047350.1	0	0	0	0	9.40519	0	0	3.13506	1.56753	-4.0522	3.93303	-1.0303	0.302869	NA	Not DEG
NONMMUG054824.1	3.81376	0	0	9.70939	1.88104	3.87094	1.27125	5.15379	3.21252	-2.00102	2.34873	-0.851959	0.394237	NA	Not DEG
NONMMUG031501.2	92.4836	10.218	98.0708	354.834	6.58363	10.6451	66.9241	124.021	95.4725	-0.889755	1.66001	-0.535992	NA	NA	Not DEG
NONMMUG053916.1	0.953439	0	0	0	0	4.83867	0.317813	1.61289	0.965352	-2.12888	3.95775	-0.5379	0.590646	NA	Not DEG
NONMMUG001576.3	50.5323	38.6014	17.0123	362.778	12.2267	80.322	35.382	151.776	93.5788	-2.10122	0.849603	-2.47318	0.0133917	0.614767	Down
NONMMUG074712.1	0	4.54134	0	7.06137	0	0.967735	1.51378	2.67637	2.09507	-0.839306	3.10812	-0.270036	0.787132	NA	Not DEG
NONMMUG035246.2	20.9757	7.94735	35.0253	12.3574	36.6802	36.7739	21.3161	28.6039	24.96	-0.419811	0.889425	-0.472003	0.636925	0.999731	Not DEG
NONMMUG041939.2	0	9.08268	0	0	0	0	3.02756	0	1.51378	4.14117	3.93694	1.05187	0.292857	NA	Not DEG
NONMMUG001491.2	0	0	0	0	20.6914	0	0	6.89714	3.44857	-5.18984	3.21323	-1.61515	0.106279	NA	Not DEG
NONMMUG021689.2	151.597	177.112	181.131	206.545	227.606	275.804	169.947	236.652	203.299	-0.477741	0.374542	-1.27553	0.202121	0.999731	Not DEG
NONMMUG094182.1	74.3683	47.6841	106.077	33.5415	73.3605	35.8062	76.043	47.5694	61.8062	0.678326	0.611998	1.10838	0.267698	0.999731	Not DEG
NONMMUG088308.1	0	0	0	0	0	3.87094	0	1.29031	0.645156	-2.76799	3.97043	-0.697153	0.485707	NA	Not DEG
NONMMUG065970.1	0	0	0	1.76534	0	3.87094	0	1.87876	0.93938	-3.31317	3.95051	-0.83867	0.401654	NA	Not DEG
NONMMUG044135.2	552.995	588.104	546.395	516.363	500.356	587.415	562.498	534.711	548.604	0.0730618	0.304002	0.240333	0.810072	0.999731	Not DEG
NONMMUG038891.2	98.2042	60.1728	103.074	118.278	110.041	58.0641	87.1505	95.4609	91.3057	-0.130704	0.521421	-0.250669	0.80207	0.999731	Not DEG
NONMMUG067199.1	6.67407	0	15.0108	6.1787	7.52415	0	7.22831	4.56762	5.89796	0.663644	1.9238	0.344965	0.730121	0.999731	Not DEG
NONMMUG000490.2	0	0	3.00217	0	0	0	1.00072	0	0.500361	2.55269	3.99681	0.638681	0.52303	NA	Not DEG
NONMMUG065742.1	17.1619	17.03	11.008	4.41336	18.8104	0	15.0666	7.74125	11.4039	0.960363	1.37184	0.700055	0.483893	0.999731	Not DEG
NONMMUG075250.1	0	0	1.00072	0	0	0	0.333574	0	0.166787	1.10549	4.08047	0.270923	0.78645	NA	Not DEG
NONMMUG036271.2	0	3.40601	0	2.64801	0	0	1.13534	0.882671	1.009	0.34376	3.90349	0.0880648	0.929825	NA	Not DEG
NONMMUG032927.2	32.4169	46.5487	17.0123	22.0668	20.6914	42.5803	31.9927	28.4462	30.2194	0.168443	0.774733	0.21742	0.827881	0.999731	Not DEG
NONMMUG022856.2	1.90688	9.08268	0	0	0	0	3.66319	0	1.83159	4.41745	3.55012	1.24431	0.213385	NA	Not DEG
NONMMUG045418.2	125.854	80.6088	3.00217	94.4458	126.03	128.709	69.8216	116.395	93.1082	-0.736898	0.802577	-0.918164	0.358533	0.999731	Not DEG
NONMMUG023934.2	96.2974	97.6388	39.0282	75.0271	83.7062	185.805	77.6548	114.846	96.2504	-0.564493	0.577863	-0.976862	0.328637	0.999731	Not DEG
NONMMUG057319.1	0	0	0	0	0	15.4838	0	5.16125	2.58063	-4.77059	3.53795	-1.34841	0.177527	NA	Not DEG
NONMMUG042543.2	0	0	0	7.06137	0	0	0	2.35379	1.1769	-3.64196	3.94163	-0.923973	0.3555	NA	Not DEG
NONMMUG055164.1	3.81376	29.5187	0	0	0	7.74188	11.1108	2.58063	6.84573	2.1088	2.14512	0.983068	0.325574	0.999731	Not DEG
NONMMUG094102.1	22.8825	19.3007	10.0072	25.5975	36.6802	27.0966	17.3968	29.7914	23.5941	-0.775845	0.814976	-0.951985	0.341104	0.999731	Not DEG
NONMMUG055686.1	0	0	0	5.29603	2.82156	2.9032	0	3.6736	1.8368	-4.28205	3.12043	-1.37226	0.169982	NA	Not DEG
NONMMUG030947.2	973.461	802.682	1027.74	1047.73	881.266	873.864	934.629	934.287	934.458	0.00062474	0.298321	0.00209419	0.998329	0.999731	Not DEG
NONMMUG025979.2	8.58095	3.40601	13.0094	2.64801	0	0	8.33212	0.882671	4.60739	3.2187	2.05931	1.563	0.118052	NA	Not DEG
NONMMUG088957.1	0	0	0	2.64801	5.64312	0	0	2.76371	1.38185	-3.87119	3.93201	-0.984532	0.324854	NA	Not DEG
NONMMUG086880.1	0	0	0	0	6.58363	0	0	2.19454	1.09727	-3.53745	3.94424	-0.896865	0.369791	NA	Not DEG
NONMMUG032763.2	0	0	8.00578	9.70939	15.0483	21.2902	2.66859	15.3493	9.00894	-2.51606	1.61947	-1.55363	0.120273	0.999731	Not DEG
NONMMUG019763.2	43.8582	7.94735	11.008	6.1787	14.1078	2.9032	20.9378	7.7299	14.3339	1.44062	1.15326	1.24917	0.211604	0.999731	Not DEG
NONMMUG026836.2	98.2042	116.94	142.103	161.529	114.743	89.0316	119.082	121.768	120.425	-0.0330151	0.45966	-0.0718251	0.942741	0.999731	Not DEG
NONMMUG028527.2	0	0	0	0	3.76208	0	0	1.25403	0.627013	-2.72965	3.97213	-0.687202	0.491955	NA	Not DEG
NONMMUG031260.2	0	0	0	0.882671	0	0	0	0.294224	0.147112	-0.818059	4.08047	-0.200481	0.841104	NA	Not DEG
NONMMUG055505.1	0	1.13534	0	0	0	0.967735	0.378445	0.322578	0.350512	0.143722	4.08047	0.0352219	0.971903	NA	Not DEG
NONMMUG077584.1	0	7.94735	4.00289	0	1.88104	0	3.98341	0.627013	2.30521	2.66707	2.97637	0.89608	0.37021	NA	Not DEG
NONMMUG059834.1	6.67407	4.54134	6.00434	0	15.0483	19.3547	5.73992	11.4677	8.60379	-0.994736	1.5211	-0.653957	0.513139	0.999731	Not DEG
NONMMUG025784.2	0	2.27067	1.00072	0	0	0	1.09046	0	0.545232	2.66504	3.99014	0.667907	0.504193	NA	Not DEG
NONMMUG074740.1	61.9735	14.7594	29.021	41.4856	96.8735	1.93547	35.2513	46.7648	41.0081	-0.405857	0.992307	-0.409004	0.682537	0.999731	Not DEG
NONMMUG092990.1	3.81376	0	0	0	0	0	1.27125	0	0.635626	2.90211	3.97762	0.729611	0.465628	NA	Not DEG
NONMMUG008000.2	0	0	0	0	0	3.87094	0	1.29031	0.645156	-2.76799	3.97043	-0.697153	0.485707	NA	Not DEG
NONMMUG092702.1	0.953439	0	0	5.29603	2.82156	7.74188	0.317813	5.28649	2.80215	-3.8444	2.50261	-1.53616	0.1245	NA	Not DEG
NONMMUG063025.1	3.81376	0	0	0	7.52415	0	1.27125	2.50805	1.88965	-0.970487	3.56673	-0.272094	0.785549	NA	Not DEG
NONMMUG056072.1	0	2.27067	16.0116	0	0	3.87094	6.09408	1.29031	3.6922	2.24875	2.56124	0.877995	0.379946	NA	Not DEG
NONMMUG044040.2	6.67407	0	4.00289	0	0.940519	7.74188	3.55899	2.89413	3.22656	0.308176	2.40122	0.128341	0.897879	NA	Not DEG
NONMMUG034701.2	0	5.67668	0	20.3014	8.46467	0	1.89223	9.58871	5.74047	-2.36468	2.19762	-1.07602	0.281919	0.999731	Not DEG
NONMMUG066623.2	11.4413	0	0	0	0	0	3.81376	0	1.90688	4.48191	3.92861	1.14084	0.253937	NA	Not DEG
NONMMUG074903.1	1.90688	14.7594	17.0123	6.1787	30.0966	12.5805	11.2262	16.2853	13.7557	-0.539272	1.17395	-0.459365	0.645972	0.999731	Not DEG
NONMMUG088981.1	1.90688	7.94735	12.0087	6.1787	15.0483	16.4515	7.28763	12.5595	9.92357	-0.786636	1.24653	-0.631063	0.527999	0.999731	Not DEG
NONMMUG066762.1	1.90688	0	0	0	0	0	0.635626	0	0.317813	1.90889	4.04654	0.471733	0.637118	NA	Not DEG
NONMMUG074882.1	4.7672	0	0	0	0	0	1.58907	0	0.794533	3.22255	3.96361	0.813035	0.416198	NA	Not DEG
NONMMUG048286.1	3.81376	0	0	0	0	5.80641	1.27125	1.93547	1.60336	-0.595474	3.78558	-0.157301	0.875008	NA	Not DEG
NONMMUG057331.1	0	0	0	0	0	5.80641	0	1.93547	0.967735	-3.35419	3.94929	-0.849316	0.395705	NA	Not DEG
NONMMUG022372.2	27.6497	14.7594	13.0094	11.4747	4.7026	7.74188	18.4728	7.97307	13.2229	1.212	1.05638	1.14731	0.251252	0.999731	Not DEG
NONMMUG081976.1	1.90688	0	0	0	0	19.3547	0.635626	6.45156	3.54359	-3.31758	2.94282	-1.12735	0.259595	NA	Not DEG
NONMMUG065374.1	0	0	5.00361	0	0	0	1.66787	0	0.833936	3.28825	3.9611	0.830137	0.406462	NA	Not DEG
NONMMUG082307.1	0	3.40601	0	0	0	0.967735	1.13534	0.322578	0.728957	1.75687	3.98713	0.440635	0.659477	NA	Not DEG
NONMMUG070411.1	0	0	0	7.94404	0	0	0	2.64801	1.32401	-3.81158	3.93778	-0.967952	0.333068	NA	Not DEG
NONMMUG085999.1	2.86032	0	1.00072	1.76534	29.1561	12.5805	1.28701	14.5007	7.89384	-3.46402	1.67627	-2.06651	0.0387802	0.907418	Down
NONMMUG021122.2	134.435	64.7141	82.0593	46.7816	83.7062	43.5481	93.7361	58.0119	75.874	0.693829	0.562453	1.23358	0.217361	0.999731	Not DEG
NONMMUG028394.2	0	0	0	0.882671	0.940519	0	0	0.60773	0.303865	-1.68937	4.04003	-0.418156	0.675833	NA	Not DEG
NONMMUG020343.2	17.1619	10.218	29.021	59.139	27.2751	19.3547	18.8003	35.2562	27.0283	-0.905768	0.839809	-1.07854	0.280793	0.999731	Not DEG
NONMMUG042093.2	14.3016	29.5187	22.0159	7.06137	20.6914	11.6128	21.9454	13.1219	17.5336	0.741092	0.945713	0.783633	0.433255	0.999731	Not DEG
NONMMUG057071.1	0.953439	1.13534	34.0246	3.53069	4.7026	4.83867	12.0378	4.35732	8.19755	1.46866	1.58286	0.927853	0.353484	0.999731	Not DEG
NONMMUG096090.1	11.4413	0	0	0	0	3.87094	3.81376	1.29031	2.55203	1.57295	3.21398	0.489408	0.624553	NA	Not DEG
NONMMUG051826.1	6.67407	0	5.00361	8.82671	2.82156	25.1611	3.89256	12.2698	8.08118	-1.64406	1.55182	-1.05944	0.289398	0.999731	Not DEG
NONMMUG016137.2	47.672	0	13.0094	8.82671	11.2862	29.9998	20.2271	16.7042	18.4657	0.281373	1.26636	0.22219	0.824166	0.999731	Not DEG
NONMMUG094284.1	11.4413	4.54134	4.00289	0	0	0	6.66183	0	3.33092	5.28538	2.51367	2.10266	0.0354959	NA	Up
NONMMUG026838.2	20.9757	13.624	28.0202	2.64801	9.40519	14.516	20.8733	8.85641	14.8649	1.24208	1.05367	1.17882	0.238471	0.999731	Not DEG
NONMMUG020238.2	22.8825	21.5714	30.0217	14.1227	32.9182	52.2577	24.8252	33.0995	28.9624	-0.412819	0.791365	-0.521654	0.601911	0.999731	Not DEG
NONMMUG048847.1	0	0	3.00217	0	0	0	1.00072	0	0.500361	2.55269	3.99681	0.638681	0.52303	NA	Not DEG
NONMMUG064152.1	27.6497	20.436	60.0434	20.3014	5.64312	9.67735	36.043	11.874	23.9585	1.59996	0.897265	1.78315	0.0745617	0.999731	Not DEG
NONMMUG094126.1	18.1153	6.81201	0	0	0	0	8.30912	0	4.15456	5.60374	2.65523	2.11045	0.0348195	NA	Up
NONMMUG063364.1	20.0222	32.9247	29.021	14.1227	4.7026	7.74188	27.3226	8.85574	18.0892	1.62115	0.937847	1.72859	0.0838832	0.999731	Not DEG
NONMMUG019577.2	63.8804	79.4735	7.00506	71.4964	86.5278	51.2899	50.1197	69.7714	59.9455	-0.478912	0.757194	-0.632483	0.527071	0.999731	Not DEG
NONMMUG094232.1	1.90688	0	0	0	0	15.4838	0.635626	5.16125	2.89844	-2.99792	3.12635	-0.958919	0.337599	NA	Not DEG
NONMMUG092563.1	24.7894	30.6541	32.0231	10.5921	68.6579	12.5805	29.1555	30.6102	29.8829	-0.0700344	0.886167	-0.0790306	0.937008	0.999731	Not DEG
NONMMUG015643.2	76.2751	29.5187	39.0282	46.7816	83.7062	30.9675	48.274	53.8184	51.0462	-0.154552	0.673152	-0.229594	0.818407	0.999731	Not DEG
NONMMUG083587.1	15.255	18.1654	4.00289	8.82671	27.2751	8.70961	12.4744	14.9371	13.7058	-0.261636	1.11002	-0.235704	0.813662	0.999731	Not DEG
NONMMUG032769.2	86.763	91.9622	99.0716	91.7978	184.342	125.805	92.5989	133.982	113.29	-0.532654	0.468897	-1.13597	0.255968	0.999731	Not DEG
NONMMUG026393.2	3.81376	3.40601	5.00361	7.06137	8.46467	3.87094	4.07446	6.46566	5.27006	-0.665646	1.51891	-0.43824	0.661212	0.999731	Not DEG
NONMMUG043651.2	2.86032	1.13534	18.013	19.4188	0	14.516	7.33622	11.3116	9.32391	-0.622579	1.61266	-0.386057	0.699455	0.999731	Not DEG
NONMMUG032235.2	7.62751	601.728	10.0072	5.29603	7.52415	22.2579	206.454	11.6927	109.073	4.14287	1.72009	2.40852	NA	NA	Not DEG
NONMMUG046254.2	0	1.13534	0	2.64801	2.82156	3.87094	0.378445	3.1135	1.74597	-3.08051	2.9467	-1.04541	0.295834	NA	Not DEG
NONMMUG063211.1	0	0	0	0	5.64312	0	0	1.88104	0.940519	-3.31496	3.95045	-0.839134	0.401394	NA	Not DEG
NONMMUG008232.2	1.90688	2.27067	4.00289	1.76534	3.76208	19.3547	2.72681	8.29404	5.51042	-1.6016	1.65069	-0.97026	0.331917	0.999731	Not DEG
NONMMUG011452.2	74.3683	40.8721	2.00145	8.82671	1.88104	1.93547	39.0806	4.21441	21.6475	3.20569	1.19878	2.67413	0.00749244	0.490878	Up
NONMMUG019890.2	2.86032	5.67668	37.0267	3.53069	22.5725	16.4515	15.1879	14.1849	14.6864	0.101376	1.23022	0.0824054	0.934324	0.999731	Not DEG
NONMMUG026734.2	0	0	2.00145	1.76534	0	0	0.667149	0.588448	0.627798	0.176368	4.0038	0.04405	0.964865	NA	Not DEG
NONMMUG034233.2	1.90688	3.40601	0	0	0	0	1.77096	0	0.885481	3.36934	3.95815	0.851242	0.394635	NA	Not DEG
NONMMUG006716.2	161.131	191.872	254.184	206.545	295.323	184.837	202.395	228.902	215.649	-0.177598	0.402087	-0.441691	0.658713	0.999731	Not DEG
NONMMUG053100.1	6.67407	0	0	0	0	0	2.22469	0	1.11235	3.70621	3.9475	0.938875	0.347795	NA	Not DEG
NONMMUG019896.2	1.90688	2.27067	3.00217	0	0	9.67735	2.39324	3.22578	2.80951	-0.427066	2.5182	-0.169592	0.865331	NA	Not DEG
NONMMUG045656.2	0	0	0	1.76534	0	0	0	0.588448	0.294224	-1.64922	4.04373	-0.407847	0.683386	NA	Not DEG
NONMMUG015844.2	39.091	31.7894	50.0361	120.926	47.9665	49.3545	40.3055	72.749	56.5272	-0.851967	0.629595	-1.3532	0.175992	0.999731	Not DEG
NONMMUG082309.1	0	0	0	0	0	15.4838	0	5.16125	2.58063	-4.77059	3.53795	-1.34841	0.177527	NA	Not DEG
NONMMUG080824.1	0	2.27067	0	0	0	0	0.75689	0	0.378445	2.12818	4.02714	0.528459	0.597181	NA	Not DEG
NONMMUG045653.2	0	0	0	0	0	3.87094	0	1.29031	0.645156	-2.76799	3.97043	-0.697153	0.485707	NA	Not DEG
NONMMUG035318.2	0	0	0	0	4.7026	0	0	1.56753	0.783766	-3.05179	3.95914	-0.770821	0.440813	NA	Not DEG
NONMMUG043993.2	73.4148	23.842	16.0116	7.06137	11.2862	1.93547	37.7561	6.76102	22.2586	2.4812	1.00382	2.47176	0.013445	0.614843	Up
NONMMUG048963.1	1.90688	3.40601	2.00145	1.76534	1.88104	19.3547	2.43811	7.66702	5.05257	-1.65561	1.73942	-0.951818	0.341189	NA	Not DEG
NONMMUG065015.1	4.7672	30.6541	0	0	0	0	11.8071	0	5.90354	6.1065	2.42934	2.51364	0.0119491	0.587211	Up
NONMMUG070524.1	3.81376	0	3.00217	0.882671	2.82156	0	2.27197	1.23474	1.75336	0.88484	2.94109	0.300854	0.763526	NA	Not DEG
NONMMUG092169.1	2.86032	0	0	0	2.82156	0	0.953439	0.940519	0.946979	0.0314526	3.91225	0.00803952	0.993585	NA	Not DEG
NONMMUG051298.1	0	0	2.00145	0	0	0	0.667149	0	0.333574	1.9693	4.04091	0.487342	0.626016	NA	Not DEG
NONMMUG064688.1	0	0	0	0.882671	2.82156	0	0	1.23474	0.617371	-2.70879	3.97307	-0.681786	0.495374	NA	Not DEG
NONMMUG013795.2	24.7894	53.3608	36.026	58.2563	40.4423	58.0641	38.0587	52.2542	45.1565	-0.46045	0.635886	-0.724107	0.469	0.999731	Not DEG
NONMMUG020575.2	0	9.08268	4.00289	0	0	0	4.36186	0	2.18093	4.66981	3.30703	1.41209	0.157925	NA	Not DEG
NONMMUG073366.1	3.81376	6.81201	15.0108	3.53069	1.88104	6.77414	8.54554	4.06196	6.30375	1.07489	1.47716	0.727676	0.466812	0.999731	Not DEG
NONMMUG083423.1	0	0	0	1.76534	0	2.9032	0	1.55618	0.778091	-3.04174	3.9595	-0.768213	0.442361	NA	Not DEG
NONMMUG079131.1	0	0	0	0	0	3.87094	0	1.29031	0.645156	-2.76799	3.97043	-0.697153	0.485707	NA	Not DEG
NONMMUG043325.2	174.479	148.729	32.0231	78.5578	194.687	179.031	118.41	150.759	134.585	-0.348232	0.611994	-0.569012	0.569348	0.999731	Not DEG
NONMMUG051774.1	41.9513	14.7594	26.0188	5.29603	13.1673	11.6128	27.5765	10.0254	18.8009	1.46457	0.939801	1.55838	0.119143	0.999731	Not DEG
NONMMUG091199.1	0	0	0	0	0	1.93547	0	0.645156	0.322578	-1.76457	4.03337	-0.437493	0.661754	NA	Not DEG
NONMMUG028729.2	0	0	0	0	0	19.3547	0	6.45156	3.22578	-5.09259	3.28401	-1.55072	0.120968	NA	Not DEG
NONMMUG039070.2	71.5079	39.7367	40.0289	24.7148	32.9182	48.3867	50.4245	35.3399	42.8822	0.515504	0.658069	0.783357	0.433417	0.999731	Not DEG
NONMMUG044878.2	70.5545	372.39	337.244	505.771	294.383	43.5481	260.063	281.234	270.648	-0.113744	0.693536	-0.164005	0.869727	0.999731	Not DEG
NONMMUG066300.1	0.953439	7.94735	0	17.6534	6.58363	4.83867	2.96693	9.69191	6.32942	-1.72813	1.7158	-1.00718	0.313846	0.999731	Not DEG
NONMMUG051753.1	0	0	15.0108	2.64801	0	0	5.00361	0.882671	2.94314	2.49362	3.07379	0.811252	0.417221	NA	Not DEG
NONMMUG013959.2	13.3481	29.5187	25.0181	25.5975	15.0483	34.8384	22.6283	25.1614	23.8949	-0.155289	0.828473	-0.18744	0.851316	0.999731	Not DEG
NONMMUG018689.2	63.8804	38.6014	44.0318	30.8935	44.2044	70.6446	48.8379	48.5808	48.7094	0.0102232	0.632085	0.0161738	0.987096	0.999731	Not DEG
NONMMUG078138.1	0	0	0	0	5.64312	0	0	1.88104	0.940519	-3.31496	3.95045	-0.839134	0.401394	NA	Not DEG
NONMMUG033727.2	180.2	132.834	171.124	45.8989	217.26	81.2897	161.386	114.816	138.101	0.492052	0.566692	0.868288	0.385236	0.999731	Not DEG
NONMMUG027078.2	12.3947	10.218	10.0072	7.94404	9.40519	7.74188	10.8733	8.3637	9.61851	0.379324	1.14931	0.330045	0.741366	0.999731	Not DEG
NONMMUG066485.1	0	0	8.00578	0	0	0	2.66859	0	1.3343	3.96548	3.94083	1.00625	0.314294	NA	Not DEG
NONMMUG003396.2	0	20.436	0	5.29603	0.940519	8.70961	6.81201	4.98205	5.89703	0.444433	2.05308	0.216471	0.828621	0.999731	Not DEG
NONMMUG043123.2	5.72063	7.94735	1.00072	7.06137	3.76208	2.9032	4.88957	4.57555	4.73256	0.0898637	1.66468	0.0539825	0.956949	NA	Not DEG
NONMMUG088708.1	10.4878	3.40601	4.00289	14.1227	1.88104	0	5.96558	5.33459	5.65008	0.159783	1.79282	0.0891239	0.928983	0.999731	Not DEG
NONMMUG014542.2	0	3.40601	0	0	0	11.6128	1.13534	3.87094	2.50314	-1.78467	3.25151	-0.548875	0.583091	NA	Not DEG
NONMMUG018180.3	128.714	87.4208	41.0296	91.7978	85.5872	71.6124	85.7216	82.9991	84.3604	0.0468378	0.556417	0.0841774	0.932915	0.999731	Not DEG
NONMMUG058419.1	0	7.94735	0	0	0	0	2.64912	0	1.32456	3.94785	3.94125	1.00168	0.316501	NA	Not DEG
NONMMUG048177.1	0	0	7.00506	0	8.46467	0	2.33502	2.82156	2.57829	-0.269952	3.20589	-0.084205	0.932893	NA	Not DEG
NONMMUG013594.2	0	0	3.00217	19.4188	0	0	1.00072	6.47292	3.73682	-2.68889	2.86143	-0.939702	0.34737	NA	Not DEG
NONMMUG049739.2	36.2307	4.54134	58.0419	32.6588	36.6802	60.9673	32.938	43.4355	38.1867	-0.395222	0.847554	-0.466309	0.640994	0.999731	Not DEG
NONMMUG033959.2	0	4.54134	8.00578	0	0	0	4.18237	0	2.09119	4.61129	3.35369	1.37499	0.169135	NA	Not DEG
NONMMUG021196.2	14.3016	0	22.0159	18.5361	28.2156	44.5158	12.1058	30.4225	21.2642	-1.32265	1.11071	-1.19082	0.233725	0.999731	Not DEG
NONMMUG017545.2	209.757	256.586	280.202	264.801	291.561	263.224	248.848	273.195	261.022	-0.134902	0.351924	-0.383326	0.701478	0.999731	Not DEG
NONMMUG074279.1	1.90688	0	3.00217	0	0	26.1288	1.63635	8.70961	5.17298	-2.40088	2.36374	-1.01571	0.309766	0.999731	Not DEG
NONMMUG066659.1	0	0	0	0	0	11.6128	0	3.87094	1.93547	-4.35547	3.91835	-1.11156	0.266329	NA	Not DEG
NONMMUG045252.2	0	0	0	10.5921	0	0	0	3.53069	1.76534	-4.226	3.93006	-1.0753	0.282239	NA	Not DEG
NONMMUG062265.1	9.53439	7.94735	5.00361	12.3574	5.64312	17.4192	7.49512	11.8066	9.65085	-0.654851	1.19843	-0.546426	0.584773	0.999731	Not DEG
NONMMUG037852.2	4.7672	0	6.00434	0	1.88104	10.6451	3.59051	4.17537	3.88294	-0.208998	2.23602	-0.0934687	0.925531	NA	Not DEG
NONMMUG038541.2	72.4614	65.8494	21.0152	27.3628	92.1709	20.3224	53.1087	46.6187	49.8637	0.187932	0.767821	0.24476	0.806642	0.999731	Not DEG
NONMMUG089034.1	3.81376	0	1.00072	0	8.46467	0	1.60483	2.82156	2.21319	-0.804639	3.05257	-0.263594	0.792093	NA	Not DEG
NONMMUG034941.2	12.3947	28.3834	32.0231	32.6588	44.2044	28.0643	24.2671	34.9758	29.6215	-0.529567	0.759473	-0.697281	0.485627	0.999731	Not DEG
NONMMUG053838.1	1.90688	5.67668	1.00072	2.64801	4.7026	0.967735	2.86143	2.77278	2.8171	0.0364635	2.06424	0.0176644	0.985907	NA	Not DEG
NONMMUG007820.2	15.255	0	6.00434	0	0	0	7.08645	0	3.54323	5.37573	2.78533	1.93002	0.0536047	NA	Not DEG
NONMMUG092636.1	2.86032	0	8.00578	2.64801	11.2862	0	3.62203	4.64475	4.13339	-0.354184	2.18962	-0.161756	0.871498	NA	Not DEG
NONMMUG018453.2	4.7672	3.40601	5.00361	3.53069	77.1226	30.9675	4.39227	37.2069	20.7996	-3.07811	1.12293	-2.74113	0.00612279	0.458175	Down
NONMMUG040645.2	22.8825	3.40601	13.0094	9.70939	15.9888	2.9032	13.0993	9.53381	11.3166	0.462012	1.22951	0.375769	0.707088	0.999731	Not DEG
NONMMUG020418.2	68.6476	76.0675	82.0593	74.1444	77.1226	61.935	75.5915	71.0673	73.3294	0.0886251	0.498344	0.177839	0.858849	0.999731	Not DEG
NONMMUG039940.2	0	6.81201	0	3.53069	2.82156	17.4192	2.27067	7.92382	5.09725	-1.82305	2.04486	-0.891531	0.372644	0.999731	Not DEG
NONMMUG043764.2	3.81376	3.40601	6.00434	35.3069	32.9182	18.387	4.40803	28.8707	16.6393	-2.7089	0.999355	-2.71065	0.00671515	0.474757	Down
NONMMUG016817.2	3.81376	5.67668	18.013	10.5921	25.394	40.6448	9.16781	25.5436	17.3557	-1.47561	1.04531	-1.41165	0.158052	0.999731	Not DEG
NONMMUG066578.1	4.7672	9.08268	0	0	0	0	4.61663	0	2.30831	4.75273	3.23261	1.47024	0.141496	NA	Not DEG
NONMMUG022276.2	0	0	0	0	3.76208	0	0	1.25403	0.627013	-2.72965	3.97213	-0.687202	0.491955	NA	Not DEG
NONMMUG059111.1	3.81376	0	0	0	0	0	1.27125	0	0.635626	2.90211	3.97762	0.729611	0.465628	NA	Not DEG
NONMMUG089992.1	7.62751	6.81201	2.00145	3.53069	13.1673	6.77414	5.48032	7.82403	6.65218	-0.513241	1.4385	-0.356789	0.72125	0.999731	Not DEG
NONMMUG048467.1	2.86032	2.27067	1.00072	1.76534	2.82156	0.967735	2.0439	1.85154	1.94772	0.142187	2.34147	0.0607258	0.951578	NA	Not DEG
NONMMUG081123.1	0	0	0	6.1787	0	0	0	2.05957	1.02978	-3.4497	3.94658	-0.8741	0.382064	NA	Not DEG
NONMMUG009503.2	49.5788	77.2028	70.0506	79.4404	89.3493	66.7737	65.6107	78.5211	72.0659	-0.260632	0.516966	-0.504157	0.614151	0.999731	Not DEG
NONMMUG039384.2	62.927	98.7742	79.0571	57.3736	54.5501	75.4833	80.2528	62.469	71.3609	0.360548	0.52128	0.69166	0.489151	0.999731	Not DEG
NONMMUG013957.2	0	0	3.00217	0	0	0	1.00072	0	0.500361	2.55269	3.99681	0.638681	0.52303	NA	Not DEG
NONMMUG054340.2	0	14.7594	0	0	4.7026	0	4.91979	1.56753	3.24366	1.64653	2.98039	0.552456	0.580636	NA	Not DEG
NONMMUG071619.1	29.5566	5.67668	0	6.1787	38.5613	25.1611	11.7444	23.3004	17.5224	-0.982948	1.29904	-0.756674	0.449245	0.999731	Not DEG
NONMMUG040516.2	288.892	283.834	321.232	219.785	379.97	366.771	297.986	322.175	310.081	-0.112185	0.369927	-0.303261	0.761691	0.999731	Not DEG
NONMMUG006224.2	15.255	13.624	22.0159	2.64801	25.394	49.3545	16.965	25.7988	21.3819	-0.602053	1.03047	-0.584252	0.559051	0.999731	Not DEG
NONMMUG028227.2	0	0	0	0	3.76208	0	0	1.25403	0.627013	-2.72965	3.97213	-0.687202	0.491955	NA	Not DEG
NONMMUG093865.1	12.3947	10.218	14.0101	15.8881	4.7026	12.5805	12.2076	11.0571	11.6323	0.142751	1.10336	0.129379	0.897058	0.999731	Not DEG
NONMMUG021332.2	7.62751	9.08268	21.0152	45.0162	0	5.80641	12.5751	16.9409	14.758	-0.431777	1.38639	-0.31144	0.755466	0.999731	Not DEG
NONMMUG076576.1	0	0	0	2.64801	0	0	0	0.882671	0.441336	-2.23116	3.99879	-0.557959	0.576872	NA	Not DEG
NONMMUG065160.1	0	4.54134	0	0	2.82156	0	1.51378	0.940519	1.22715	0.678585	3.87776	0.174994	0.861084	NA	Not DEG
NONMMUG091278.1	4.7672	18.1654	25.0181	0	0	4.83867	15.9835	1.61289	8.79822	3.32301	1.66529	1.99546	0.0459929	0.939796	Up
NONMMUG032160.3	18.1153	11.3534	21.0152	11.4747	40.4423	8.70961	16.828	20.2089	18.5184	-0.26187	0.980079	-0.267193	0.78932	0.999731	Not DEG
NONMMUG076455.1	0	0	0	0.882671	18.8104	0.967735	0	6.88693	3.44346	-5.1876	2.67209	-1.9414	0.0522094	NA	Not DEG
NONMMUG018841.2	93.437	96.5035	104.075	100.625	116.624	130.644	98.0052	115.964	106.985	-0.242423	0.439866	-0.551128	0.581546	0.999731	Not DEG
NONMMUG093362.1	3.81376	3.40601	0	0	3.76208	0	2.40659	1.25403	1.83031	0.94122	3.20632	0.293552	0.769101	NA	Not DEG
NONMMUG019322.2	19.0688	51.0901	28.0202	37.9549	6.58363	35.8062	32.7264	26.7816	29.754	0.286095	0.862874	0.33156	0.740221	0.999731	Not DEG
NONMMUG073711.1	14.3016	35.1954	7.00506	19.4188	6.58363	39.6771	18.834	21.8932	20.3636	-0.22068	1.01239	-0.217979	0.827445	0.999731	Not DEG
NONMMUG016665.2	10.4878	68.1201	32.0231	73.2617	28.2156	97.7412	36.877	66.4062	51.6416	-0.852938	0.768959	-1.10921	0.267339	0.999731	Not DEG
NONMMUG027997.3	0	0	0	0	0	19.3547	0	6.45156	3.22578	-5.09259	3.28401	-1.55072	0.120968	NA	Not DEG
NONMMUG084124.1	12.3947	82.8795	2.00145	18.5361	15.9888	13.5483	32.4252	16.0244	24.2248	1.01227	1.10093	0.919475	0.357847	0.999731	Not DEG
NONMMUG024247.2	54.346	52.2254	30.0217	42.3682	18.8104	14.516	45.531	25.2315	35.3813	0.848924	0.739686	1.14768	0.2511	0.999731	Not DEG
NONMMUG019654.3	118.226	139.646	146.106	112.099	85.5872	170.321	134.659	122.669	128.664	0.134693	0.454979	0.296042	0.767198	0.999731	Not DEG
NONMMUG041630.2	67.6942	72.6615	56.0405	60.0217	84.6467	44.5158	65.4654	63.0614	64.2634	0.0533538	0.549976	0.0970112	0.922717	0.999731	Not DEG
NONMMUG085472.1	0	0	4.00289	0	0	2.9032	1.3343	0.967735	1.15102	0.471381	3.88313	0.121392	0.90338	NA	Not DEG
NONMMUG094567.1	24.7894	0	15.0108	3.53069	0	19.3547	13.2668	7.62846	10.4476	0.803649	1.69488	0.474162	0.635385	0.999731	Not DEG
NONMMUG095545.1	12.3947	24.9774	17.0123	4.41336	4.7026	26.1288	18.1281	11.7483	14.9382	0.626984	1.09958	0.570204	0.56854	0.999731	Not DEG
NONMMUG039458.2	11.4413	0	3.00217	2.64801	1.88104	5.80641	4.81448	3.44515	4.12982	0.491655	1.95715	0.25121	0.801652	NA	Not DEG
NONMMUG013141.2	0	7.94735	3.00217	0	0	0	3.64984	0	1.82492	4.41241	3.53852	1.24696	0.212411	NA	Not DEG
NONMMUG064293.1	8.58095	3.40601	7.00506	7.94404	12.2267	5.80641	6.33067	8.65907	7.49487	-0.447404	1.32017	-0.338898	0.734687	0.999731	Not DEG
NONMMUG016857.2	0	0	0	9.70939	15.9888	10.6451	0	12.1144	6.05722	-6.0027	2.03442	-2.95058	0.00317183	0.34002	Down
NONMMUG095849.1	36.2307	19.3007	0	23.8321	0	32.903	18.5105	18.9117	18.7111	-0.0302001	1.47939	-0.0204139	0.983713	0.999731	Not DEG
NONMMUG010360.2	286.032	107.857	143.103	294.812	379.029	241.934	178.997	305.258	242.128	-0.768659	0.452453	-1.69887	0.089344	0.999731	Not DEG
NONMMUG066014.1	0	0	0	0	2.82156	0	0	0.940519	0.47026	-2.31429	3.9937	-0.579485	0.562262	NA	Not DEG
NONMMUG003986.2	0	1.13534	0	0	0	0	0.378445	0	0.189223	1.10549	4.08047	0.270923	0.78645	NA	Not DEG
NONMMUG087607.1	2.86032	0	4.00289	3.53069	1.88104	2.9032	2.28774	2.77164	2.52969	-0.269505	2.276	-0.118411	0.905742	NA	Not DEG
NONMMUG058872.1	0	0	0	0	0	1.93547	0	0.645156	0.322578	-1.76457	4.03337	-0.437493	0.661754	NA	Not DEG
NONMMUG040778.2	74.3683	79.4735	68.0492	90.9152	127.911	89.9993	73.9636	102.942	88.4527	-0.47722	0.477287	-0.999861	0.317378	0.999731	Not DEG
NONMMUG013126.2	0	0	5.00361	0	3.76208	6.77414	1.66787	3.51207	2.58997	-1.06813	2.83327	-0.376996	0.706176	NA	Not DEG
NONMMUG024810.2	6.67407	0	0	0	0	0	2.22469	0	1.11235	3.70621	3.9475	0.938875	0.347795	NA	Not DEG
NONMMUG012923.2	56.2529	44.2781	67.0484	32.6588	65.8363	45.4835	55.8598	47.9929	51.9264	0.220576	0.601465	0.366732	0.713819	0.999731	Not DEG
NONMMUG027241.2	16.2085	6.81201	31.0224	10.5921	45.1449	17.4192	18.0143	24.3854	21.1998	-0.433098	0.969844	-0.446564	0.65519	0.999731	Not DEG
NONMMUG040464.3	0	0	0	3.53069	4.7026	0	0	2.74443	1.37221	-3.86141	3.93639	-0.980952	0.326616	NA	Not DEG
NONMMUG049525.2	8.58095	0	12.0087	0	0	0	6.86321	0	3.4316	5.32896	2.80292	1.90122	0.0572737	NA	Not DEG
NONMMUG091946.1	0	4.54134	2.00145	0	3.76208	0.967735	2.18093	1.5766	1.87877	0.463345	2.89045	0.160302	0.872643	NA	Not DEG
NONMMUG013450.2	3.81376	2.27067	2.00145	61.787	127.911	3.87094	2.69529	64.5228	33.6091	-4.57471	1.10531	-4.13884	3.49062e-05	0.0187097	Down
NONMMUG084119.1	13.3481	43.1427	7.00506	9.70939	9.40519	0	21.1653	6.37153	13.7684	1.72563	1.31089	1.31638	0.188047	0.999731	Not DEG
NONMMUG059699.1	0	0	12.0087	0	0	0	4.00289	0	2.00145	4.54999	3.86117	1.17839	0.238639	NA	Not DEG
NONMMUG062385.1	0	3.40601	0	0	0	0	1.13534	0	0.567668	2.71864	3.98713	0.681855	0.495331	NA	Not DEG
NONMMUG020989.2	0.953439	9.08268	20.0145	0	11.2862	3.87094	10.0169	5.05239	7.53462	0.989032	1.68245	0.587852	0.556632	0.999731	Not DEG
NONMMUG039938.2	59.1132	108.992	44.0318	67.083	81.8252	86.1284	70.7124	78.3455	74.529	-0.150041	0.553837	-0.270911	0.786459	0.999731	Not DEG
NONMMUG047361.1	41.9513	63.5788	22.0159	43.2509	39.5018	73.5478	42.5153	52.1002	47.3078	-0.295041	0.66611	-0.442931	0.657816	0.999731	Not DEG
NONMMUG030664.2	0.953439	11.3534	27.0195	15.0054	7.52415	17.4192	13.1088	13.3163	13.2125	-0.0235089	1.22435	-0.0192012	0.984681	0.999731	Not DEG
NONMMUG063105.1	45.7651	47.6841	9.00651	30.8935	49.8475	48.3867	34.1519	43.0426	38.5972	-0.334484	0.767878	-0.435595	0.66313	0.999731	Not DEG
NONMMUG033668.2	1.90688	17.03	0	0	0	13.5483	6.3123	4.51609	5.4142	0.481004	2.3301	0.206431	0.836455	0.999731	Not DEG
NONMMUG058085.1	89.6233	47.6841	69.0499	93.5632	35.7397	29.032	68.7857	52.7783	60.782	0.381742	0.644843	0.591993	0.553856	0.999731	Not DEG
NONMMUG006680.2	0	40.8721	26.0188	18.5361	39.5018	28.0643	22.297	28.7007	25.4988	-0.367659	1.11865	-0.328663	0.74241	0.999731	Not DEG
NONMMUG079306.1	20.9757	32.9247	27.0195	31.7762	5.64312	18.387	26.9733	18.6021	22.7877	0.532996	0.896875	0.594281	0.552324	0.999731	Not DEG
NONMMUG003691.2	2.86032	9.08268	12.0087	0	11.2862	18.387	7.98389	9.89106	8.93748	-0.308382	1.52074	-0.202784	0.839304	0.999731	Not DEG
NONMMUG075138.1	2.86032	0	0	1.76534	1.88104	0	0.953439	1.21546	1.08445	-0.341913	3.89218	-0.087846	0.929999	NA	Not DEG
NONMMUG065811.1	0	0	0	0	3.76208	3.87094	0	2.54434	1.27217	-3.75014	3.93912	-0.952025	0.341084	NA	Not DEG
NONMMUG042938.3	3.81376	0	0	27.3628	6.58363	17.4192	1.27125	17.1219	9.19657	-3.71533	1.62318	-2.28892	0.022084	0.724378	Down
NONMMUG009992.2	46.7185	131.699	74.0535	57.3736	180.58	91.9348	84.157	109.963	97.0598	-0.387612	0.595741	-0.650637	0.515281	0.999731	Not DEG
NONMMUG000281.2	0	0	0	0	0	8.70961	0	2.9032	1.4516	-3.94001	3.93515	-1.00123	0.316713	NA	Not DEG
NONMMUG037382.2	159.224	147.594	164.119	211.841	184.342	157.741	156.979	184.641	170.81	-0.234213	0.387331	-0.604683	0.54539	0.999731	Not DEG
NONMMUG063480.1	4.7672	0	8.00578	8.82671	18.8104	0	4.25766	9.21237	6.73501	-1.10792	1.8574	-0.596487	0.55085	0.999731	Not DEG
NONMMUG025442.2	340.378	326.977	390.282	254.209	347.052	296.127	352.545	299.129	325.837	0.237333	0.341555	0.694861	0.487142	0.999731	Not DEG
NONMMUG017594.2	35.2772	5.67668	12.0087	20.3014	6.58363	31.9352	17.6542	19.6068	18.6305	-0.146111	1.04278	-0.140117	0.888567	0.999731	Not DEG
NONMMUG056962.1	0	22.7067	0	0	2.82156	0	7.5689	0.940519	4.25471	3.00725	2.7555	1.09136	0.275113	NA	Not DEG
NONMMUG040204.2	5.72063	14.7594	5.00361	9.70939	4.7026	9.67735	8.49454	8.02978	8.26216	0.0753907	1.28412	0.0587102	0.953183	0.999731	Not DEG
NONMMUG074677.1	0	0	12.0087	4.41336	6.58363	0	4.00289	3.66566	3.83428	0.128134	2.50635	0.0511236	0.959227	NA	Not DEG
NONMMUG056839.1	17.1619	0	7.00506	1.76534	0	2.9032	8.05565	1.55618	4.80592	2.37728	2.08156	1.14207	0.253427	NA	Not DEG
NONMMUG064230.1	0	0	0	0	0	2.9032	0	0.967735	0.483867	-2.35177	3.99149	-0.589196	0.55573	NA	Not DEG
NONMMUG068647.1	10.4878	21.5714	11.008	0	2.82156	3.87094	14.3557	2.23083	8.29327	2.69386	1.46985	1.83274	0.0668409	0.999731	Not DEG
NONMMUG027999.2	5.72063	0	0	0	17.8699	3.87094	1.90688	7.24693	4.57691	-1.91199	2.37294	-0.805749	0.420388	NA	Not DEG
NONMMUG029635.2	1.90688	0	0	0	0	0	0.635626	0	0.317813	1.90889	4.04654	0.471733	0.637118	NA	Not DEG
NONMMUG077151.1	1.90688	0	0	0	0	0	0.635626	0	0.317813	1.90889	4.04654	0.471733	0.637118	NA	Not DEG
NONMMUG076766.1	0	0	0	2.64801	0	0	0	0.882671	0.441336	-2.23116	3.99879	-0.557959	0.576872	NA	Not DEG
NONMMUG057426.1	0	2.27067	0	4.41336	0	0	0.75689	1.47112	1.114	-0.981023	3.90739	-0.251068	0.801761	NA	Not DEG
NONMMUG002533.2	20.0222	3.40601	17.0123	13.2401	4.7026	15.4838	13.4802	11.1421	12.3112	0.279333	1.1588	0.241053	0.809514	0.999731	Not DEG
NONMMUG085117.1	0	0	0	0	1.88104	0	0	0.627013	0.313506	-1.7287	4.03651	-0.428266	0.668458	NA	Not DEG
NONMMUG075852.1	0	0	0	0	0	3.87094	0	1.29031	0.645156	-2.76799	3.97043	-0.697153	0.485707	NA	Not DEG
NONMMUG094662.1	237.406	224.796	166.12	173.004	215.379	223.547	209.441	203.976	206.709	0.0383215	0.382202	0.100265	0.920134	0.999731	Not DEG
NONMMUG005638.2	4.7672	2.27067	2.00145	1.76534	9.40519	1.93547	3.0131	4.36867	3.69089	-0.531219	1.8483	-0.287409	0.773799	NA	Not DEG
NONMMUG078895.1	0	0	0	0	0	14.516	0	4.83867	2.41934	-4.67746	3.61769	-1.29294	0.196031	NA	Not DEG
NONMMUG019487.2	9.53439	11.3534	10.0072	26.4801	3.76208	10.6451	10.2983	13.6291	11.9637	-0.407379	1.15142	-0.353804	0.723486	0.999731	Not DEG
NONMMUG016592.2	96.2974	89.6915	107.077	117.395	148.602	187.74	97.6887	151.246	124.467	-0.629811	0.436939	-1.44142	0.149467	0.999731	Not DEG
NONMMUG014372.2	0	0	6.00434	0	5.64312	0	2.00145	1.88104	1.94124	0.0927005	3.5307	0.0262555	0.979054	NA	Not DEG
NONMMUG016935.2	22.8825	27.248	0	0	0	3.87094	16.7102	1.29031	9.00025	3.70822	1.9245	1.92685	0.0539981	0.999731	Not DEG
NONMMUG011867.2	5.72063	6.81201	8.00578	14.1227	13.1673	5.80641	6.84614	11.0321	8.93914	-0.690027	1.21862	-0.566236	0.571234	0.999731	Not DEG
NONMMUG078661.2	5.72063	0	7.00506	13.2401	0	2.9032	4.2419	5.38109	4.81149	-0.340602	2.07655	-0.164023	0.869713	NA	Not DEG
NONMMUG009326.2	69.6011	73.7968	68.0492	74.1444	105.338	126.773	70.4823	102.085	86.2838	-0.534086	0.489595	-1.09087	0.275329	0.999731	Not DEG
NONMMUG060543.1	0	3.40601	5.00361	0	2.82156	6.77414	2.80321	3.19857	3.00089	-0.190245	2.41524	-0.0787687	0.937217	NA	Not DEG
NONMMUG095723.1	5.72063	11.3534	3.00217	0.882671	7.52415	9.67735	6.69205	6.02806	6.36005	0.149597	1.52421	0.0981476	0.921815	0.999731	Not DEG
NONMMUG015602.2	37.1841	13.624	17.0123	190.657	37.6208	9.67735	22.6068	79.3184	50.9626	-1.80908	0.908053	-1.99227	0.0463417	0.942703	Down
NONMMUG071745.1	7.62751	0	0	0	0	0	2.5425	0	1.27125	3.89829	3.94245	0.988799	0.322761	NA	Not DEG
NONMMUG022123.2	18.1153	42.0074	18.013	45.0162	13.1673	1.93547	26.0453	20.0397	23.0425	0.373	1.04974	0.355325	0.722346	0.999731	Not DEG
NONMMUG086374.1	21.9291	2.27067	7.00506	14.1227	10.3457	0	10.4016	8.15615	9.27888	0.352748	1.53115	0.230381	0.817796	0.999731	Not DEG
NONMMUG075516.1	2.86032	6.81201	0	0	0	2.9032	3.22411	0.967735	2.09592	1.74055	3.06077	0.568663	0.569585	NA	Not DEG
NONMMUG069102.1	3.81376	0	14.0101	0	0	0	5.94129	0	2.97065	5.12044	2.96746	1.72553	0.0844319	NA	Not DEG
NONMMUG093480.1	0	0	0	2.64801	9.40519	0	0	4.01774	2.00887	-4.41068	3.41775	-1.29052	0.19687	NA	Not DEG
NONMMUG035455.2	5.72063	6.81201	11.008	13.2401	11.2862	3.87094	7.84687	9.46575	8.65631	-0.272116	1.25849	-0.216224	0.828813	0.999731	Not DEG
NONMMUG021198.2	77.2286	137.376	55.0398	90.9152	75.2415	34.8384	89.8813	66.9984	78.4398	0.421299	0.593133	0.710294	0.477522	0.999731	Not DEG
NONMMUG058565.1	0	0	0	0	0	27.0966	0	9.03219	4.51609	-5.57814	2.96351	-1.88227	0.059799	NA	Not DEG
NONMMUG047395.1	0	0	13.0094	0	0	0	4.33647	0	2.16823	4.66545	3.75045	1.24397	0.213511	NA	Not DEG
NONMMUG054861.1	0	0	20.0145	7.06137	24.4535	7.74188	6.67149	13.0856	9.87853	-0.968662	1.69199	-0.572499	0.566984	0.999731	Not DEG
NONMMUG089147.1	0	18.1654	0	0	8.46467	0	6.05512	2.82156	4.43834	1.09783	2.72091	0.40348	0.686595	NA	Not DEG
NONMMUG000654.2	759.891	779.975	624.451	721.143	660.244	616.447	721.439	665.945	693.692	0.115317	0.302587	0.381102	0.703127	0.999731	Not DEG
NONMMUG034272.2	58.1598	45.4134	65.047	61.787	53.6096	58.0641	56.2067	57.8202	57.0135	-0.0399131	0.550311	-0.0725282	0.942182	0.999731	Not DEG
NONMMUG053169.1	0	10.218	5.00361	0	0	0	5.07388	0	2.53694	4.88817	3.12856	1.56244	0.118185	NA	Not DEG
NONMMUG020207.2	60.0667	31.7894	36.026	36.1895	25.394	33.8707	42.6274	31.8181	37.2227	0.423503	0.674216	0.628141	0.529911	0.999731	Not DEG
NONMMUG084580.1	0	0	3.00217	0	0	0	1.00072	0	0.500361	2.55269	3.99681	0.638681	0.52303	NA	Not DEG
NONMMUG064345.1	0	0	0	0	14.1078	0	0	4.7026	2.3513	-4.63726	3.65267	-1.26955	0.204244	NA	Not DEG
NONMMUG071119.1	0	0	0	0	0	3.87094	0	1.29031	0.645156	-2.76799	3.97043	-0.697153	0.485707	NA	Not DEG
NONMMUG034835.2	7.62751	22.7067	0	7.06137	15.0483	19.3547	10.1114	13.8215	11.9664	-0.45616	1.36623	-0.333881	0.738469	0.999731	Not DEG
NONMMUG094815.1	0	0	0	0	0	2.9032	0	0.967735	0.483867	-2.35177	3.99149	-0.589196	0.55573	NA	Not DEG
NONMMUG082780.1	0	0	0	0	0	7.74188	0	2.58063	1.29031	-3.76987	3.93869	-0.957138	0.338498	NA	Not DEG
NONMMUG020386.2	30.5101	89.6915	18.013	9.70939	3.76208	27.0966	46.0715	13.5227	29.7971	1.76841	0.940527	1.88023	0.0600768	0.999731	Not DEG
NONMMUG054569.1	13.3481	48.8194	22.0159	18.5361	10.3457	23.2256	28.0612	17.3691	22.7152	0.688474	0.886272	0.77682	0.437265	0.999731	Not DEG
NONMMUG056352.1	7.62751	4.54134	4.00289	0	2.82156	1.93547	5.39058	1.58568	3.48813	1.77288	2.02365	0.876083	0.380985	NA	Not DEG
NONMMUG043095.2	20.0222	12.4887	65.047	7.06137	19.7509	20.3224	32.5193	15.7116	24.1154	1.05292	0.933553	1.12787	0.259376	0.999731	Not DEG
NONMMUG038385.2	0	0	0	0	0	3.87094	0	1.29031	0.645156	-2.76799	3.97043	-0.697153	0.485707	NA	Not DEG
NONMMUG014826.2	5.72063	15.8947	13.0094	56.491	59.2527	25.1611	11.5416	46.9683	29.2549	-2.03156	0.809911	-2.50837	0.012129	0.592364	Down
NONMMUG063299.1	2.86032	0	19.0137	1.76534	0	0	7.29135	0.588448	3.9399	3.6114	2.53442	1.42494	0.154173	NA	Not DEG
NONMMUG011036.2	23.836	4.54134	7.00506	4.41336	4.7026	20.3224	11.7941	9.81279	10.8035	0.272545	1.26529	0.215402	0.829454	0.999731	Not DEG
NONMMUG044835.2	0	2.27067	3.00217	0	7.52415	0	1.75761	2.50805	2.13283	-0.515512	3.06562	-0.168159	0.866458	NA	Not DEG
NONMMUG080869.1	53.3926	20.436	25.0181	8.82671	0	20.3224	32.9489	9.71638	21.3326	1.76486	1.13306	1.55761	0.119326	0.999731	Not DEG
NONMMUG005472.2	54.346	51.0901	10.0072	28.2455	30.0966	8.70961	38.4811	22.3506	30.4158	0.782058	0.875413	0.89336	0.371665	0.999731	Not DEG
NONMMUG094660.1	16.2085	2.27067	9.00651	7.94404	9.40519	7.74188	9.16188	8.3637	8.76279	0.137565	1.28467	0.107082	0.914724	0.999731	Not DEG
NONMMUG043610.2	39.091	45.4134	77.0557	83.8538	76.1821	5.80641	53.8534	55.2807	54.5671	-0.038584	0.811608	-0.0475402	0.962083	0.999731	Not DEG
NONMMUG074782.1	17.1619	10.218	10.0072	19.4188	4.7026	6.77414	12.4624	10.2985	11.3804	0.273898	1.14784	0.23862	0.811401	0.999731	Not DEG
NONMMUG056777.1	0	18.1654	0	0	7.52415	0	6.05512	2.50805	4.28159	1.26793	2.74681	0.4616	0.644368	NA	Not DEG
NONMMUG094163.1	0	21.5714	15.0108	7.94404	6.58363	0	12.1941	4.84256	8.51832	1.32669	1.73923	0.7628	0.445583	0.999731	Not DEG
NONMMUG095808.1	0	3.40601	4.00289	0	3.76208	0	2.46963	1.25403	1.86183	0.97663	3.18853	0.306295	0.75938	NA	Not DEG
NONMMUG000575.2	0	0	0	0	0	11.6128	0	3.87094	1.93547	-4.35547	3.91835	-1.11156	0.266329	NA	Not DEG
NONMMUG015682.2	29.5566	0	10.0072	0	13.1673	15.4838	13.1879	9.55034	11.3691	0.47119	1.63784	0.287689	0.773585	0.999731	Not DEG
NONMMUG066753.2	43.8582	52.2254	41.0296	18.5361	57.3717	28.0643	45.7044	34.6574	40.1809	0.399399	0.693929	0.575562	0.564911	0.999731	Not DEG
NONMMUG037739.2	0	3.40601	13.0094	0	8.46467	30.9675	5.4718	13.1441	9.30793	-1.26262	1.76682	-0.714629	0.474838	0.999731	Not DEG
NONMMUG003328.2	20.9757	39.7367	31.0224	15.8881	37.6208	9.67735	30.5783	21.0621	25.8202	0.536136	0.843931	0.635284	0.525243	0.999731	Not DEG
NONMMUG059511.1	0	0	0	2.64801	0	0	0	0.882671	0.441336	-2.23116	3.99879	-0.557959	0.576872	NA	Not DEG
NONMMUG009241.2	0	0	0	0	0	1.93547	0	0.645156	0.322578	-1.76457	4.03337	-0.437493	0.661754	NA	Not DEG
NONMMUG037057.2	35.2772	57.9021	48.0347	20.3014	72.42	72.5801	47.0713	55.1005	51.0859	-0.227324	0.674318	-0.337118	0.736028	0.999731	Not DEG
NONMMUG086509.1	4.7672	0	3.00217	2.64801	0	0	2.58979	0.882671	1.73623	1.54758	3.26309	0.474269	0.635308	NA	Not DEG
NONMMUG052762.1	0	0	0	18.5361	0	0	0	6.1787	3.08935	-5.03305	3.32619	-1.51316	0.13024	NA	Not DEG
NONMMUG032042.2	37.1841	71.5261	24.0173	22.9495	98.7545	14.516	44.2425	45.4067	44.8246	-0.0392586	0.822318	-0.0477414	0.961922	0.999731	Not DEG
NONMMUG041258.2	7.62751	77.2028	198.143	116.513	79.0036	106.451	94.3245	100.656	97.4901	-0.0940319	0.774514	-0.121408	0.903368	0.999731	Not DEG
NONMMUG002424.2	0.953439	1.13534	3.00217	1.76534	3.76208	1.93547	1.69698	2.48763	2.09231	-0.54954	2.28356	-0.240651	0.809826	NA	Not DEG
NONMMUG043978.2	29.5566	44.2781	65.047	11.4747	53.6096	51.2899	46.2939	38.7914	42.5427	0.256309	0.750003	0.341744	0.732544	0.999731	Not DEG
NONMMUG053141.1	10.4878	15.8947	17.0123	7.06137	14.1078	7.74188	14.4649	9.63701	12.051	0.585432	1.06809	0.548113	0.583614	0.999731	Not DEG
NONMMUG020209.2	43.8582	51.0901	10.0072	38.8375	7.52415	32.903	34.9852	26.4216	30.7034	0.40318	0.89168	0.452158	0.651155	0.999731	Not DEG
NONMMUG007271.2	69.6011	53.3608	44.0318	80.3231	63.9553	44.5158	55.6645	62.9314	59.298	-0.177169	0.569795	-0.310935	0.75585	0.999731	Not DEG
NONMMUG063832.1	0	3.40601	0	0	0	0	1.13534	0	0.567668	2.71864	3.98713	0.681855	0.495331	NA	Not DEG
NONMMUG082069.2	3.81376	0	0	0	0	0	1.27125	0	0.635626	2.90211	3.97762	0.729611	0.465628	NA	Not DEG
NONMMUG086792.1	3.81376	2.27067	2.00145	14.1227	10.3457	14.516	2.69529	12.9948	7.84506	-2.26446	1.33958	-1.69043	0.0909463	0.999731	Not DEG
NONMMUG073504.1	6.67407	27.248	9.00651	0	0	0	14.3095	0	7.15477	6.3842	1.98247	3.22033	0.00128044	0.220641	Up
NONMMUG038801.2	23.836	40.8721	9.00651	7.94404	45.1449	14.516	24.5715	22.535	23.5533	0.123071	0.965038	0.127529	0.898521	0.999731	Not DEG
NONMMUG034928.2	40.9979	20.436	37.0267	14.1227	15.9888	18.387	32.8202	16.1662	24.4932	1.02437	0.795036	1.28846	0.197586	0.999731	Not DEG
NONMMUG008968.2	0	0	5.00361	15.0054	5.64312	30.9675	1.66787	17.2053	9.43661	-3.3554	1.62495	-2.06493	0.0389297	0.909069	Down
NONMMUG029082.2	5.72063	0	0	9.70939	3.76208	33.8707	1.90688	15.7807	8.8438	-3.0237	1.70033	-1.7783	0.0753541	0.999731	Not DEG
NONMMUG043785.2	0	3.40601	0	0	0	0	1.13534	0	0.567668	2.71864	3.98713	0.681855	0.495331	NA	Not DEG
NONMMUG040815.2	3.81376	2.27067	9.00651	15.8881	4.7026	13.5483	5.03031	11.3797	8.20498	-1.17401	1.33649	-0.878431	0.37971	0.999731	Not DEG
NONMMUG096052.1	7.62751	0	0	0	2.82156	0	2.5425	0.940519	1.74151	1.44086	3.67445	0.392129	0.694963	NA	Not DEG
NONMMUG047161.1	10.4878	12.4887	25.0181	23.8321	20.6914	11.6128	15.9982	18.7121	17.3552	-0.226529	0.939923	-0.241008	0.809549	0.999731	Not DEG
NONMMUG025896.2	10.4878	0	1.00072	3.53069	5.64312	3.87094	3.82952	4.34825	4.08888	-0.17351	1.98051	-0.087609	0.930187	NA	Not DEG
NONMMUG067874.1	6.67407	20.436	2.00145	0	0	0	9.70385	0	4.85193	5.82359	2.27925	2.55505	0.0106172	NA	Up
NONMMUG012766.2	0	1.13534	5.00361	0	2.82156	3.87094	2.04632	2.23083	2.13857	-0.120928	2.7511	-0.0439563	0.964939	NA	Not DEG
NONMMUG075319.2	14.3016	0	3.00217	8.82671	4.7026	2.9032	5.76792	5.4775	5.62271	0.0802134	1.75758	0.0456385	0.963598	0.999731	Not DEG
NONMMUG029722.2	3.81376	7.94735	13.0094	9.70939	16.9293	22.2579	8.25683	16.2989	12.2779	-0.981271	1.10449	-0.888442	0.374303	0.999731	Not DEG
NONMMUG012330.2	61.9735	38.6014	37.0267	57.3736	39.5018	46.4513	45.8672	47.7756	46.8214	-0.0578131	0.613007	-0.0943108	0.924862	0.999731	Not DEG
NONMMUG064573.1	0	0	0	0	0	3.87094	0	1.29031	0.645156	-2.76799	3.97043	-0.697153	0.485707	NA	Not DEG
NONMMUG073882.1	2.86032	28.3834	13.0094	4.41336	2.82156	23.2256	14.751	10.1535	12.4523	0.536993	1.27919	0.419792	0.674638	0.999731	Not DEG
NONMMUG042272.2	124.901	99.9095	106.077	94.4458	133.554	84.1929	110.296	104.064	107.18	0.0844532	0.457564	0.184571	0.853565	0.999731	Not DEG
NONMMUG037651.2	0.953439	0	1.00072	9.70939	6.58363	0.967735	0.651387	5.75358	3.20249	-3.1195	2.27054	-1.3739	0.169472	NA	Not DEG
NONMMUG059591.1	3.81376	0	0	0	0	0	1.27125	0	0.635626	2.90211	3.97762	0.729611	0.465628	NA	Not DEG
NONMMUG005023.2	90.5767	30.6541	77.0557	81.2058	71.4795	78.3865	66.0955	77.0239	71.5597	-0.218106	0.573486	-0.380316	0.703711	0.999731	Not DEG
NONMMUG063654.1	0	0	3.00217	0	0	14.516	1.00072	4.83867	2.9197	-2.26623	3.09129	-0.733102	0.463496	NA	Not DEG
NONMMUG025206.2	78.182	28.3834	27.0195	36.1895	46.0854	59.9995	44.5283	47.4248	45.9766	-0.0876059	0.684716	-0.127945	0.898193	0.999731	Not DEG
NONMMUG065128.1	3.81376	2.27067	6.00434	0.882671	0	0.967735	4.02959	0.616802	2.32319	2.70796	2.45701	1.10213	0.270403	NA	Not DEG
NONMMUG085299.2	1.90688	0	0	0	0	0	0.635626	0	0.317813	1.90889	4.04654	0.471733	0.637118	NA	Not DEG
NONMMUG050712.1	15.255	0	3.00217	8.82671	0	0.967735	6.08573	3.26482	4.67527	0.89827	2.17277	0.413422	0.679298	NA	Not DEG
NONMMUG005044.2	5.72063	10.218	5.00361	24.7148	2.82156	0.967735	6.98076	9.50136	8.24106	-0.451606	1.47866	-0.305415	0.76005	0.999731	Not DEG
NONMMUG022253.2	0	0	6.00434	3.53069	0	0	2.00145	1.1769	1.58917	0.762542	3.79437	0.200967	0.840724	NA	Not DEG
NONMMUG036306.2	10.4878	3.40601	5.00361	1.76534	6.58363	1.93547	6.29915	3.42815	4.86365	0.882658	1.63805	0.538846	0.589993	NA	Not DEG
NONMMUG040197.2	12.3947	5.67668	0	7.94404	0	0	6.0238	2.64801	4.3359	1.18081	2.40149	0.491699	0.622932	NA	Not DEG
NONMMUG005491.2	5.72063	15.8947	16.0116	40.6029	30.0966	15.4838	12.5423	28.7278	20.635	-1.20051	0.911138	-1.3176	0.187638	0.999731	Not DEG
NONMMUG065673.1	3.81376	0	0	0	0	0	1.27125	0	0.635626	2.90211	3.97762	0.729611	0.465628	NA	Not DEG
NONMMUG038829.2	153.504	98.7742	120.087	102.39	103.457	110.322	124.122	105.39	114.756	0.237184	0.441317	0.537445	0.59096	0.999731	Not DEG
NONMMUG025044.2	0	1.13534	0	0	26.3345	0.967735	0.378445	9.10076	4.7396	-4.6279	2.53063	-1.82875	0.0674367	NA	Not DEG
NONMMUG070316.1	2.86032	0	6.00434	0	0	3.87094	2.95488	1.29031	2.1226	1.20486	3.03732	0.396683	0.691601	NA	Not DEG
NONMMUG059476.1	0	0	0	7.06137	7.52415	0	0	4.86184	2.43092	-4.68652	3.16593	-1.4803	0.138794	NA	Not DEG
NONMMUG047402.1	0.953439	0	0	0.882671	0	0.967735	0.317813	0.616802	0.467308	-0.745969	4.03837	-0.18472	0.853449	NA	Not DEG
NONMMUG067437.1	10.4878	17.03	0	4.41336	0	0	9.17262	1.47112	5.32187	2.62663	2.22903	1.17837	0.238648	0.999731	Not DEG
NONMMUG038136.2	501.509	215.714	293.212	211.841	155.186	178.063	336.811	181.697	259.254	0.891004	0.421646	2.11316	0.0345872	0.875068	Up
NONMMUG057512.1	0	0	0	0	0	0.967735	0	0.322578	0.161289	-0.818059	4.08047	-0.200481	0.841104	NA	Not DEG
NONMMUG032014.2	0	0	0	20.3014	0	0	0	6.76715	3.38357	-5.16426	3.22973	-1.59898	0.109826	NA	Not DEG
NONMMUG010590.2	153.504	168.03	164.119	133.283	98.7545	120.967	161.884	117.668	139.776	0.459814	0.408449	1.12575	0.260269	0.999731	Not DEG
NONMMUG058028.1	0	3.40601	0	0	0	0	1.13534	0	0.567668	2.71864	3.98713	0.681855	0.495331	NA	Not DEG
NONMMUG088336.1	0	6.81201	0	0	5.64312	0	2.27067	1.88104	2.07585	0.26465	3.45355	0.0766313	0.938917	NA	Not DEG
NONMMUG080177.2	27.6497	2.27067	13.0094	5.29603	3.76208	25.1611	14.3099	11.4064	12.8582	0.334118	1.26135	0.264889	0.791095	0.999731	Not DEG
NONMMUG079421.1	14.3016	7.94735	0	12.3574	32.9182	21.2902	7.41631	22.1886	14.8024	-1.57856	1.23389	-1.27934	0.200777	0.999731	Not DEG
NONMMUG081817.1	0	0	0	0	0	3.87094	0	1.29031	0.645156	-2.76799	3.97043	-0.697153	0.485707	NA	Not DEG
NONMMUG015463.2	5.72063	6.81201	25.0181	30.0108	15.0483	0	12.5169	15.0197	13.7683	-0.264009	1.36735	-0.193081	0.846896	0.999731	Not DEG
NONMMUG051264.1	7.62751	24.9774	15.0108	8.82671	22.5725	23.2256	15.8719	18.2083	17.0401	-0.201098	0.978891	-0.205435	0.837232	0.999731	Not DEG
NONMMUG048693.1	0	0	0	0	0	4.83867	0	1.61289	0.806445	-3.09066	3.95775	-0.780912	0.434854	NA	Not DEG
NONMMUG023195.2	0	0	8.00578	0	0	0	2.66859	0	1.3343	3.96548	3.94083	1.00625	0.314294	NA	Not DEG
NONMMUG028495.2	1.90688	0	0	0	0	1.93547	0.635626	0.645156	0.640391	0.000600929	3.99904	0.000150268	0.99988	NA	Not DEG
NONMMUG042060.2	66.7407	120.346	97.0701	57.3736	92.1709	110.322	94.7188	86.6221	90.6704	0.128364	0.514915	0.249291	0.803136	0.999731	Not DEG
NONMMUG016466.2	44.8116	55.6314	109.079	3.53069	77.1226	59.0318	69.8406	46.5617	58.2012	0.586295	0.840225	0.697782	0.485313	0.999731	Not DEG
NONMMUG069595.1	16.2085	2.27067	24.0173	13.2401	5.64312	6.77414	14.1655	8.55244	11.359	0.729868	1.22131	0.597611	0.550099	0.999731	Not DEG
NONMMUG047517.1	27.6497	32.9247	18.013	21.1841	0	0	26.1958	7.06137	16.6286	1.88455	1.43194	1.31608	0.188148	0.999731	Not DEG
NONMMUG042736.3	21.9291	18.1654	16.0116	14.1227	10.3457	22.2579	18.702	15.5754	17.1387	0.265301	0.916655	0.289423	0.772258	0.999731	Not DEG
NONMMUG041014.2	0	0	0	0	0	17.4192	0	5.80641	2.9032	-4.94056	3.39946	-1.45334	0.146131	NA	Not DEG
NONMMUG049915.1	5.72063	21.5714	2.00145	6.1787	8.46467	7.74188	9.76448	7.46175	8.61312	0.381605	1.34397	0.28394	0.776457	0.999731	Not DEG
NONMMUG085981.1	0	0	0	0	0	22.2579	0	7.4193	3.70965	-5.29428	3.14281	-1.68457	0.0920723	NA	Not DEG
NONMMUG064987.1	4.7672	4.54134	8.00578	2.64801	1.88104	0	5.77144	1.50968	3.64056	1.92799	1.98495	0.971305	0.331396	NA	Not DEG
NONMMUG025553.2	0	42.0074	0	0	0	0	14.0025	0	7.00123	6.35283	2.63159	2.41406	0.0157758	0.638848	Up
NONMMUG027462.2	19.0688	15.8947	23.0166	11.4747	32.9182	20.3224	19.3267	21.5718	20.4492	-0.156469	0.874461	-0.178932	0.857991	0.999731	Not DEG
NONMMUG070489.1	0	0	0	0	0	1.93547	0	0.645156	0.322578	-1.76457	4.03337	-0.437493	0.661754	NA	Not DEG
NONMMUG042711.2	36.2307	5.67668	3.00217	138.579	33.8587	55.1609	14.9698	75.8663	45.4181	-2.3343	0.908193	-2.57026	0.0101621	0.545958	Down
NONMMUG000400.2	0.953439	1.13534	3.00217	2.64801	1.88104	16.4515	1.69698	6.99351	4.34525	-2.03842	1.84936	-1.10223	0.270362	NA	Not DEG
NONMMUG073453.1	8.58095	0	4.00289	8.82671	6.58363	0	4.19461	5.13678	4.6657	-0.287708	2.06703	-0.139189	0.889301	NA	Not DEG
NONMMUG076925.1	18.1153	7.94735	30.0217	37.0722	4.7026	5.80641	18.6948	15.8604	17.2776	0.236176	1.10847	0.213065	0.831276	0.999731	Not DEG
NONMMUG025647.2	0	0	0	1.76534	0	0	0	0.588448	0.294224	-1.64922	4.04373	-0.407847	0.683386	NA	Not DEG
NONMMUG093750.1	7.62751	40.8721	8.00578	4.41336	26.3345	0	18.8351	10.2493	14.5422	0.874639	1.389	0.629688	0.528899	0.999731	Not DEG
NONMMUG090411.1	0	0	0	0	0	7.74188	0	2.58063	1.29031	-3.76987	3.93869	-0.957138	0.338498	NA	Not DEG
NONMMUG035673.2	62.927	40.8721	49.0354	69.731	66.7769	60.9673	50.9448	65.8251	58.3849	-0.368279	0.54991	-0.669708	0.503044	0.999731	Not DEG
NONMMUG048532.1	0	0	12.0087	0	0	0	4.00289	0	2.00145	4.54999	3.86117	1.17839	0.238639	NA	Not DEG
NONMMUG053777.2	0.953439	0	2.00145	0	15.0483	7.74188	0.984962	7.59673	4.29084	-2.93035	2.21725	-1.32161	0.186297	NA	Not DEG
NONMMUG081398.1	12.3947	0	0	7.94404	0	0	4.13157	2.64801	3.38979	0.641958	2.93373	0.218819	0.826791	NA	Not DEG
NONMMUG090163.1	60.0667	15.8947	13.0094	15.0054	10.3457	33.8707	29.6569	19.7406	24.6988	0.59138	0.932405	0.634252	0.525916	0.999731	Not DEG
NONMMUG029357.3	37.1841	29.5187	60.0434	22.0668	14.1078	26.1288	42.2487	20.7678	31.5083	1.02579	0.7358	1.39412	0.163282	0.999731	Not DEG
NONMMUG074861.1	4.7672	3.40601	4.00289	4.41336	1.88104	7.74188	4.0587	4.67876	4.36873	-0.202267	1.6651	-0.121475	0.903315	NA	Not DEG
NONMMUG088390.1	28.6032	3.40601	5.00361	8.82671	29.1561	13.5483	12.3376	17.177	14.7573	-0.470416	1.15518	-0.407224	0.683843	0.999731	Not DEG
NONMMUG044096.2	44.8116	63.5788	14.0101	12.3574	66.7769	46.4513	40.8002	41.8618	41.331	-0.03773	0.813764	-0.0463648	0.963019	0.999731	Not DEG
NONMMUG088431.1	0.953439	0	0	0	0	0	0.317813	0	0.158907	1.10549	4.08047	0.270923	0.78645	NA	Not DEG
NONMMUG013381.2	15.255	24.9774	26.0188	22.9495	46.0854	40.6448	22.0837	36.5599	29.3218	-0.728147	0.750667	-0.970001	0.332046	0.999731	Not DEG
NONMMUG080273.1	3.81376	4.54134	5.00361	14.1227	10.3457	7.74188	4.4529	10.7368	7.59484	-1.27153	1.30498	-0.974369	0.329873	0.999731	Not DEG
NONMMUG017718.2	36.2307	10.218	25.0181	0	19.7509	30.9675	23.8223	16.9061	20.3642	0.498954	1.19868	0.416252	0.677226	0.999731	Not DEG
NONMMUG076192.1	29.5566	40.8721	48.0347	24.7148	47.9665	22.2579	39.4878	31.6464	35.5671	0.318992	0.702967	0.453779	0.649988	0.999731	Not DEG
NONMMUG081213.1	0.953439	0	0	0.882671	0	1.93547	0.317813	0.93938	0.628597	-1.3507	3.9938	-0.338198	0.735214	NA	Not DEG
NONMMUG041675.2	34.3238	0	0	2.64801	0	0	11.4413	0.882671	6.16197	3.68299	2.48415	1.4826	0.138181	0.999731	Not DEG
NONMMUG080329.1	10.4878	2.27067	10.0072	21.1841	4.7026	6.77414	7.58858	10.887	9.23776	-0.51745	1.30401	-0.396814	0.691504	0.999731	Not DEG
NONMMUG071227.1	0	12.4887	0	0	0	0	4.1629	0	2.08145	4.60165	3.81174	1.20723	0.227343	NA	Not DEG
NONMMUG068566.1	3.81376	0	0	0	0	5.80641	1.27125	1.93547	1.60336	-0.595474	3.78558	-0.157301	0.875008	NA	Not DEG
NONMMUG027510.2	109.645	80.6088	204.147	164.177	247.357	204.192	131.467	205.242	168.355	-0.64144	0.468005	-1.37058	0.170505	0.999731	Not DEG
NONMMUG064446.1	0	0	0	1.76534	0	2.9032	0	1.55618	0.778091	-3.04174	3.9595	-0.768213	0.442361	NA	Not DEG
NONMMUG012522.2	48.6254	115.804	41.0296	26.4801	36.6802	60.9673	68.4864	41.3759	54.9311	0.725859	0.662987	1.09483	0.273591	0.999731	Not DEG
NONMMUG077775.1	0	4.54134	0	0.882671	0.940519	0.967735	1.51378	0.930308	1.22204	0.690482	3.43827	0.200822	0.840837	NA	Not DEG
NONMMUG068447.1	3.81376	0	0	0	0	0	1.27125	0	0.635626	2.90211	3.97762	0.729611	0.465628	NA	Not DEG
NONMMUG056089.1	1.90688	0	0	0	0	0	0.635626	0	0.317813	1.90889	4.04654	0.471733	0.637118	NA	Not DEG
NONMMUG091682.1	47.672	73.7968	100.072	66.2004	8.46467	108.386	73.847	61.0171	67.4321	0.275371	0.759202	0.362711	0.71682	0.999731	Not DEG
NONMMUG023763.2	1.90688	34.0601	6.00434	23.8321	21.6319	11.6128	13.9904	19.0256	16.508	-0.452647	1.14389	-0.395709	0.69232	0.999731	Not DEG
NONMMUG007719.2	23.836	905.998	108.078	45.0162	24.4535	23.2256	345.971	30.8985	188.434	3.48432	1.29652	2.68744	0.0072001	0.482407	Up
NONMMUG067300.1	0	2.27067	0	0	0	3.87094	0.75689	1.29031	1.0236	-0.783536	3.91559	-0.200107	0.841397	NA	Not DEG
NONMMUG046211.2	26.6963	44.2781	46.0332	30.8935	33.8587	35.8062	39.0025	33.5195	36.261	0.217576	0.666711	0.326343	0.744165	0.999731	Not DEG
NONMMUG083075.2	0.953439	0	8.00578	0.882671	7.52415	6.77414	2.98641	5.06032	4.02336	-0.753723	2.04351	-0.368837	0.71225	NA	Not DEG
NONMMUG015736.2	1392.02	1435.06	1539.11	1375.2	1584.77	1359.67	1455.4	1439.88	1447.64	0.0154705	0.279506	0.0553494	0.95586	0.999731	Not DEG
NONMMUG073750.1	0	0	0	2.64801	0	0	0	0.882671	0.441336	-2.23116	3.99879	-0.557959	0.576872	NA	Not DEG
NONMMUG005787.2	0	2.27067	0	0	0	0	0.75689	0	0.378445	2.12818	4.02714	0.528459	0.597181	NA	Not DEG
NONMMUG065719.1	5.72063	1.13534	2.00145	5.29603	12.2267	0	2.95247	5.84093	4.3967	-0.97774	1.95665	-0.499701	0.617286	NA	Not DEG
NONMMUG018030.2	16.2085	12.4887	9.00651	8.82671	9.40519	3.87094	12.5679	7.36761	9.96775	0.76948	1.16884	0.65833	0.510326	0.999731	Not DEG
NONMMUG083354.1	0	7.94735	0	0	0	2.9032	2.64912	0.967735	1.80843	1.45228	3.63322	0.399722	0.689361	NA	Not DEG
NONMMUG039378.2	13.3481	0	8.00578	4.41336	0	0	7.11798	1.47112	4.29455	2.26688	2.37623	0.953984	0.340092	NA	Not DEG
NONMMUG012282.2	0	0	0	0	0.940519	0	0	0.313506	0.156753	-0.818059	4.08047	-0.200481	0.841104	NA	Not DEG
NONMMUG013078.2	61.0201	29.5187	39.0282	26.4801	51.7286	35.8062	43.189	38.005	40.597	0.187215	0.672674	0.278315	0.780771	0.999731	Not DEG
NONMMUG085554.1	0	0	11.008	0	1.88104	3.87094	3.66932	1.91733	2.79332	0.9422	2.8005	0.336439	0.73654	NA	Not DEG
NONMMUG007028.3	5.72063	37.4661	0	15.0054	0	0	14.3956	5.0018	9.69869	1.51741	1.98183	0.765664	0.443876	0.999731	Not DEG
NONMMUG041413.2	3.81376	4.54134	9.00651	3.53069	17.8699	11.6128	5.7872	11.0045	8.39583	-0.924866	1.31626	-0.702647	0.482276	0.999731	Not DEG
NONMMUG004664.2	0	0	0	0	0	2.9032	0	0.967735	0.483867	-2.35177	3.99149	-0.589196	0.55573	NA	Not DEG
NONMMUG051637.1	0	7.94735	0	0	0	0	2.64912	0	1.32456	3.94785	3.94125	1.00168	0.316501	NA	Not DEG
NONMMUG019767.2	1.90688	0	11.008	0	2.82156	0	4.30494	0.940519	2.62273	2.1992	2.85135	0.771285	0.440538	NA	Not DEG
NONMMUG055806.1	0	4.54134	0	14.1227	0	0	1.51378	4.70758	3.11068	-1.65399	3.02247	-0.547231	0.58422	NA	Not DEG
NONMMUG057928.1	0	0	0	2.64801	0	0	0	0.882671	0.441336	-2.23116	3.99879	-0.557959	0.576872	NA	Not DEG
NONMMUG084569.1	0.953439	0	0	0	0	0	0.317813	0	0.158907	1.10549	4.08047	0.270923	0.78645	NA	Not DEG
NONMMUG042632.3	128.714	84.0148	107.077	99.7419	113.803	102.58	106.602	105.375	105.988	0.0179523	0.451202	0.0397876	0.968262	0.999731	Not DEG
NONMMUG039544.2	0	0	3.00217	0	0	0	1.00072	0	0.500361	2.55269	3.99681	0.638681	0.52303	NA	Not DEG
NONMMUG058177.1	0	0	0	3.53069	0	0	0	1.1769	0.588448	-2.64457	3.97606	-0.665123	0.505972	NA	Not DEG
NONMMUG080564.1	0	4.54134	9.00651	0	0	23.2256	4.51595	7.74188	6.12891	-0.777082	2.23177	-0.348191	0.727697	0.999731	Not DEG
NONMMUG022910.2	85.8095	80.6088	104.075	51.1949	70.5389	91.9348	90.1645	71.2229	80.6937	0.341442	0.506978	0.673486	0.500638	0.999731	Not DEG
NONMMUG002694.2	0	0	3.00217	0	0	0	1.00072	0	0.500361	2.55269	3.99681	0.638681	0.52303	NA	Not DEG
NONMMUG057607.1	7.62751	2.27067	3.00217	4.41336	6.58363	1.93547	4.30012	4.31082	4.30547	0.000854505	1.69928	0.000502864	0.999599	NA	Not DEG
NONMMUG044425.2	251.708	315.623	349.252	346.89	298.145	277.74	305.528	307.591	306.56	-0.01012	0.348674	-0.0290243	0.976845	0.999731	Not DEG
NONMMUG092994.1	18.1153	13.624	3.00217	0.882671	10.3457	8.70961	11.5805	6.646	9.11325	0.80432	1.37419	0.585306	0.558342	0.999731	Not DEG
NONMMUG004868.2	20.0222	14.7594	12.0087	6.1787	7.52415	13.5483	15.5968	9.08371	12.3402	0.782726	1.06298	0.736348	0.461519	0.999731	Not DEG
NONMMUG016553.2	69.6011	85.1501	64.0463	101.507	54.5501	81.2897	72.9325	79.1157	76.0241	-0.118717	0.520718	-0.227987	0.819656	0.999731	Not DEG
NONMMUG039772.2	1779.12	1873.3	1740.26	1827.13	1471.91	1918.05	1797.56	1739.03	1768.29	0.0477272	0.283396	0.168412	0.866259	0.999731	Not DEG
NONMMUG075719.1	0	0	2.00145	24.7148	2.82156	0	0.667149	9.17879	4.92297	-3.77199	2.39783	-1.57308	0.1157	NA	Not DEG
NONMMUG012976.2	0	2.27067	0	0	3.76208	0	0.75689	1.25403	1.00546	-0.745196	3.91732	-0.190231	0.849128	NA	Not DEG
NONMMUG050645.1	0	0	0	3.53069	0	0	0	1.1769	0.588448	-2.64457	3.97606	-0.665123	0.505972	NA	Not DEG
NONMMUG065317.1	0	2.27067	15.0108	0	17.8699	1.93547	5.7605	6.60178	6.18114	-0.194761	2.03215	-0.0958397	0.923648	0.999731	Not DEG
NONMMUG018802.2	21.9291	43.1427	42.0304	52.9603	52.6691	70.6446	35.7007	58.758	47.2294	-0.720685	0.621552	-1.15949	0.246255	0.999731	Not DEG
NONMMUG022782.2	51.4857	63.5788	83.06	70.6137	67.7174	68.7091	66.0415	69.0134	67.5275	-0.063757	0.523947	-0.121686	0.903148	0.999731	Not DEG
NONMMUG008582.3	48.6254	46.5487	18.013	17.6534	2.82156	6.77414	37.7291	9.08304	23.406	2.04929	0.945811	2.1667	0.0302579	0.841236	Up
NONMMUG045703.2	6.67407	1.13534	0	1.76534	0.940519	10.6451	2.60314	4.45031	3.52673	-0.76335	2.16742	-0.352192	0.724694	NA	Not DEG
NONMMUG067865.1	0	2.27067	0	0	0	0	0.75689	0	0.378445	2.12818	4.02714	0.528459	0.597181	NA	Not DEG
NONMMUG079380.1	0	0	0	0	4.7026	0	0	1.56753	0.783766	-3.05179	3.95914	-0.770821	0.440813	NA	Not DEG
NONMMUG016608.2	0	0	0	3.53069	5.64312	15.4838	0	8.21918	4.10959	-5.4421	2.35237	-2.31345	0.0206979	NA	Down
NONMMUG083269.1	2.86032	4.54134	0	5.29603	0	24.1934	2.46722	9.8298	6.14851	-2.00003	1.95488	-1.0231	0.306262	0.999731	Not DEG
NONMMUG019804.2	0	9.08268	39.0282	5.29603	0	6.77414	16.037	4.02339	10.0302	1.99508	1.70532	1.16991	0.242036	0.999731	Not DEG
NONMMUG023409.2	0	13.624	6.00434	7.06137	0	1.93547	6.54279	2.99895	4.77087	1.1165	2.09608	0.532661	0.594268	NA	Not DEG
NONMMUG049829.1	15.255	2.27067	4.00289	8.82671	0	27.0966	7.1762	11.9744	9.57531	-0.732083	1.55931	-0.469491	0.638719	0.999731	Not DEG
NONMMUG023413.3	47.672	29.5187	20.0145	12.3574	13.1673	20.3224	32.4017	15.2824	23.842	1.08653	0.824701	1.31748	0.187679	0.999731	Not DEG
NONMMUG046070.2	0	1.13534	1.00072	0.882671	0	2.9032	0.712019	1.26196	0.986989	-0.831959	3.71904	-0.223702	0.822989	NA	Not DEG
NONMMUG015738.2	6.67407	0	23.0166	15.0054	0	25.1611	9.8969	13.3888	11.6429	-0.432706	1.63601	-0.264489	0.791403	0.999731	Not DEG
NONMMUG055408.1	0	3.40601	0	0	1.88104	1.93547	1.13534	1.27217	1.20375	-0.174527	3.77638	-0.0462154	0.963139	NA	Not DEG
NONMMUG048877.1	3.81376	0	1.00072	3.53069	0	0	1.60483	1.1769	1.39086	0.447664	3.58145	0.124995	0.900527	NA	Not DEG
NONMMUG022048.2	19.0688	1.13534	5.00361	14.1227	1.88104	0	8.40258	5.33459	6.86859	0.655136	1.77061	0.370006	0.711378	0.999731	Not DEG
NONMMUG029961.2	0	14.7594	8.00578	0	5.64312	0	7.58838	1.88104	4.73471	2.01122	2.32452	0.865221	0.386917	NA	Not DEG
NONMMUG086160.1	0	2.27067	1.00072	5.29603	3.76208	0	1.09046	3.01937	2.05492	-1.48586	2.79433	-0.53174	0.594906	NA	Not DEG
NONMMUG069629.1	0	0	0	0	14.1078	0	0	4.7026	2.3513	-4.63726	3.65267	-1.26955	0.204244	NA	Not DEG
NONMMUG012585.2	0	3.40601	0	0	0.940519	0	1.13534	0.313506	0.724421	1.75687	3.98713	0.440635	0.659477	NA	Not DEG
NONMMUG042918.2	0	0	0	0	2.82156	11.6128	0	4.81146	2.40573	-4.66918	3.21063	-1.45429	0.145867	NA	Not DEG
NONMMUG027759.2	0	2.27067	0	14.1227	0	0	0.75689	4.70758	2.73224	-2.66502	3.17651	-0.838979	0.401481	NA	Not DEG
NONMMUG009862.2	0.953439	1.13534	2.00145	0.882671	2.82156	1.93547	1.36341	1.8799	1.62165	-0.461051	2.53275	-0.182036	0.855555	NA	Not DEG
NONMMUG049442.1	0	3.40601	14.0101	14.1227	0	2.9032	5.80538	5.67532	5.74035	0.0300355	2.01586	0.0148996	0.988112	0.999731	Not DEG
NONMMUG028630.2	127.761	112.398	192.139	201.249	182.461	663.866	144.099	349.192	246.646	-1.27621	0.526019	-2.42617	0.0152589	0.632532	Down
NONMMUG090711.1	86.763	22.7067	86.0622	82.0884	80.8846	75.4833	65.1773	79.4855	72.3314	-0.283574	0.608372	-0.466119	0.64113	0.999731	Not DEG
NONMMUG013725.2	35.2772	27.248	30.0217	23.8321	15.0483	31.9352	30.849	23.6052	27.2271	0.387407	0.758544	0.510725	0.609544	0.999731	Not DEG
NONMMUG050976.1	0	1.13534	5.00361	0	0	0	2.04632	0	1.02316	3.5812	3.95117	0.906364	0.364743	NA	Not DEG
NONMMUG004231.2	106.785	139.646	124.09	118.278	93.1114	76.451	123.507	95.9468	109.727	0.363008	0.452189	0.802778	0.422103	0.999731	Not DEG
NONMMUG043395.2	10.4878	37.4661	57.0412	40.6029	10.3457	15.4838	34.9984	22.1441	28.5712	0.657253	0.897202	0.732558	0.463828	0.999731	Not DEG
NONMMUG062402.1	0	0	0	0	0	9.67735	0	3.22578	1.61289	-4.09218	3.93232	-1.04065	0.298036	NA	Not DEG
NONMMUG084982.1	0	1.13534	3.00217	0	0	0	1.37917	0	0.689584	3.01093	3.97252	0.75794	0.448487	NA	Not DEG
NONMMUG021290.2	0	0	15.0108	13.2401	0	0	5.00361	4.41336	4.70849	0.179703	2.6748	0.0671837	0.946435	NA	Not DEG
NONMMUG094060.1	0	0	0	0	0	11.6128	0	3.87094	1.93547	-4.35547	3.91835	-1.11156	0.266329	NA	Not DEG
NONMMUG029987.2	1.90688	4.54134	10.0072	1.76534	17.8699	6.77414	5.48515	8.80312	7.14413	-0.681504	1.4843	-0.459141	0.646133	0.999731	Not DEG
NONMMUG028259.2	158.271	580.156	549.397	37.0722	11.2862	11.6128	429.275	19.9904	224.633	4.41881	0.591507	7.47044	7.9929e-14	2.30276e-10	Up
NONMMUG070070.1	22.8825	44.2781	52.0376	125.339	34.7992	33.8707	39.7327	64.6698	52.2012	-0.70526	0.719096	-0.98076	0.326711	0.999731	Not DEG
NONMMUG041143.2	15.255	29.5187	0	11.4747	3.76208	2.9032	14.9246	6.04667	10.4856	1.29754	1.4849	0.873827	0.382213	0.999731	Not DEG
NONMMUG028376.2	157.317	147.594	138.1	183.596	126.97	163.547	147.67	158.038	152.854	-0.0980195	0.404135	-0.242541	0.808361	0.999731	Not DEG
NONMMUG024956.2	47.672	19.3007	38.0275	30.0108	24.4535	24.1934	35	26.2192	30.6096	0.418969	0.737404	0.568167	0.569921	0.999731	Not DEG
NONMMUG046988.1	28.6032	11.3534	10.0072	7.94404	5.64312	5.80641	16.6546	6.46452	11.5596	1.36659	1.12415	1.21567	0.224112	0.999731	Not DEG
NONMMUG079879.1	0	2.27067	0	0	0	0	0.75689	0	0.378445	2.12818	4.02714	0.528459	0.597181	NA	Not DEG
NONMMUG010978.2	3.81376	0	0	1.76534	0	0	1.27125	0.588448	0.92985	1.10918	3.93991	0.281523	0.778309	NA	Not DEG
NONMMUG048580.1	3.81376	0	0	0	0	0	1.27125	0	0.635626	2.90211	3.97762	0.729611	0.465628	NA	Not DEG
NONMMUG058701.1	9.53439	10.218	6.00434	7.06137	0	3.87094	8.58558	3.6441	6.11484	1.23225	1.63339	0.754412	0.450602	0.999731	Not DEG
NONMMUG057980.1	0	0	9.00651	0	0	18.387	3.00217	6.12899	4.56558	-1.02533	2.69831	-0.37999	0.703953	NA	Not DEG
NONMMUG010023.2	45.7651	23.842	37.0267	63.5523	46.0854	43.5481	35.5446	51.0619	43.3033	-0.520597	0.637105	-0.817129	0.413855	0.999731	Not DEG
NONMMUG026499.2	0	0	0	0	0	23.2256	0	7.74188	3.87094	-5.35569	3.10209	-1.72648	0.0842609	NA	Not DEG
NONMMUG021377.2	280.311	227.067	243.176	348.655	261.464	265.159	250.185	291.76	270.972	-0.221657	0.355889	-0.622827	0.533398	0.999731	Not DEG
NONMMUG039691.2	0	9.08268	0	0	0	0	3.02756	0	1.51378	4.14117	3.93694	1.05187	0.292857	NA	Not DEG
NONMMUG066528.1	0	0	0	7.06137	0	1.93547	0	2.99895	1.49947	-3.99008	3.82341	-1.04359	0.296674	NA	Not DEG
NONMMUG017317.3	348.005	381.473	326.236	293.93	395.959	147.096	351.905	278.995	315.45	0.334603	0.418843	0.798874	0.424363	0.999731	Not DEG
NONMMUG038539.2	6.67407	65.8494	111.08	54.7256	162.71	2.9032	61.2013	73.4462	67.3237	-0.263785	1.00916	-0.261392	0.79379	0.999731	Not DEG
NONMMUG035438.2	0	0	4.00289	0	0	0	1.3343	0	0.667149	2.96686	3.97454	0.746468	0.455385	NA	Not DEG
NONMMUG089935.1	52.4392	2.27067	55.0398	9.70939	5.64312	8.70961	36.5832	8.0207	22.3019	2.19115	1.0704	2.04703	0.0406547	0.918937	Up
NONMMUG055783.1	0	3.40601	0	0	0	11.6128	1.13534	3.87094	2.50314	-1.78467	3.25151	-0.548875	0.583091	NA	Not DEG
NONMMUG065019.1	0	0	0	5.29603	0	0	0	1.76534	0.882671	-3.22782	3.95316	-0.816516	0.414205	NA	Not DEG
NONMMUG048352.1	27.6497	12.4887	15.0108	4.41336	1.88104	21.2902	18.3831	9.19485	13.789	1.0047	1.17162	0.857532	0.391151	0.999731	Not DEG
NONMMUG053963.2	0	1.13534	0	0	0	31.9352	0.378445	10.6451	5.51176	-4.85327	2.64411	-1.8355	0.0664316	0.999731	Not DEG
NONMMUG095495.1	0	0	0	0	0	2.9032	0	0.967735	0.483867	-2.35177	3.99149	-0.589196	0.55573	NA	Not DEG
NONMMUG061290.1	0	0	13.0094	22.0668	0	0	4.33647	7.3556	5.84603	-0.762303	2.52746	-0.301609	0.76295	0.999731	Not DEG
NONMMUG008139.2	52.4392	65.8494	21.0152	56.491	22.5725	38.7094	46.4346	39.2576	42.8461	0.239943	0.711396	0.337284	0.735903	0.999731	Not DEG
NONMMUG004540.3	11.4413	0	0	0	0	0	3.81376	0	1.90688	4.48191	3.92861	1.14084	0.253937	NA	Not DEG
NONMMUG070333.1	2.86032	0	0	0	11.2862	2.9032	0.953439	4.72981	2.84163	-2.29056	2.76673	-0.827894	0.407731	NA	Not DEG
NONMMUG041998.2	0	0	0	0	7.52415	0	0	2.50805	1.25403	-3.73017	3.93957	-0.946846	0.343717	NA	Not DEG
NONMMUG028181.2	42.9048	53.3608	11.008	43.2509	47.026	80.322	35.7578	56.8663	46.312	-0.670724	0.72292	-0.927797	0.353513	0.999731	Not DEG
NONMMUG016976.2	11.4413	0	9.00651	0	3.76208	25.1611	6.81592	9.64106	8.22849	-0.493202	1.80901	-0.272637	0.785132	0.999731	Not DEG
NONMMUG064532.1	0	0	20.0145	0	1.88104	0	6.67149	0.627013	3.64925	3.41616	2.90389	1.17641	0.239433	NA	Not DEG
NONMMUG066654.1	0	1.13534	4.00289	0	0	0.967735	1.71274	0.322578	1.01766	2.36237	3.95977	0.596593	0.550779	NA	Not DEG
NONMMUG071728.1	0	0	2.00145	0	0	0	0.667149	0	0.333574	1.9693	4.04091	0.487342	0.626016	NA	Not DEG
NONMMUG075624.1	1.90688	0	0	0	0	7.74188	0.635626	2.58063	1.60813	-2.0039	3.80917	-0.526073	0.598838	NA	Not DEG
NONMMUG055221.1	17.1619	0	0	8.82671	13.1673	0	5.72063	7.33133	6.52598	-0.352961	2.15013	-0.164158	0.869607	0.999731	Not DEG
NONMMUG031342.2	0	0	1.00072	0	0	0	0.333574	0	0.166787	1.10549	4.08047	0.270923	0.78645	NA	Not DEG
[truncated: 44,881 more rows]
